# Supplementary material for: P(O)R2directed Pd(ii)-catalyzed C(sp2)–H acylation
Source: Royal Society of Chemistry journal article supplement (doi:10.1039/c4qo00005f), 2014-01-01

## **P(O)R<sub>2</sub> Directed Pd(II)-Catalyzed C(sp<sup>2</sup>)-H Acylation**

Yan-Na Ma,<sup>a</sup> Qiu-Ping Tian,<sup>a</sup> Hong-Yu Zhang,<sup>a</sup> An-Xi Zhou

and Shang-Dong Yang<sup>a,b\*</sup>

<sup>a</sup>State Key Laboratory of Applied Organic Chemistry, Lanzhou University,  
Lanzhou 730000, P. R. China. E-mail: yangshd@lzu.edu.cn;  
Fax: +86-931-8912859; Tel: +86-931-8912859

<sup>b</sup>State Key Laboratory for Oxo Synthesis and Selective Oxidation, Lanzhou  
Institute of Chemical Physics, Lanzhou 730000, P. R. China

### **Supporting Information**

#### **Table of Contents**

|                                                                                                                                 |              |
|---------------------------------------------------------------------------------------------------------------------------------|--------------|
| <b>I . General methods and materials</b>                                                                                        | <b>S2</b>    |
| <b>II . Typical procedures for the synthesis of substrates</b>                                                                  | <b>S2-S3</b> |
| <b>III. Optimization of the reaction conditions for the palladium-catalyzed C(sp<sup>2</sup>)-H acylation<br/>with alcohols</b> | <b>S3</b>    |
| <b>IV. General procedures for the palladium-catalyzed C(sp<sup>2</sup>)-H acylation</b>                                         | <b>S4</b>    |
| <b>V . General procedures for the transformations of acylated products</b>                                                      | <b>S4-S5</b> |
| <b>VI. References</b>                                                                                                           | <b>S5</b>    |
| <b>VII. Characterization of the products</b>                                                                                    | <b>S6-</b>   |
| <b>S15VIII. NMR charts</b>                                                                                                      | <b>S16-</b>  |
| <b>S54</b>                                                                                                                      |              |

## I . General Methods and Materials

$^1\text{H}$  and  $^{13}\text{C}$  NMR spectra were recorded on a Bruker advance III 400 spectrometer (400 MHz for  $^1\text{H}$  and 100 MHz for  $^{13}\text{C}$ ) in  $\text{CDCl}_3$  with TMS as internal standard. Chemical shifts ( $\delta$ ) were measured in ppm relative to TMS  $\delta = 0$  for  $^1\text{H}$ , or to chloroform  $\delta = 77.0$  for  $^{13}\text{C}$  as internal standard.  $^{31}\text{P}$  NMR spectra and  $^{19}\text{F}$  NMR were recorded on the same instrument. Data are reported as follows: Chemical shift, multiplicity (s = singlet, d = doublet, t = triplet, q = quartet, m = multiplet), Coupling constants,  $J$ , are reported in hertz. Mass data were measured with Thermo Scientific DSQ II mass spectrometer. IR spectra were recorded on a FT-IR spectrometer and only major peaks are reported in  $\text{cm}^{-1}$ . The starting materials were purchased from Aldrich, Acros Organics, J&K Chemicals Adamas-beta or TCI and used without further purification. Solvents were dried and purified according to the procedure from "Purification of Laboratory Chemicals book". Thin-layer chromatography (TLC) was performed using 60 mesh silica gel plates visualized with short-wavelength UV light (254 nm).

## II . Typical Procedures for the Synthesis of Substrates<sup>[1]</sup>

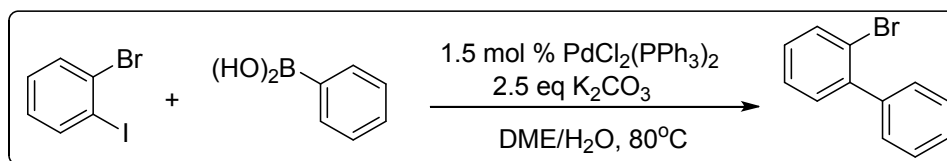

Water (4.0 mL) and DME (30.0 mL) were poured into a round-bottomed flask, fitted with a condenser and argon flow, and bubbled through with argon. Potassium carbonate (3.45 g, 25 mmol), 1-bromo-2-iodobenzene (2.8 g, 10.0 mmol), substituted phenylboronic acid (10.5 mmol), and bis(triphenylphosphine)palladium(II) chloride (105 mg, 0.15 mmol) were added to the mixture, which was stirred at  $80^\circ\text{C}$  for 5 h in an oil bath until substrate disappeared as judged by TLC. The reaction mixture was allowed to cool to r.t., DME was evaporated, and water (40.0 mL) and ether (20.0 mL) were added. The layers were separated and the aqueous layer was extracted with diethylether (3 x 20.0 mL). The combined organic layers were washed with brine, dried over magnesium sulfate, filtered, and evaporated in vacuo to obtain a yellow oil, which was purified further using column chromatography on silica gel (eluent: heptane 30% EtOAc in heptane). The title compound was isolated as a white amorphous solid (2.10 g, 90%).

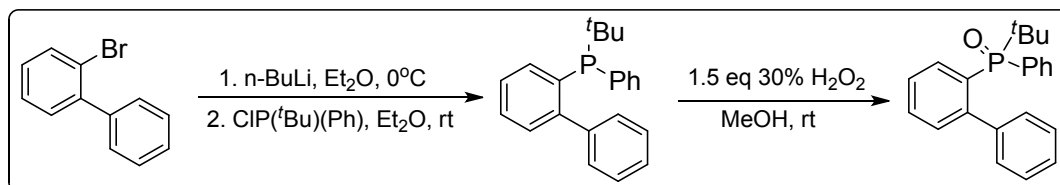

5.6 mL (14.0 mmol) of  $n\text{-BuLi}$  in  $n\text{-hexane}$  (2.50 M) were added dropwise to a suspension of

(11.5 mmol) of 2-bromo-1,1'-biphenyl in 24 mL of diethyl ether at 0 °C. The resulting beige-colored suspension was stirred for an additional 2 h at 0 °C. Then, CIP(*t*-Bu)(Ph) (2.0 g, 10.0 mmol) was added dropwise in freshly distilled diethyl ether (20.0 mL). The mixture was then stirred at r.t. for 2 h, filtered and solvent was removed in vacuo to yield a residue, which was used without further purification. To the residue in MeOH (36.0 mL) was added dropwise at < 40 °C 30 % aq. H<sub>2</sub>O<sub>2</sub> solution (1.7 mL, 15.0 mmol). The resulting clear solution was stirred at r.t. for 1 h, treated with sat. Na<sub>2</sub>SO<sub>3</sub> solution (2.0 mL), and the mixture was concentrated at the rotavapor to remove the MeOH. The aqueous layer was extracted with CH<sub>2</sub>Cl<sub>2</sub> (3 × 20 mL). The extract was washed with brine and dried over MgSO<sub>4</sub>. The organic layers were dried over Na<sub>2</sub>SO<sub>4</sub>, filtered and solvent was evaporated under reduced pressure. The desired product was obtained after purification by flash chromatography on silica gel.

### III. Optimization of the reaction conditions for the palladium-catalyzed C(sp<sup>2</sup>)-H acylation with alcohols<sup>a</sup>

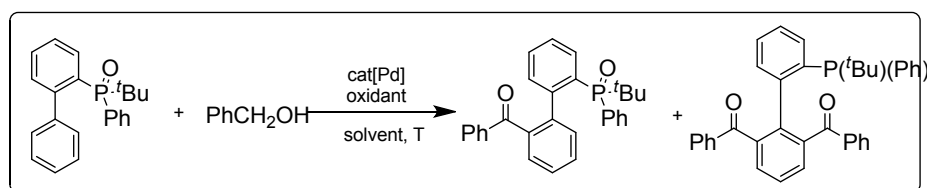

| Entry           | Cat                                                 | Oxidant                                                       | Solvent            | Yield (%) <sup>b</sup> | Ratio <sup>c</sup> |
|-----------------|-----------------------------------------------------|---------------------------------------------------------------|--------------------|------------------------|--------------------|
| 1               | Pd(OAc) <sub>2</sub>                                | K <sub>2</sub> S <sub>2</sub> O <sub>8</sub>                  | CH <sub>3</sub> CN | trace                  |                    |
| 2               | Pd(OAc) <sub>2</sub>                                | TBHP                                                          | CH <sub>3</sub> CN | 5                      |                    |
| 3               | Pd(OAc) <sub>2</sub>                                | Ag <sub>2</sub> O                                             | CH <sub>3</sub> CN | n.r.                   |                    |
| 4               | Pd(OAc) <sub>2</sub>                                | (NH <sub>4</sub> ) <sub>2</sub> S <sub>2</sub> O <sub>8</sub> | CH <sub>3</sub> CN | trace                  |                    |
| 5               | Pd(OAc) <sub>2</sub>                                | TBHP                                                          | DCE                | 58                     | 10 : 1             |
| 6               | Pd(OAc) <sub>2</sub>                                | TBHP                                                          | PhCl               | 48                     | 14:1               |
| 7               | Pd(OAc) <sub>2</sub>                                | TBHP                                                          | DME                | n.r.                   |                    |
| 8               | Pd(TFA) <sub>2</sub>                                | TBHP                                                          | DCE                | 70                     | 10 : 1             |
| 9               | PdCl <sub>2</sub>                                   | TBHP                                                          | DCE                | trace                  |                    |
| 10              | Pd(CH <sub>3</sub> CN) <sub>2</sub> Cl <sub>2</sub> | TBHP                                                          | DCE                | trace                  |                    |
| 11 <sup>d</sup> | Pd(TFA) <sub>2</sub>                                | TBHP                                                          | DCE                | 76                     | 10 : 1             |
| 12 <sup>e</sup> | Pd(TFA) <sub>2</sub>                                | TBHP                                                          | DCE                | 80                     | 10 : 1             |

<sup>a</sup> Reaction conditions: **1a** (0.3 mmol), benzyl alcohol (0.6 mmol), Pd catalyst (10 mol %), oxidant (0.75 mmol), solvent (1.5 mL), 100 °C for 16 h under air atmosphere unless otherwise noted. <sup>b</sup> Isolated yield. <sup>c</sup> Ratio of **2a** : **3a**. <sup>d</sup> 80 °C. <sup>e</sup> 60 °C.

#### IV. General procedures for the palladium-catalyzed C(sp<sup>2</sup>)-H acylation.

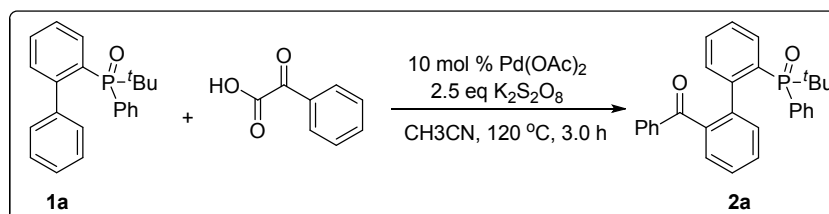

Under air atmosphere, 2-(*tert*-butylphenylphosphoryl)biphenyl **1a** (100.2 mg, 0.30 mmol, 1.0 equiv), Pd(OAc)<sub>2</sub> (6.7 mg, 0.03 mmol, 10 mol %), K<sub>2</sub>S<sub>2</sub>O<sub>8</sub> (202.5 mg, 0.75 mmol, 2.5 equiv), and benzoyl formic acid **2a** (90 mg, 0.6 mmol, 2.0 equiv) were added to a sealed tube containing a magnetic stir bar. After which, 3.0 mL CH<sub>3</sub>CN was added with a syringe. Then the mixture was stirred at 130 °C in an oil bath for 3.0 hours. After cooling to room temperature, the solution was removed in vacuo to yield a residue, which was purified by silica gel to afford pure **3a** as oil (101.1 mg, 72%).

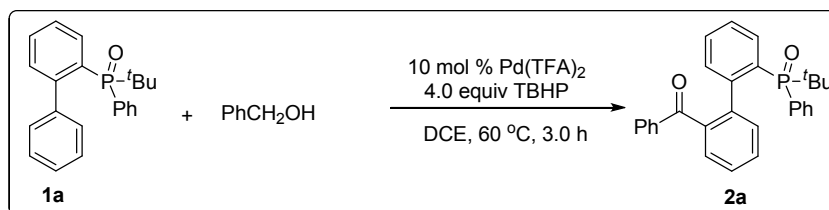

Under air atmosphere, 2-(*tert*-butylphenylphosphoryl)biphenyl **1a** (100.2 mg, 0.30 mmol, 1.0 equiv) and Pd(TFA)<sub>2</sub> (9.9 mg, 0.03 mmol, 10 mol %) were added to a tube containing a magnetic stir bar. After which, 1.5 mL DCE was added using a syringe. Then 70 % aq. TBHP solution (165 uL, 1.20 mmol, 4.0 equiv) and benzyl alcohol (78 uL, 0.75 mmol, 2.5 eq) were added with microsyringes. The reaction mixture was stirred at 60 °C in an oil bath for 16 hours until substrate disappeared as judged by TLC. After cooling to room temperature, the solution was removed in vacuo to yield a residue, which was purified by silica gel to afford pure **2a** and **3a** (80% **2a** : **3a** = 10:1).

#### V. General procedures for the transformations of acylated products

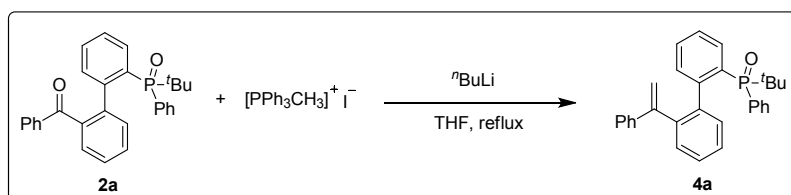

Under Ar atmosphere, 0.1 mL (0.25 mmol) of *n*-BuLi in *n*-hexane (2.50 M) were added dropwise to a suspension of triphenylmethyphosphonium iodide (0.3 mmol) in 2 mL of THF at 0

°C. The resulting suspension was stirred for an additional 2 h at rt. Then, 87.2 mg (0.2 mmol) of (2'-(*tert*-butyl(phenyl)phosphoryl)biphenyl-2-yl)(phenyl)methanone was added dropwise in freshly distilled THF (1.0 mL). The mixture was then stirred for 10 h under reflux. The desired product was obtained after purification by flash chromatography on silica gel (white solid, 71 mg, 81%).<sup>[2]</sup>

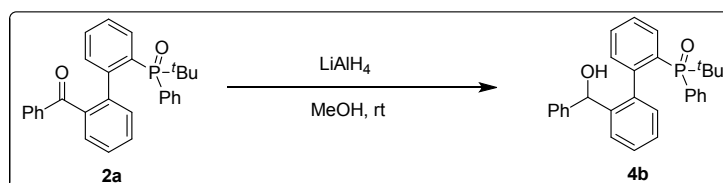

87.2 mg (0.2 mmol) of (2'-(*tert*-butyl(phenyl)phosphoryl)biphenyl-2-yl)(phenyl)methanone was dissolved in 2.0 mL MeOH. Then 0.24 mmol of LiAlH<sub>4</sub> was added slowly at 0 °C. After 10 minutes, the reaction was completed. The desired product was obtained after purification by flash chromatography on silica gel (white solid, 45 mg, 51 %).

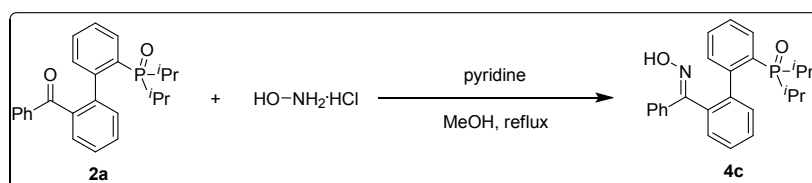

(2'-(diisopropylphosphoryl)biphenyl-2-yl)(phenyl)methanone (0.2 mmol) and hydroxylamine hydrochloride (0.8 mmol) were dissolved in 2 ml MeOH. Pyridine (1.0 mmol) was added *via* syringe and after stirring at room temperature overnight the solvent was evaporated. The product was obtained after purification by flash chromatography on silica gel (white solid, 58 mg, 71%).<sup>[3]</sup>

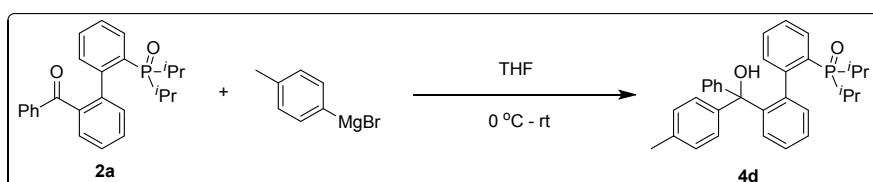

(2'-(diisopropylphosphoryl)biphenyl-2-yl)(phenyl)methanone (0.2 mmol) was dissolved in 2 ml THF, *p*-tolylmagnesium bromide (3.0 mmol, 1.5 equiv) was added slowly *via* syringe at 0 °C and after stirring at room temperature for 3 hours the solvent was evaporated. The product was obtained after purification by flash chromatography on silica gel (white solid, 59 mg, 61%)

## VI. References

- [1] H. L. Wang, R. B. Hu, H. Zhang, A. X. Zhou and S.-D. Yang, *Org. Lett.* 2013, **15**, 5302.
- [2] X. Wang, Y. F. Chen, L. F. Niu and P. F. Xu, *Org. Lett.*, 2009, **11**, 3310.
- [3] S. B. Liu, Y. Yu and L. S. Liebeskind, *Org. Lett.*, 2007, **9**, 1947.

## VII. Characterization of the products

**Note:** when the directed group is -P(O)(tBu)(Ph), the products have two chiral centers, which determine they are a mixture of four diastereoisomers.

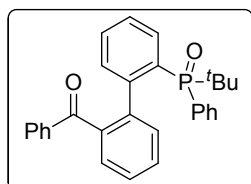

colorless oil;  $^{31}\text{P NMR}$  (162 MHz,  $\text{CDCl}_3$ )  $\delta$ : 40.98, 39.67;  $^1\text{H NMR}$  (400 MHz,  $\text{CDCl}_3$ )  $\delta$ : 7.98 (d,  $J = 7.3$  Hz, 0.78H), 7.90-7.80 (m, 1.0H), 7.74-7.72 (m, 1.0H), 7.64-7.60 (m, 1.0H), 7.57-7.53 (t,  $J = 7.2$  Hz, 1.0H), 7.51-7.33 (m, 7.3H), 7.30-7.23 (m, 3.3H), 7.17-7.10 (m, 1.0H), 7.07-7.03 (m, 1.0H), 6.64 (d,  $J = 7.6$  Hz, 0.4H), 1.23 (d,  $J = 14.5$  Hz, 5.0H), 1.15 (d,  $J = 14.5$  Hz, 4.0H);  $^{13}\text{C NMR}$  (100 MHz,  $\text{CDCl}_3$ )  $\delta$ : 198.22, 196.59, 146.77, 146.72, 146.22, 146.17, 141.76, 141.72, 140.56, 140.53, 138.20, 138.05, 137.87, 137.11, 134.05, 133.97, 133.26, 133.16, 133.11, 132.18, 132.05, 131.99, 131.94, 131.86, 131.78, 131.74, 131.00, 130.93, 130.89, 130.82, 130.79, 130.63, 130.49, 130.40, 130.37, 130.23, 130.21, 130.15, 130.12, 129.32, 129.24, 128.63, 128.52, 127.93, 127.82, 127.78, 127.64, 127.33, 127.22, 126.45, 126.11, 126.06, 125.94, 125.88, 125.77, 35.12 (d,  $J = 16.0$  Hz), 34.42 (d,  $J = 16.0$  Hz), 26.01, 25.92; **MS (ESI)**: found  $[\text{M}+\text{H}]^+$  439.4

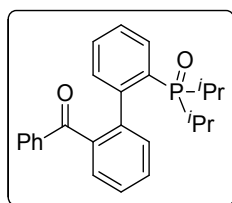

colorless oil;  $^{31}\text{P NMR}$  (162 MHz,  $\text{CDCl}_3$ )  $\delta$ : 52.17;  $^1\text{H NMR}$  (400 MHz,  $\text{CDCl}_3$ )  $\delta$ : 7.97-7.95 (m, 2H), 7.53-7.45 (m, 3H), 7.43-7.35 (m, 5H), 7.33 (s, 1H), 7.32-7.27 (m, 2H), 2.20-2.00 (m, 2H), 1.05-0.99 (m, 9H), 0.58 (dd,  $J = 15.4$  Hz,  $J = 7.2$  Hz, 3H);  $^{13}\text{C NMR}$  (100 MHz,  $\text{CDCl}_3$ )  $\delta$ : 197.04, 147.24 (d,  $J = 4.3$  Hz), 141.01 (d,  $J = 3.1$  Hz), 138.28, 138.11, 133.22, 133.13, 132.00, 131.00, 130.61, 129.96 (d,  $J = 10.8$  Hz), 129.85 (d,  $J = 2.5$  Hz), 129.27 (d,  $J = 7.4$  Hz), 127.59, 126.92 (d,  $J = 82.1$  Hz), 126.26 (d,  $J = 11.1$  Hz), 125.98, 27.96 (d,  $J = 65.1$  Hz), 25.60 (d,  $J = 67.0$  Hz), 16.72 (d,  $J = 1.4$  Hz), 15.67 (d,  $J = 3.0$  Hz), 15.60 (d,  $J = 3.2$  Hz), 14.91 (d,  $J = 2.6$  Hz); **MS (ESI)**: found  $[\text{M}+\text{H}]^+$  391.3

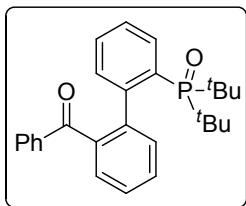

colorless oil;  $^{31}\text{P NMR}$  (162 MHz,  $\text{CDCl}_3$ )  $\delta$ : 54.54;  $^1\text{H NMR}$  (400 MHz,  $\text{CDCl}_3$ )  $\delta$ : 8.00-7.98 (m, 2H), 7.55-7.29 (m, 10H), 7.24 (d,  $J = 7.6$  Hz, 1H), 1.18 (d,  $J = 13.3$  Hz, 9H), 0.98 (d,  $J = 13.4$  Hz, 9H);  $^{13}\text{C NMR}$  (100 MHz,  $\text{CDCl}_3$ )  $\delta$ : 197.46, 147.48 (d,  $J = 3.5$  Hz), 142.93 (d,  $J = 2.7$  Hz), 138.47, 137.79, 134.33, 134.24, 132.10, 131.16, 130.68 (d,  $J = 11.4$  Hz), 130.44, 129.36 (d,  $J = 2.6$  Hz), 129.19 (d,  $J = 4.7$  Hz), 127.65, 127.50 (d,  $J = 67.7$  Hz), 125.74, 125.32 (d,  $J = 11.1$  Hz), 37.12 (d,  $J = 40.7$  Hz), 36.54 (d,  $J = 39.8$  Hz), 27.90, 26.91; **MS (ESI)**: found  $[\text{M}+\text{H}]^+$  419.2

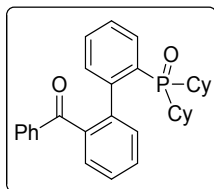

colorless oil;  $^{31}\text{P NMR}$  (162 MHz,  $\text{CDCl}_3$ )  $\delta$ : 47.51;  $^1\text{H NMR}$  (400 MHz,  $\text{CDCl}_3$ )  $\delta$ : 7.98 (d,  $J = 7.6$  Hz, 2H), 7.51-7.45 (m, 3H), 7.42-7.34 (m, 6H), 7.32-7.26 (m, 2H), 1.89-1.60 (m, 9H), 1.46-1.43 (m, 1H), 1.30-1.04 (m, 9H), 0.92-0.86 (m, 1H), 0.78-0.71 (m, 1H), 0.61-0.56 (m, 1H);  $^{13}\text{C NMR}$  (100 MHz,  $\text{CDCl}_3$ )  $\delta$ : 196.92, 147.06 (d,  $J = 4.4$  Hz), 142.04 (d,  $J = 2.8$  Hz), 137.99, 137.94, 133.14 (d,  $J = 9.0$  Hz), 132.07, 131.25, 130.42, 129.78 (d,  $J = 11.0$  Hz), 129.55 (d,  $J = 2.4$  Hz), 129.20, 128.86, 127.52, 126.72, 126.22 (d,  $J = 2.1$  Hz), 125.80, 37.96 (d,  $J = 65.2$  Hz), 35.56 (d,  $J = 67.1$  Hz), 26.51, 26.40 (d,  $J = 3.1$  Hz), 26.29, 26.17, 26.05, 25.69, 25.57, 25.29 (d,  $J = 3.0$  Hz), 24.63 (d,  $J = 2.5$  Hz), 24.54 (d,  $J = 3.1$  Hz); **MS (ESI)**: found  $[\text{M}+\text{H}]^+$  471.2

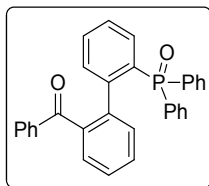

colorless oil;  $^{31}\text{P NMR}$  (162 MHz,  $\text{CDCl}_3$ )  $\delta$ : 28.55;  $^1\text{H NMR}$  (400 MHz,  $\text{CDCl}_3$ )  $\delta$ : 7.85-7.83 (m, 2H), 7.75-7.71 (m, 2H), 7.60-7.737 (m, 11H), 7.33-7.29 (t,  $J = 6.9$  Hz, 6H), 7.28-7.14 (m, 7H);  $^{13}\text{C NMR}$  (100 MHz,  $\text{CDCl}_3$ )  $\delta$ : 197.10, 145.51 (d,  $J = 7.7$  Hz), 140.46 (d,  $J = 3.8$  Hz), 138.17, 137.27, 134.45, 134.10 (d,  $J = 12.3$  Hz), 133.39 (d,  $J = 8.0$  Hz), 132.36 (d,  $J = 12.6$  Hz), 132.17 (d,  $J = 9.7$  Hz), 131.89, 131.79 (d,  $J = 3.1$  Hz), 131.67, 131.34 (d,  $J = 2.3$  Hz), 131.26, 131.01, 130.98, 130.41, 130.24, 129.59 (d,  $J = 10.0$  Hz), 128.27 (d,  $J = 11.8$  Hz), 128.10, 127.72 (d,  $J = 12.1$  Hz), 126.69, 126.57 (d,  $J = 12.5$  Hz); **MS (ESI)**: found  $[\text{M}+\text{H}]^+$  459.4

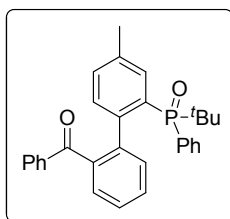

colorless oil;  $^{31}\text{P}$  NMR (162 MHz,  $\text{CDCl}_3$ )  $\delta$ : 40.88, 39.55;  $^1\text{H}$  NMR (400 MHz,  $\text{CDCl}_3$ )  $\delta$ : 7.99 (d,  $J = 7.2$  Hz, 0.8H), 7.73 (d,  $J = 7.2$  Hz, 1.2H), 7.68-7.62 (m, 1.8H), 7.55-7.34 (m, 6.0H), 7.28-7.21 (m, 4.2H), 7.17-7.09 (m, 1.6H), 7.07-7.02 (m, 1.2H), 6.64 (d,  $J = 8.0$  Hz, 0.4H), 2.40 (s, 3.0H), 1.26- 1.13 (m, 9.0H);  $^{13}\text{C}$  NMR (100 MHz,  $\text{CDCl}_3$ )  $\delta$ : 198.34, 196.71, 143.73, 143.68, 143.26, 143.21, 141.73, 141.70, 140.54, 140.51, 138.29, 138.01, 137.85, 137.13, 135.58, 135.47, 135.39, 135.28, 134.02, 133.93, 133.84, 133.14, 133.09, 132.99, 132.61, 132.50, 132.19, 132.03, 131.90, 131.86, 131.78, 131.75, 131.66, 131.42, 131.31, 131.17, 131.14, 131.09, 131.01, 130.96, 130.94, 130.78, 130.76, 130.69, 130.53, 130.33, 130.30, 129.54, 129.25, 129.13, 128.66, 128.49, 128.45, 127.90, 127.80, 127.64, 127.58, 127.28, 127.17, 126.29, 125.93, 35.22, 35.04, 34.52, 34.34, 26.07, 25.97, 21.30; **MS (ESI)**: found  $[\text{M}+\text{H}]^+$  453.2

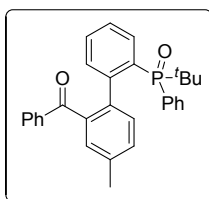

colorless oil;  $^{31}\text{P}$  NMR (162 MHz,  $\text{CDCl}_3$ )  $\delta$ : 40.67, 39.39;  $^1\text{H}$  NMR (400 MHz,  $\text{CDCl}_3$ )  $\delta$ : 7.99 (d,  $J = 7.2$  Hz, 0.8H), 7.88-7.78 (m, 1.0H), 7.73 (d,  $J = 7.0$  Hz, 1.0H), 7.66-7.62 (m, 1.0H), 7.53-7.17 (m, 10.4H), 7.05-7.04 (m, 1.6H), 6.94 (d,  $J = 7.2$  Hz, 0.5H), 7.53 (d,  $J = 7.6$  Hz, 0.4H), 2.32-2.31 (d, 3.0 H), 1.25-1.14 (m, 9.0 H);  $^{13}\text{C}$  NMR (100 MHz,  $\text{CDCl}_3$ )  $\delta$ : 198.69, 196.84, 146.84, 146.79, 146.23, 138.88, 138.23, 138.06, 137.97, 137.60, 137.12, 136.15, 135.70, 134.34, 134.25, 134.13, 133.45, 133.35, 133.25, 132.17, 132.09, 131.92, 131.83, 131.77, 131.68, 131.55, 131.17, 130.95, 130.84, 130.64, 130.49, 130.32, 130.19, 130.06, 129.81, 129.33, 129.10, 128.97, 128.77, 127.95, 127.84, 127.64, 127.48, 127.29, 129.18, 125.92, 125.76, 125.64, 35.18 (d,  $J = 19$  Hz), 34.48 (d,  $J = 19$  Hz), 26.09, 25.98, 21.08, 21.02; **MS (ESI)**: found  $[\text{M}+\text{H}]^+$  453.2

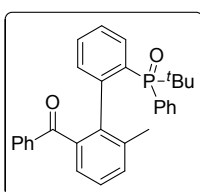

colorless oil;  $^{31}\text{P}$  NMR (162 MHz,  $\text{CDCl}_3$ )  $\delta$ : 38.57;  $^1\text{H}$  NMR (400 MHz,  $\text{CDCl}_3$ )  $\delta$ : 7.98-7.97 (m, 2H), 7.92-7.88 (m, 1H), 7.70-7.66 (m, 2H), 7.58-7.54 (m, 1H), 7.51-7.36 (m, 8H), 7.24-7.17 (m,



3H), 1.44 (s, 3H), 1.01 (d,  $J = 14.6$  Hz, 9H);  $^{13}\text{C}$  NMR (100 MHz,  $\text{CDCl}_3$ )  $\delta$ : 197.85, 145.69 (d,  $J = 4.8$  Hz), 141.10 (d,  $J = 2.8$  Hz), 138.72, 137.64, 136.49, 134.49, 134.39, 132.63, 132.12, 131.88, 131.80, 131.58, 131.04, 130.83, 130.80, 130.74, 130.63, 130.16 (d,  $J = 2.5$  Hz), 127.94, 127.83, 127.69, 126.84, 126.13, 126.01, 125.84; **MS (ESI)**: found  $[\text{M}+\text{H}]^+$  453.2

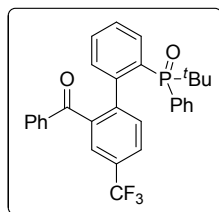

colorless oil;  $^{31}\text{P}$  NMR (162 MHz,  $\text{CDCl}_3$ )  $\delta$ : 41.19, 39.74;  $^1\text{H}$  NMR (400 MHz,  $\text{CDCl}_3$ )  $\delta$ : 7.97 (d,  $J = 12.4$  Hz, 0.8H), 7.93-7.88 (m, 0.5H), 7.87-7.82 (m, 0.6H), 7.72-7.60 (m, 3.6H), 7.53-7.32 (m, 7.7H), 7.29-7.24 (m, 2.0H), 7.21-7.17 (m, 0.6H), 7.08-7.04 (m, 1.0H), 6.73 (d,  $J = 8.0$  Hz, 0.4H), 1.26-1.13 (m, 9.0H);  $^{13}\text{C}$  NMR (100 MHz,  $\text{CDCl}_3$ )  $\delta$ : 196.98, 195.32, 145.52, 145.37, 145.32, 144.76, 144.71, 144.24, 138.82, 137.81, 137.24, 136.94, 134.10, 134.01, 133.56, 133.18, 133.08, 132.86, 132.71, 132.17, 132.06, 131.88, 131.80, 131.74, 131.66, 131.48, 131.32, 131.24, 131.21, 130.99, 130.88, 130.80, 130.78, 130.72, 130.59, 130.51, 130.48, 130.42, 129.77, 128.95, 128.89, 128.62, 128.53, 128.29, 128.25, 128.16, 128.14, 128.02, 127.65, 127.60, 127.49, 126.83, 126.71, 126.64, 126.52, 125.96, 125.92, 125.59, 125.33, 125.12, 125.07, 125.03, 122.42, 35.29, 35.16, 34.59, 34.47, 25.98, 25.87;  $^{19}\text{F}$  NMR (376 Hz,  $\text{CDCl}_3$ )  $\delta$ : -62.39, -62.50; **MS (ESI)**: found  $[\text{M}+\text{H}]^+$  507.2

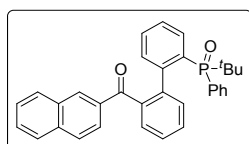

colorless oil;  $^{31}\text{P}$  NMR (162 MHz,  $\text{CDCl}_3$ )  $\delta$ : 40.65, 39.81;  $^1\text{H}$  NMR (400 MHz,  $\text{CDCl}_3$ )  $\delta$ : 8.65 (s, 0.4H), 8.27 (s, 0.5H), 8.03-7.98 (m, 0.8H), 7.87-7.76 (m, 3.4H), 7.69-7.63 (m, 1.4H), 7.60-7.25 (m, 10.5H), 7.15 (t,  $J = 7.2$  Hz, 0.5H), 6.94-6.90 (m, 0.6H), 6.82-6.78 (m, 1.0H), 6.67 (d,  $J = 8.0$  Hz, 0.4H), 1.24-1.02 (m, 9.0H);  $^{13}\text{C}$  NMR (100 MHz,  $\text{CDCl}_3$ )  $\delta$ : 198.74, 196.63, 146.81, 146.75, 146.07, 146.02, 141.91, 141.88, 140.30, 140.26, 138.70, 137.42, 135.27, 135.23, 135.10, 134.97, 134.27, 134.18, 134.10, 133.54, 133.44, 133.33, 133.25, 132.29, 132.04, 131.95, 131.85, 131.74, 131.72, 131.66, 131.64, 131.55, 131.48, 131.02, 130.91, 130.87, 130.66, 130.25, 130.20, 130.17, 129.74, 129.68, 129.37, 129.07, 128.86, 128.54, 128.44, 128.28, 128.10, 128.05, 128.01, 127.94, 127.66, 127.58, 127.51, 127.44, 127.40, 127.16, 127.05, 126.74, 126.25, 126.21, 126.10, 126.00, 125.97, 125.86, 125.65, 125.14, 35.16, 34.47, 25.97, 25.91; **MS (ESI)**: found  $[\text{M}+\text{H}]^+$  489.2

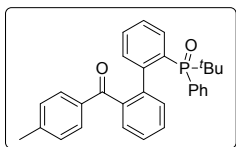

colorless oil;  $^{31}\text{P}$  NMR (162 MHz,  $\text{CDCl}_3$ )  $\delta$ : 40.91, 39.71;  $^1\text{H}$  NMR (400 MHz,  $\text{CDCl}_3$ )  $\delta$ : 7.89-7.82 (m, 1.7H), 7.63 (d,  $J = 8.0$  Hz, 2.0H), 7.57-7.02 (m, 12.7H), 6.67 (d,  $J = 7.6$  Hz, 0.4H), 2.35-2.32 (m, 3.0H), 1.26-1.13 (m, 9.0H);  $^{13}\text{C}$  NMR (100 MHz,  $\text{CDCl}_3$ )  $\delta$ : 197.99, 196.41, 146.68, 146.63, 146.25, 146.20, 142.93, 142.76, 141.39, 141.36, 140.43, 140.40, 138.44, 137.36, 135.48, 135.23, 134.07, 133.98, 133.30, 133.21, 133.12, 132.11, 132.00, 131.91, 131.83, 131.77, 131.71, 131.69, 130.98, 130.84, 130.67, 130.32, 130.29, 130.24, 130.22, 130.14, 130.11, 129.77, 129.00, 128.93, 128.73, 128.58, 128.47, 128.40, 128.31, 127.95, 127.84, 127.28, 127.16, 126.43, 126.11, 126.04, 125.92, 125.89, 125.77, 35.24, 35.07, 34.54, 34.37, 26.02, 25.96, 21.53, 21.47; **MS (ESI)**: found  $[\text{M}+\text{H}]^+$  453.2

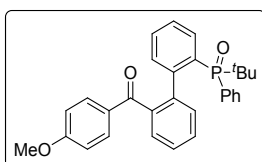

colorless oil;  $^{31}\text{P}$  NMR (162 MHz,  $\text{CDCl}_3$ )  $\delta$ : 40.67, 39.41;  $^1\text{H}$  NMR (400 MHz,  $\text{CDCl}_3$ )  $\delta$ : 8.02 (d,  $J = 8.8$  Hz, 1.0H), 7.89-7.85 (m, 0.5H), 7.82-7.78 (m, 0.6H), 7.74 (d,  $J = 8.8$  Hz, 1.0H), 7.67-7.63 (m, 1.0H), 7.54-7.46 (m, 2.2H), 7.44-7.22 (m, 7.0H), 7.19-7.15 (m, 0.6H), 7.12-7.04 (m, 1.5H), 6.83 (d,  $J = 8.8$  Hz, 1.0H), 6.71 (d,  $J = 8.8$  Hz, 1.0H), 6.64 (d,  $J = 7.6$  Hz, 0.4H), 3.79-3.77 (m, 3.0H), 1.23-1.15 (m, 9.0H);  $^{13}\text{C}$  NMR (100 MHz,  $\text{CDCl}_3$ )  $\delta$ : 197.23, 195.56, 163.01, 162.85, 146.66, 146.60, 146.10, 141.28, 141.25, 140.00, 139.97, 138.81, 137.78, 134.25, 134.16, 134.10, 133.48, 133.38, 133.17, 132.97, 132.12, 132.09, 132.01, 131.90, 131.81, 131.76, 131.68, 131.49, 131.19, 130.95, 130.88, 130.64, 130.37, 130.35, 130.17, 130.15, 129.84, 128.96, 128.78, 128.58, 128.50, 128.07, 128.03, 128.00, 127.89, 127.70, 127.34, 127.23, 126.56, 126.09, 125.97, 113.12, 112.93, 55.25, 55.23, 35.28, 35.12, 34.58, 34.42, 26.08, 25.97; **MS (ESI)**: found  $[\text{M}+\text{H}]^+$  469.2

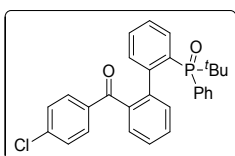

colorless oil;  $^{31}\text{P}$  NMR (162 MHz,  $\text{CDCl}_3$ )  $\delta$ : 40.62, 39.42;  $^1\text{H}$  NMR (400 MHz,  $\text{CDCl}_3$ )  $\delta$ : 7.94 (d,  $J = 8.5$  Hz, 0.8H), 7.91-7.87 (m, 0.4H), 7.77-7.72 (m, 0.6H), 7.67 (d,  $J = 8.5$  Hz, 1.0H), 7.59-7.55 (m, 1.0H), 7.51-7.45 (m, 3.6H), 7.43-7.21 (m, 6.7H), 7.14-7.07 (m, 2.7H), 6.55 (d,  $J = 7.7$  Hz, 0.4H), 1.22-1.14 (m, 9.0H);  $^{13}\text{C}$  NMR (100 MHz,  $\text{CDCl}_3$ )  $\delta$ : 197.31, 195.75, 146.84, 146.79,

146.04, 146.00, 141.79, 141.76, 140.46, 140.43, 138.59, 138.45, 138.08, 137.31, 136.46, 135.97, 134.25, 134.16, 133.97, 133.66, 133.57, 133.10, 132.16, 132.13, 132.07, 131.96, 131.84, 131.76, 131.74, 131.65, 131.33, 131.19, 130.94, 130.91, 130.84, 130.74, 130.68, 130.66, 130.31, 130.28, 130.25, 129.82, 129.48, 128.94, 128.78, 128.63, 128.43, 128.16, 128.01, 127.92, 127.51, 127.46, 127.13, 126.67, 126.30, 126.26, 126.15, 125.99, 125.88, 35.23, 34.53, 26.05, 25.87; **MS (ESI)**: found  $[M+H]^+$  473.2, 475.2

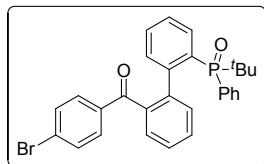

colorless oil;  $^{31}\text{P}$  NMR (162 MHz,  $\text{CDCl}_3$ )  $\delta$ : 41.13, 39.90;  $^1\text{H}$  NMR (400 MHz,  $\text{CDCl}_3$ )  $\delta$ : 7.92-7.84 (m, 1.3H), 7.78-7.73 (m, 0.6H), 7.63-7.22 (m, 13.4H), 7.12-7.07 (m, 1.5H), 6.54 (d,  $J = 7.6$  Hz, 0.4H), 1.22-1.15 (m, 9.0H);  $^{13}\text{C}$  NMR (100 MHz,  $\text{CDCl}_3$ )  $\delta$ : 197.37, 195.85, 146.80, 146.75, 146.05, 146.00, 141.74, 141.71, 140.46, 140.42, 137.89, 137.12, 136.83, 136.28, 134.18, 134.09, 133.71, 133.62, 133.53, 132.83, 132.24, 132.03, 131.92, 131.81, 131.77, 131.62, 131.33, 131.13, 130.90, 130.85, 130.74, 130.72, 130.36, 130.34, 129.54, 128.86, 128.66, 128.54, 128.00, 127.89, 127.81, 127.58, 127.47, 127.36, 127.28, 126.92, 126.63, 126.27, 126.15, 126.01, 125.89, 35.21, 35.16, 34.51, 34.46, 25.99, 25.82; **MS (ESI)**: found  $[M+H]^+$  517.2, 519.2

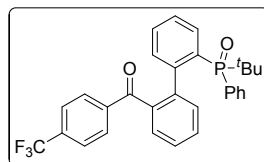

colorless oil;  $^{31}\text{P}$  NMR (162 MHz,  $\text{CDCl}_3$ )  $\delta$ : 40.83, 39.50;  $^1\text{H}$  NMR (400 MHz,  $\text{CDCl}_3$ )  $\delta$ : 8.06 (d,  $J = 8.1$  Hz, 0.8H), 7.92-7.87 (m, 0.4H), 7.83 (d,  $J = 8.0$  Hz, 1.0H), 7.76-7.71 (m, 0.6H), 7.60 (d,  $J = 8.4$  Hz, 0.9H), 7.55-7.26 (m, 11.0H), 7.20-7.16 (m, 0.6H), 7.10-7.04 (m, 1.6H), 6.51 (d,  $J = 7.6$  Hz, 0.4H), 1.21-1.14 (m, 9.0H);  $^{13}\text{C}$  NMR (100 MHz,  $\text{CDCl}_3$ )  $\delta$ : 197.40, 195.74, 146.97, 146.92, 146.10, 146.05, 142.20, 142.17, 141.25, 140.72, 140.69, 140.52, 137.71, 136.99, 134.14, 134.05, 133.85, 133.61, 133.52, 133.32, 132.99, 132.05, 131.97, 131.81, 131.73, 131.63, 131.30, 131.08, 130.99, 130.90, 130.82, 130.77, 130.44, 130.41, 130.00, 129.79, 129.26, 128.95, 128.84, 128.37, 128.00, 127.89, 127.82, 127.60, 127.49, 126.93, 126.82, 126.76, 126.38, 126.32, 126.21, 126.05, 125.94, 125.11, 125.05, 124.84, 124.81, 124.65, 124.61, 124.58, 35.25, 35.10, 34.56, 34.40, 25.99, 25.81;  $^{19}\text{F}$  NMR (376 Hz,  $\text{CDCl}_3$ )  $\delta$ : -62.93, -62.98; **MS (ESI)**: found  $[M+H]^+$  507.2

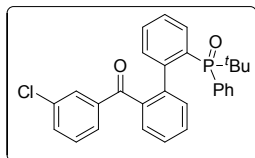

colorless oil;  $^{31}\text{P NMR}$  (162 MHz,  $\text{CDCl}_3$ )  $\delta$ : 40.73, 39.51;  $^1\text{H NMR}$  (400 MHz,  $\text{CDCl}_3$ )  $\delta$ : 7.92-7.87 (m, 1.2H), 7.84-7.79 (m, 0.6H), 7.64 (s, 0.6H), 7.60-7.07 (m, 11.4H), 6.58 (d,  $J = 7.6$  Hz, 0.4H), 1.22-1.14 (m, 9.0H);  $^{13}\text{C NMR}$  (100 MHz,  $\text{CDCl}_3$ )  $\delta$ : 196.92, 195.24, 146.87, 146.81, 146.13, 146.08, 142.18, 142.15, 140.66, 140.63, 139.92, 139.44, 137.72, 136.69, 134.09, 134.03, 134.00, 133.90, 133.49, 133.40, 132.97, 132.14, 131.95, 131.90, 131.86, 131.81, 131.78, 131.70, 131.53, 130.96, 130.90, 130.85, 130.79, 130.60, 130.58, 130.38, 130.36, 130.32, 130.12, 129.95, 129.91, 129.29, 129.12, 129.07, 129.01, 128.57, 128.41, 128.31, 127.99, 127.88, 127.48, 127.43, 127.37, 126.66, 126.32, 126.28, 126.16, 126.05, 125.94, 35.20, 35.18, 34.50, 34.48, 26.04, 25.87; **MS (ESI)**: found  $[\text{M}+\text{H}]^+$  473.2, 475.2

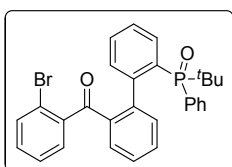

colorless oil;  $^{31}\text{P NMR}$  (162 MHz,  $\text{CDCl}_3$ )  $\delta$ : 41.32, 39.17;  $^1\text{H NMR}$  (400 MHz,  $\text{CDCl}_3$ )  $\delta$ : 7.92-7.87 (m, 0.9H), 7.80 (dd,  $J = 7.6$  Hz, 1.6 Hz, 0.4H), 7.60-7.53 (m, 2.0 H), 7.51-7.46 (m, 1.6H), 7.44-7.07 (m, 11.1H), 7.01 (dt,  $J = 7.6$  Hz, 1.2 Hz, 0.5H), 6.39 (d,  $J = 7.6$  Hz), 1.26 (t,  $J = 14.6$  Hz, 9.0H),  $^{13}\text{C NMR}$  (100 MHz,  $\text{CDCl}_3$ )  $\delta$ : 196.07, 195.17, 147.45, 147.39, 147.02, 146.97, 141.98, 141.94, 141.5, 141.21, 141.18, 141.11, 137.02, 135.24, 133.61, 132.90, 132.83, 132.77, 132.73, 132.49, 132.27, 132.18, 132.03, 131.99, 131.90, 131.73, 131.65, 131.56, 131.28, 130.99, 130.86, 130.71, 130.68, 130.65, 130.61, 130.53, 130.51, 130.46, 130.41, 130.36, 130.15, 129.75, 129.12, 128.86, 128.23, 127.74, 127.63, 127.41, 127.30, 126.93, 126.86, 125.95, 125.83, 125.79, 125.68, 119.82, 119.66, 34.90, 34.20, 26.07, 26.02; **MS (ESI)**: found  $[\text{M}+\text{H}]^+$  517.2, 519.2

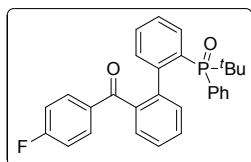

colorless oil;  $^{31}\text{P NMR}$  (162 MHz,  $\text{CDCl}_3$ )  $\delta$ : 40.54, 39.31;  $^1\text{H NMR}$  (400 MHz,  $\text{CDCl}_3$ )  $\delta$ : 8.06 (dd,  $J = 8.6$  Hz, 5.6 Hz, 0.8H), 7.91-7.87 (m, 0.4H), 7.79-7.72 (m, 1.7H), 7.62-7.57 (m, 1.0H), 7.52-7.19 (m, 9.3H), 7.11-7.07 (m, 1.6H), 7.01 (t,  $J = 8.7$  Hz, 1.0H), 6.84 (t,  $J = 8.7$  Hz, 1.0H), 6.56 (d,  $J = 7.7$  Hz, 0.4H), 1.23-1.13 (m, 9.0H);  $^{13}\text{C NMR}$  (100 MHz,  $\text{CDCl}_3$ )  $\delta$ : 197.06, 195.47, 166.51, 166.30, 163.99, 163.79, 146.76, 146.71, 145.90, 145.86, 141.66, 141.63, 140.18, 140.15,

138.26, 137.44, 134.26, 133.94, 133.92, 133.59, 133.49, 133.47, 133.38, 133.33, 133.24, 133.06, 132.11, 132.03, 131.92, 131.79, 131.71, 131.67, 131.59, 131.24, 130.90, 130.87, 130.79, 130.74, 130.69, 130.57, 130.54, 130.20, 129.81, 129.30, 128.93, 128.54, 128.52, 128.18, 127.97, 127.86, 127.48, 127.37, 127.12, 126.64, 126.22, 126.09, 125.93, 125.81, 114.98, 114.77, 114.71, 114.49, 35.18, 35.15, 34.48, 34.45, 26.00, 25.82; **<sup>19</sup>F NMR** (376 Hz, CDCl<sub>3</sub>) δ: -106.29, -106.61; **MS (ESI)**: found [M+H]<sup>+</sup> 457.1

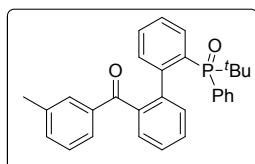

colorless oil; **<sup>31</sup>P NMR** (162 MHz, CDCl<sub>3</sub>) δ: 40.93, 39.72; **<sup>1</sup>H NMR** (400 MHz, CDCl<sub>3</sub>) δ: 7.91-7.84 (m, 1.0H), 7.79-7.77 (m, 0.7H), 7.65 (d, *J* = 8.8 Hz, 0.8H), 7.58 (d, *J* = 7.6 Hz, 0.6H), 7.53-7.38 (m, 6.6H), 7.32-7.20 (m, 3.6H), 7.18-7.13 (m, 1.5H), 7.07-7.03 (m, 1.2H), 7.69 (d, *J* = 7.7 Hz, 0.4H), 2.35-2.19 (m, 3.0H), 1.26-1.12 (m, 9.0H); **<sup>13</sup>C NMR** (100 MHz, CDCl<sub>3</sub>) δ: 198.57, 196.75, 146.79, 146.73, 146.30, 146.26, 141.75, 141.72, 140.59, 138.36, 138.18, 138.00, 137.56, 137.04, 134.12, 134.03, 133.24, 133.20, 133.15, 132.95, 132.09, 131.98, 131.94, 131.85, 131.76, 131.67, 131.06, 131.02, 130.95, 130.89, 130.74, 130.39, 130.37, 130.34, 130.20, 129.83, 129.37, 128.94, 128.55, 128.52, 128.19, 128.02, 127.99, 127.91, 127.83, 127.67, 127.26, 127.15, 126.52, 126.17, 126.10, 125.97, 125.86, 35.28, 35.11, 34.58, 34.41, 26.06, 26.02, 21.21, 21.19; **MS (ESI)**: found [M+H]<sup>+</sup> 453.2

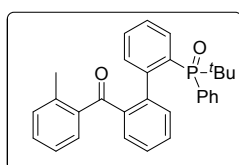

colorless oil; **<sup>31</sup>P NMR** (162 MHz, CDCl<sub>3</sub>) δ: 40.39, 39.14; **<sup>1</sup>H NMR** (400 MHz, CDCl<sub>3</sub>) δ: 7.96-7.88 (m, 1.0H), 7.73 (d, *J* = 7.2 Hz, 0.4H), 7.61-7.52 (m, 2.6H), 7.48-7.34 (m, 4.8H), 7.30-7.19 (m, 3.4H), 7.17-7.03 (m, 4.6H), 6.53 (d, *J* = 7.5 Hz, 0.4H), 2.26-2.23 (m, 3.0H), 1.30-1.17 (m, 9.0H); **<sup>13</sup>C NMR** (100 MHz, CDCl<sub>3</sub>) δ: 199.53, 198.20, 147.44, 147.39, 146.96, 146.91, 141.88, 141.84, 141.12, 139.13, 139.06, 138.76, 137.56, 137.42, 137.13, 133.90, 133.45, 133.35, 133.02, 132.51, 132.42, 132.36, 132.01, 131.92, 131.83, 131.74, 131.22, 131.06, 130.92, 130.83, 130.78, 130.68, 130.58, 130.52, 130.50, 130.46, 130.42, 130.40, 130.24, 130.18, 130.08, 129.73, 129.31, 129.23, 128.84, 128.34, 127.88, 127.77, 127.33, 127.21, 126.73, 126.63, 125.93, 125.83, 125.72, 125.13, 124.87, 35.16, 35.00, 34.46, 34.30, 26.09, 26.07, 20.24, 20.13; **MS (ESI)**: found [M+H]<sup>+</sup> 453.2

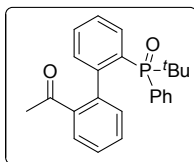

colorless oil;  $^{31}\text{P}$  NMR (162 MHz,  $\text{CDCl}_3$ )  $\delta$ : 40.54, 39.31;  $^1\text{H}$  NMR (400 MHz,  $\text{CDCl}_3$ )  $\delta$ : 8.10-8.06 (m, 0.5H), 7.77-7.72 (m, 0.5H), 7.67-7.25 (m, 9.5H), 7.22-7.18 (m, 1.5H), 6.86-6.82 (m, 0.5H), 6.18 (d,  $J = 7.0$  Hz, 0.5H), 2.33 (s, 1.6H), 2.22 (s, 1.3H), 1.30-1.19 (m, 9.0H);  $^{13}\text{C}$  NMR (100 MHz,  $\text{CDCl}_3$ )  $\delta$ : 201.51, 199.58, 148.28, 148.23, 148.01, 147.96, 140.55, 139.79, 139.17, 137.39, 133.41, 132.86, 132.77, 132.51, 132.44, 132.41, 132.14, 132.02, 131.98, 131.90, 131.66, 131.57, 130.88, 130.85, 130.74, 130.71, 130.67, 130.64, 130.58, 130.55, 130.52, 130.12, 129.89, 129.21, 129.00, 128.21, 128.16, 127.77, 127.56, 127.32, 127.22, 126.97, 126.19, 126.08, 125.68, 125.56, 34.87, 34.68, 34.17, 33.98, 29.54, 28.71, 25.92, 25.90; **MS (ESI)**: found  $[\text{M}+\text{H}]^+$  377.1

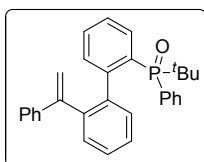

White solid:  $^{31}\text{P}$  NMR (162 MHz,  $\text{CDCl}_3$ )  $\delta$ : 38.14, 37.74;  $^1\text{H}$  NMR (400 MHz,  $\text{CDCl}_3$ )  $\delta$ : 7.99-7.95 (m, 0.6H), 7.85-7.81 (m, 0.7H), 7.69 (dd,  $J = 8.1$  Hz, 10.3 Hz, 0.4H), 7.55-7.15 (m, 11.7H), 7.06-7.02 (m, 1.0H), 7.00-6.91 (m, 1.2H), 6.86-6.80 (m, 1.7H), 6.25 (d,  $J = 7.5$  Hz, 0.6H), 5.45 (dd,  $J = 28.6$  Hz, 1.5 Hz, 1.2H), 4.93 (dd,  $J = 1.1$  Hz, 12.2 Hz, 0.7H), 1.24-1.14 (m, 9.0H);  $^{13}\text{C}$  NMR (100 MHz,  $\text{CDCl}_3$ )  $\delta$ : 148.56, 147.83, 147.56, 147.51, 147.44, 142.09, 140.74, 140.71, 140.68, 139.82, 134.06, 133.38, 133.29, 133.18, 133.01, 132.67, 132.58, 132.13, 132.09, 132.01, 131.96, 131.87, 131.37, 131.26, 130.76, 130.70, 130.68, 130.58, 130.47, 130.11, 130.09, 129.97, 129.88, 129.68, 129.63, 129.40, 129.38, 129.30, 128.66, 127.75, 127.65, 127.34, 127.21, 127.04, 126.83, 126.82, 126.74, 126.51, 125.98, 125.55, 125.51, 125.40, 125.17, 125.06, 117.92, 117.39, 35.45, 35.07, 34.75, 34.37, 25.97, 25.74; **MS (ESI)**: found  $[\text{M}+\text{H}]^+$  437.2

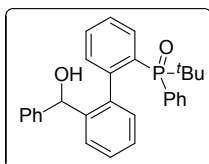

White solid:  $^{31}\text{P}$  NMR (162 MHz,  $\text{CDCl}_3$ )  $\delta$ : 43.23;  $^1\text{H}$  NMR (400 MHz,  $\text{CDCl}_3$ )  $\delta$ : 8.02-7.97 (m, 1H), 7.44-7.40 (m, 2H), 7.33-7.14 (m, 7H), 7.06-6.98 (m, 6H), 6.55 (dt,  $J = 7.6$  Hz, 0.3 Hz, 1H), 6.19-6.16 (m, 1H), 5.87 (s, 1H), 5.72 (dd,  $J = 7.9$  Hz, 0.8 Hz, 1H), 1.36 (d,  $J = 14.5$  Hz, 9H);  $^{13}\text{C}$  NMR (100 MHz,  $\text{CDCl}_3$ )  $\delta$ : 146.75 (d,  $J = 5.3$  Hz), 144.96, 141.91, 138.38 (d,  $J = 3.5$  Hz), 133.08 (d,  $J = 9.1$  Hz), 131.91, 131.68 (d,  $J = 8.9$  Hz), 130.95, 130.87 (d,  $J = 22.3$  Hz), 129.99 (d,  $J = 2.3$

Hz), 129.58, 129.45 (d,  $J = 11.0$  Hz), 129.28, 128.83 (d,  $J = 89.4$  Hz), 127.56 (d,  $J = 11.5$  Hz), 127.16, 126.96, 125.52, 125.48, 125.36 (d,  $J = 11.5$  Hz), 76.95, 33.98 (d,  $J = 69.7$  Hz), 25.60; **MS (ESI)**: found  $[M+H]^+$  441.2

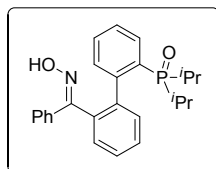

White solid:  **$^{31}\text{P}$  NMR** (162 MHz,  $\text{CDCl}_3$ )  $\delta$ : 43.23;  **$^1\text{H}$  NMR** (400 MHz,  $\text{CDCl}_3$ )  $\delta$ : 10.56 (d,  $J = 2.1$  Hz, 1H), 7.55-7.43 (m, 3H), 7.21-7.16 (m, 4H), 7.09 (t,  $J = 7.6$  Hz, 2H), 7.03-6.97 (m, 3H), 6.65 (dd,  $J = 7.6$  Hz, 2.5 Hz, 1H), 2.47-2.42 (m, 1H), 2.12-2.02 (m, 1H), 1.29-1.23 (m, 6H), 0.95 (dt,  $J = 8.1$  Hz, 7.1 Hz, 6H);  **$^{13}\text{C}$  NMR** (100 MHz,  $\text{CDCl}_3$ )  $\delta$ : 161.90, 145.95 (d,  $J = 4.3$  Hz), 140.84, 137.65, 133.77, 132.56 (d,  $J = 9.0$  Hz), 129.95, 129.88, 129.85, 129.78, 128.88, 128.52, 128.08, 127.57, 127.49, 127.09, 126.58, 126.47, 125.70, 28.00 (d,  $J = 67.5$  Hz), 24.23 (d,  $J = 66.5$  Hz), 16.66, 15.67 (d,  $J = 3.3$  Hz), 15.53 (d,  $J = 3.3$  Hz), 14.58 (d,  $J = 2.4$  Hz); **MS (ESI)**: found  $[M+H]^+$  406.2

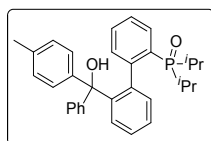

White solid:  **$^{31}\text{P}$  NMR** (162 MHz,  $\text{CDCl}_3$ )  $\delta$ : 57.60;  **$^1\text{H}$  NMR** (400 MHz,  $\text{CDCl}_3$ )  $\delta$ : 7.68 (s, 1H), 7.29-7.06 (m, 13H), 6.89-6.82 (m, 3H), 6.00 (dd,  $J = 7.7$  Hz, 3.0 Hz, 1H), 2.56-2.46 (m, 1H), 2.30 (s, 1H), 2.26-2.15 (m, 1H), 1.34-1.22 (m, 6H), 1.13-1.00 (m, 6H);  **$^{13}\text{C}$  NMR** (100 MHz,  $\text{CDCl}_3$ )  $\delta$ : 148.66 (d,  $J = 4.5$  Hz), 146.15 (d,  $J = 2.5$  Hz), 145.81, 141.42 (d,  $J = 3.0$  Hz), 135.89, 132.57 (d,  $J = 9.5$  Hz), 131.84, 130.00 (d,  $J = 10.8$  Hz), 129.26, 128.88 (d,  $J = 2.4$  Hz), 128.43, 128.23, 127.58, 127.16, 126.86, 126.36, 126.33, 125.69 (d,  $J = 13.9$  Hz), 124.88 (d,  $J = 11.2$  Hz), 80.90, 28.41 (d,  $J = 65.2$  Hz), 24.30 (d,  $J = 66.4$  Hz), 20.95, 16.49, 16.24 (d,  $J = 3.6$  Hz), 16.12 (d,  $J = 1.8$  Hz), 15.33 (d,  $J = 2.4$  Hz); **MS (ESI)**: found  $[M+H]^+$  483.2

### VIII. NMR charts

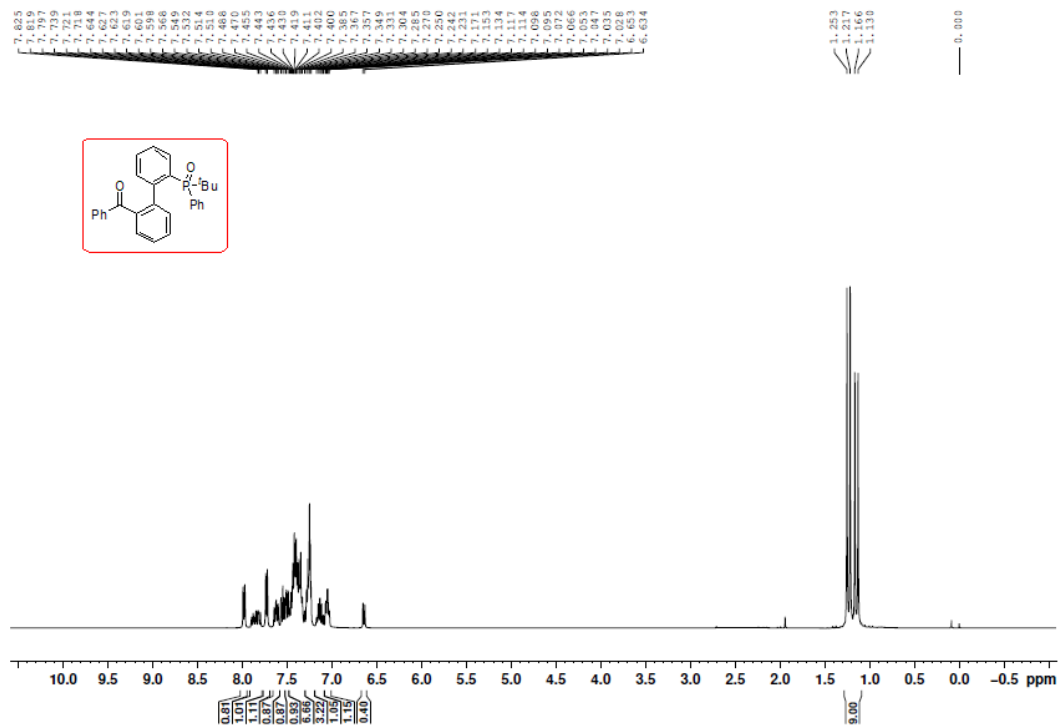



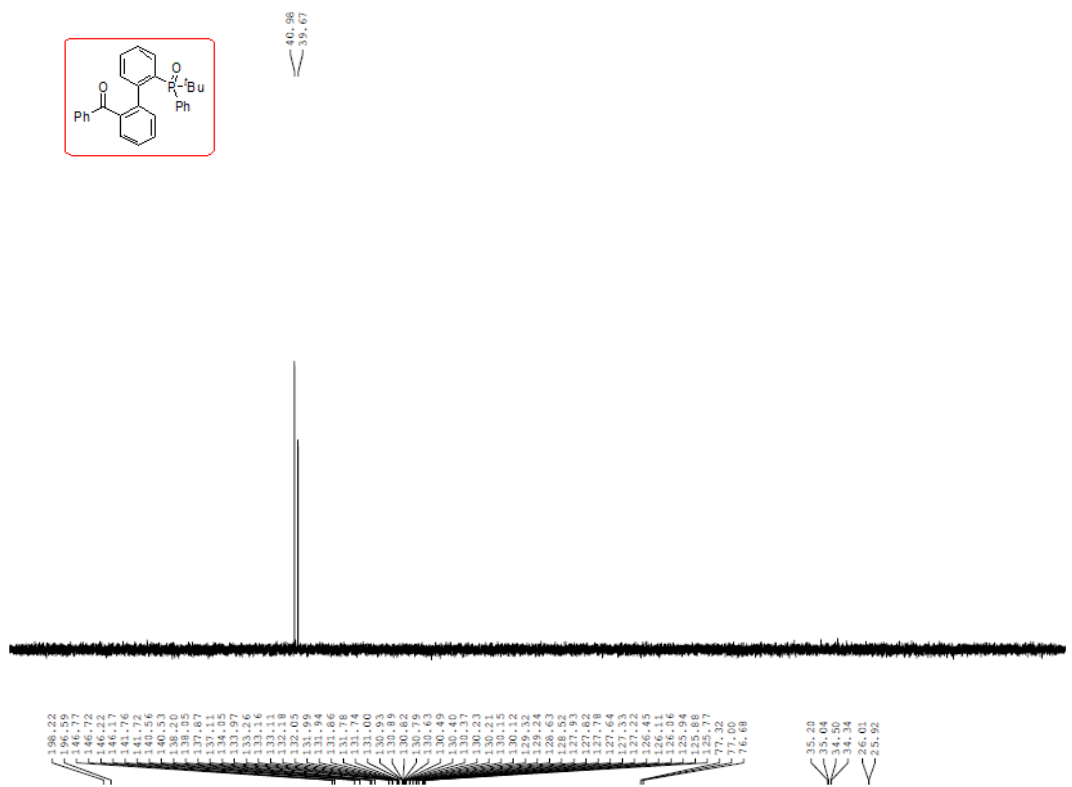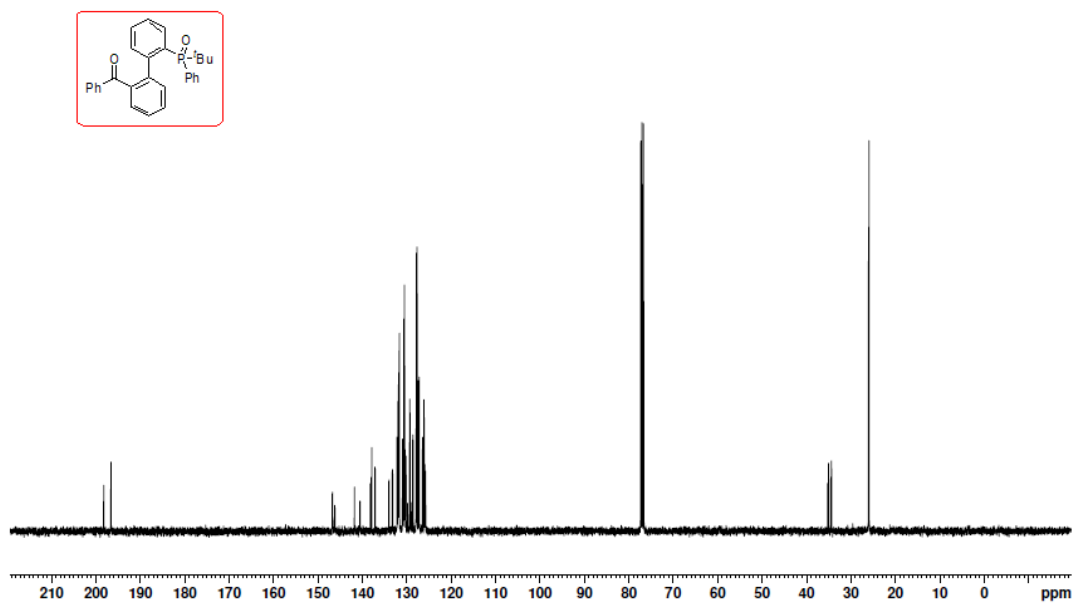

7.967  
7.949  
7.930  
7.910  
7.891  
7.487  
7.468  
7.449  
7.430  
7.427  
7.419  
7.400  
7.383  
7.369  
7.350  
7.335  
7.315  
7.300  
7.283

2.215  
2.198  
2.180  
2.163  
2.150  
2.132  
2.115  
2.098  
2.080  
2.063  
2.051  
2.045  
2.035  
2.021  
1.998  
1.980  
1.964  
1.947  
1.042  
1.031  
1.024  
1.011  
1.003  
0.993  
0.985  
0.970  
0.959  
0.571  
0.553  
0.000

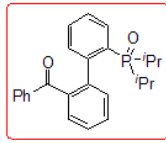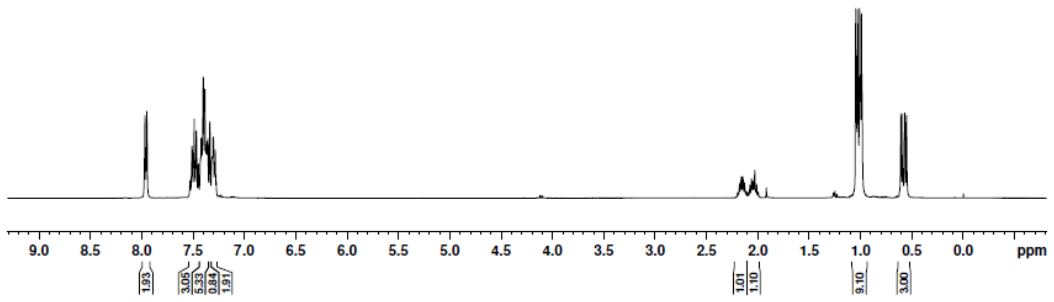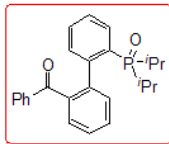

52.167

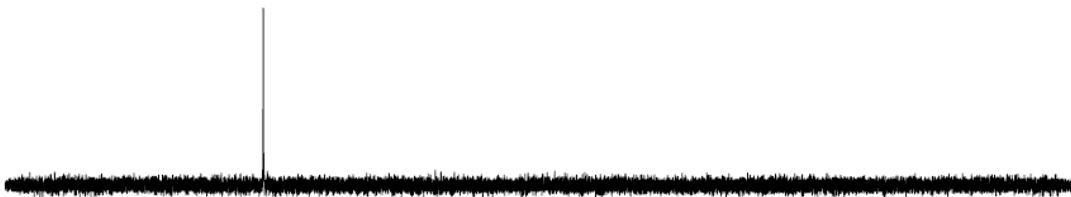

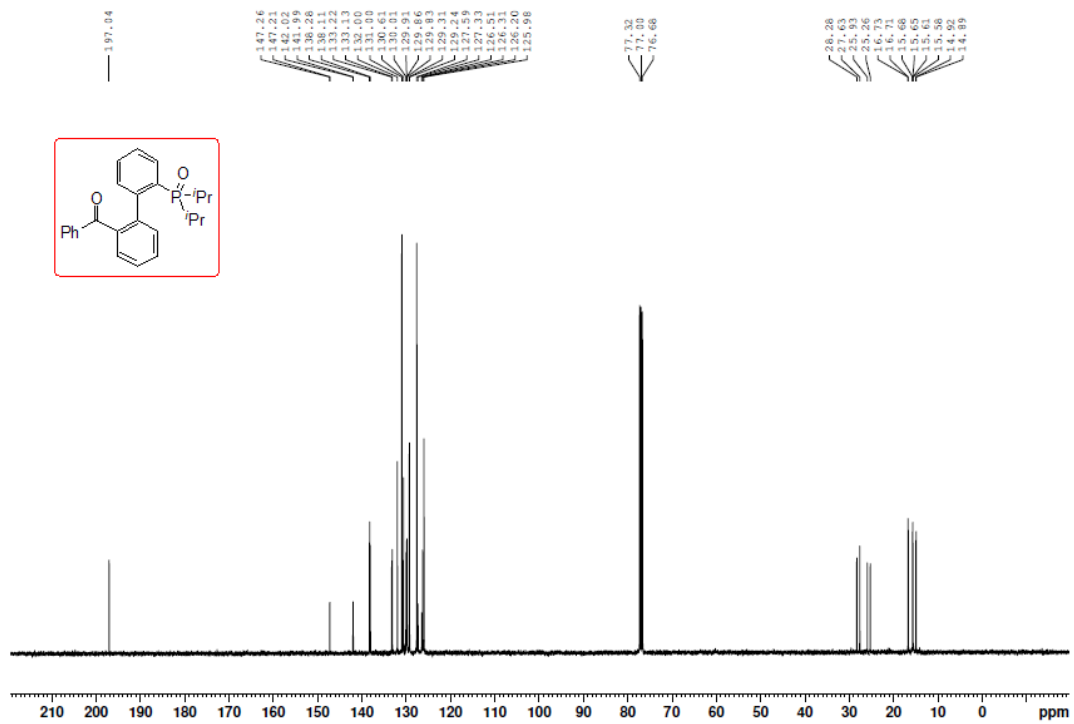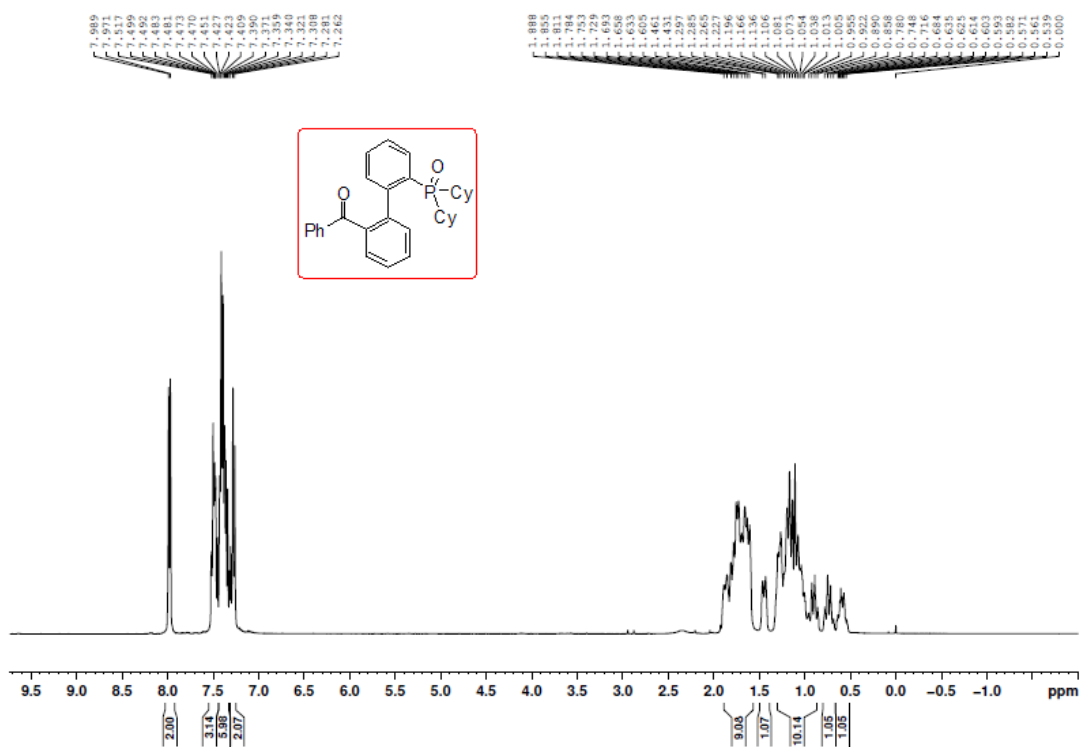

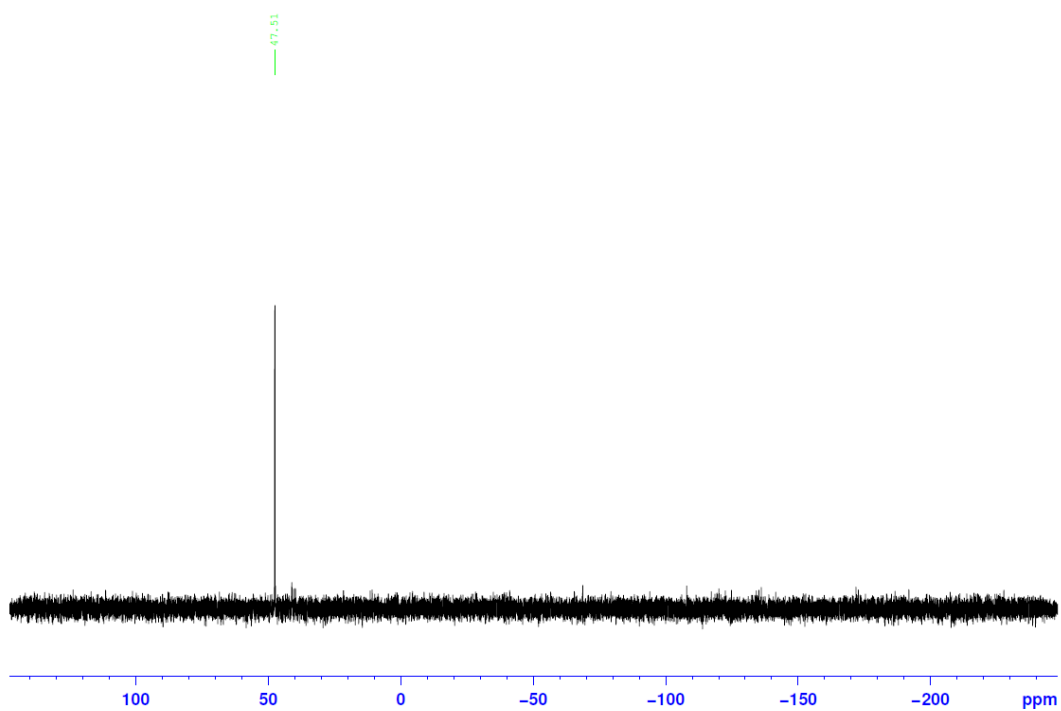

196.92

147.09  
147.04  
142.05  
142.02  
137.99  
137.94  
133.19  
133.10  
132.08  
132.04  
130.42  
129.83  
129.72  
129.71  
129.55  
129.20  
128.87  
127.52  
127.47  
126.27  
126.16  
125.80

77.32  
77.00  
76.69

38.29  
37.64  
36.52  
36.52  
26.52  
26.42  
26.39  
26.39  
26.17  
26.05  
25.70  
25.71  
25.31  
25.28  
24.64  
24.62  
24.53

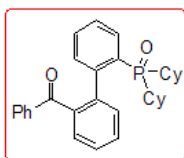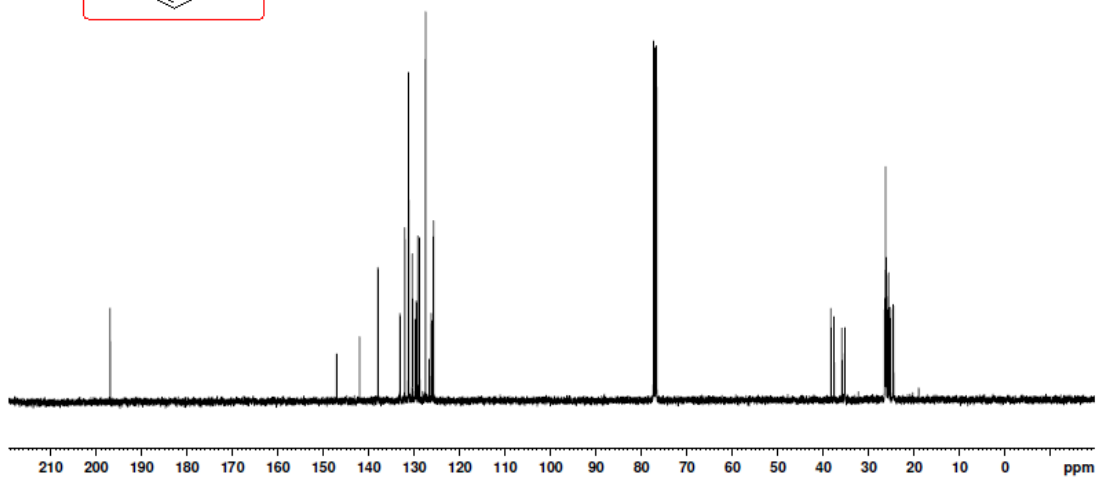

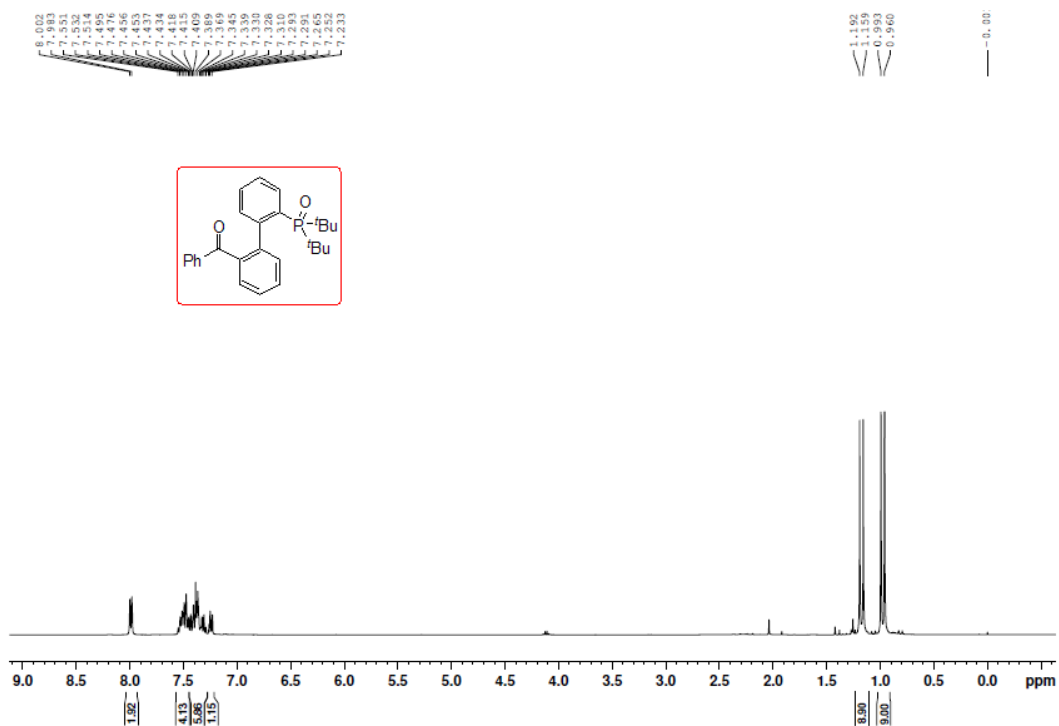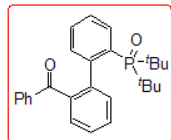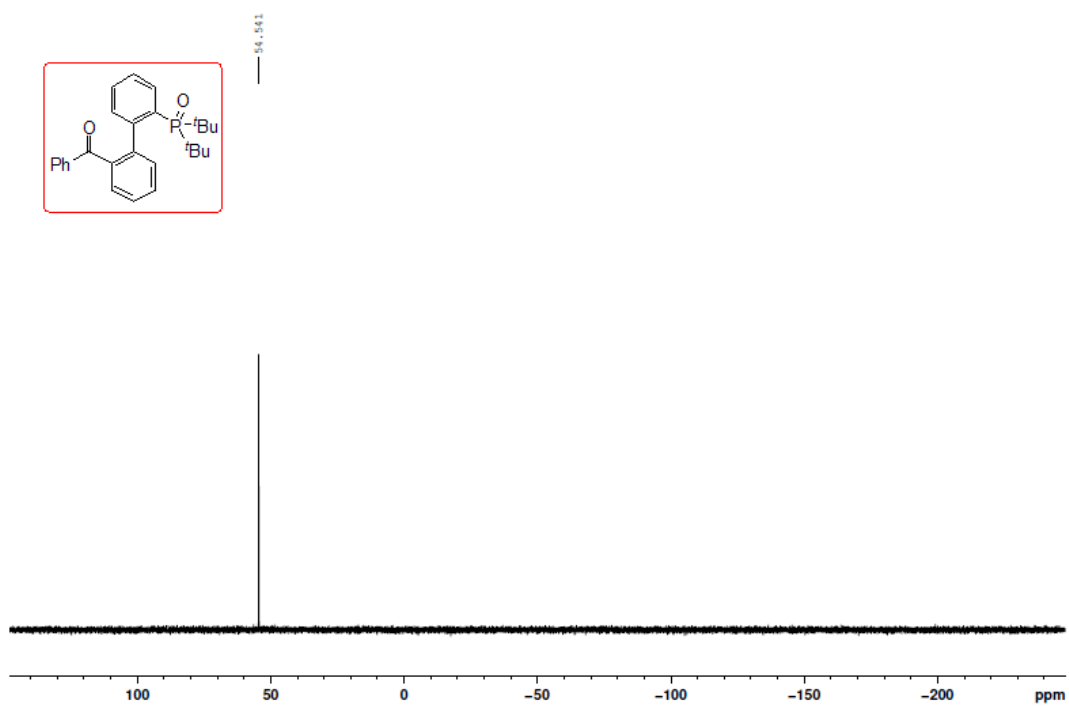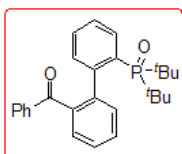

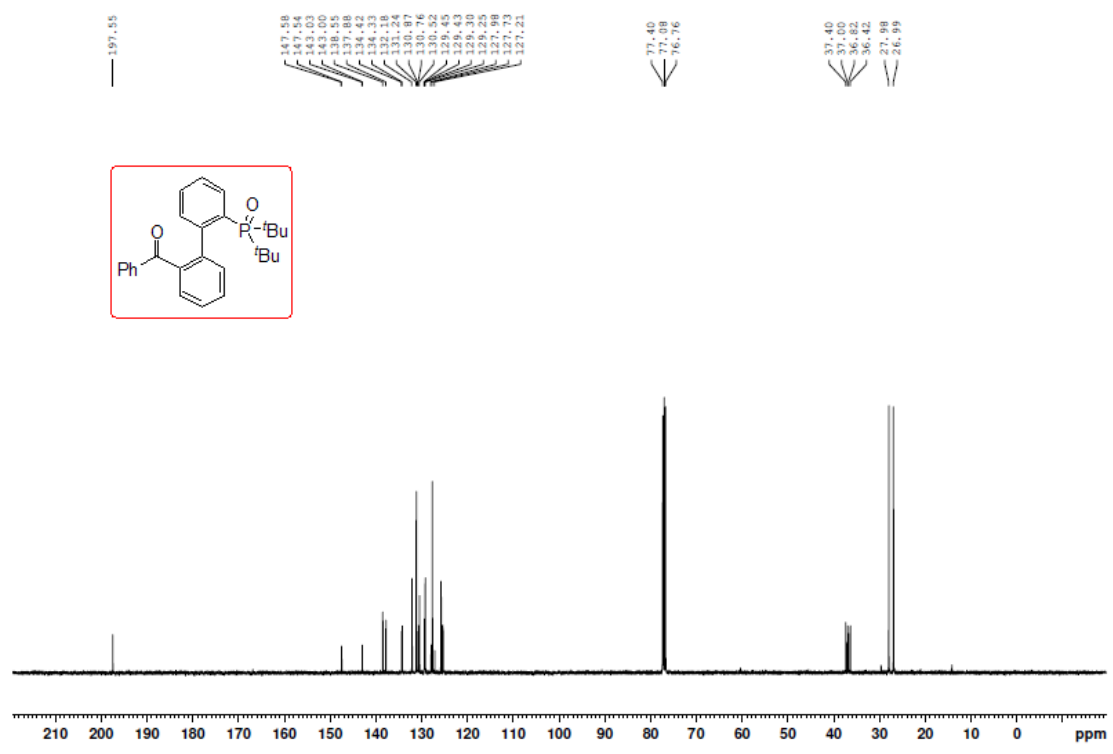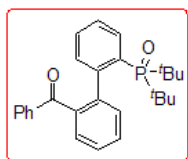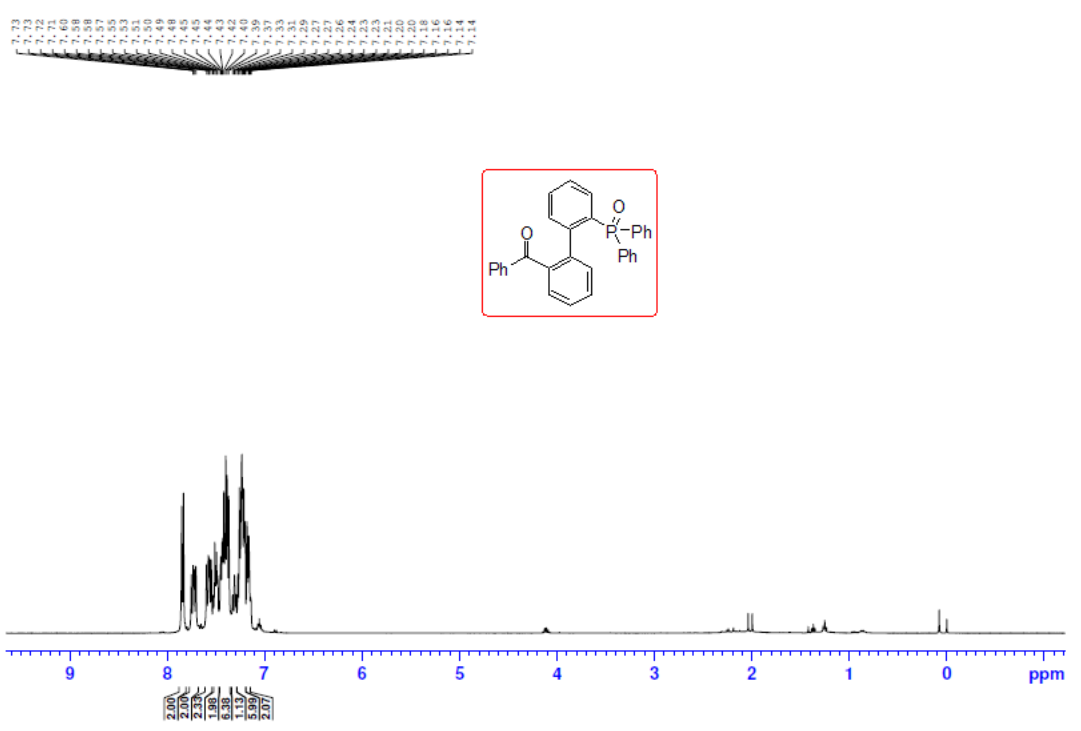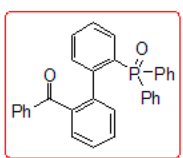

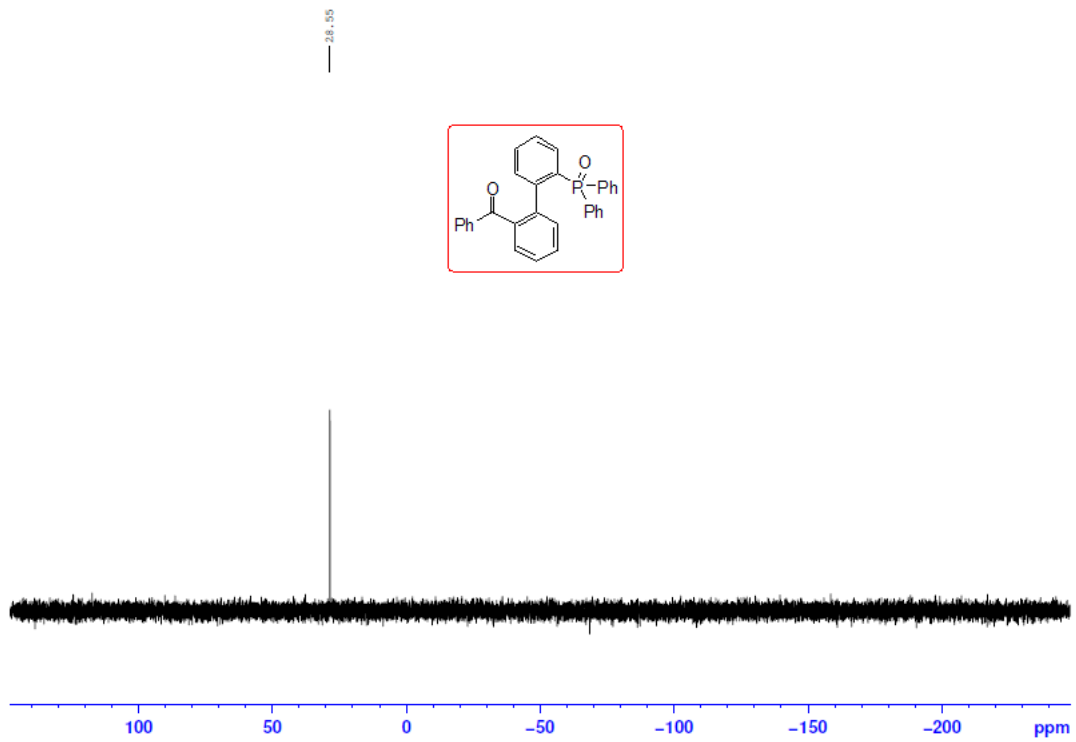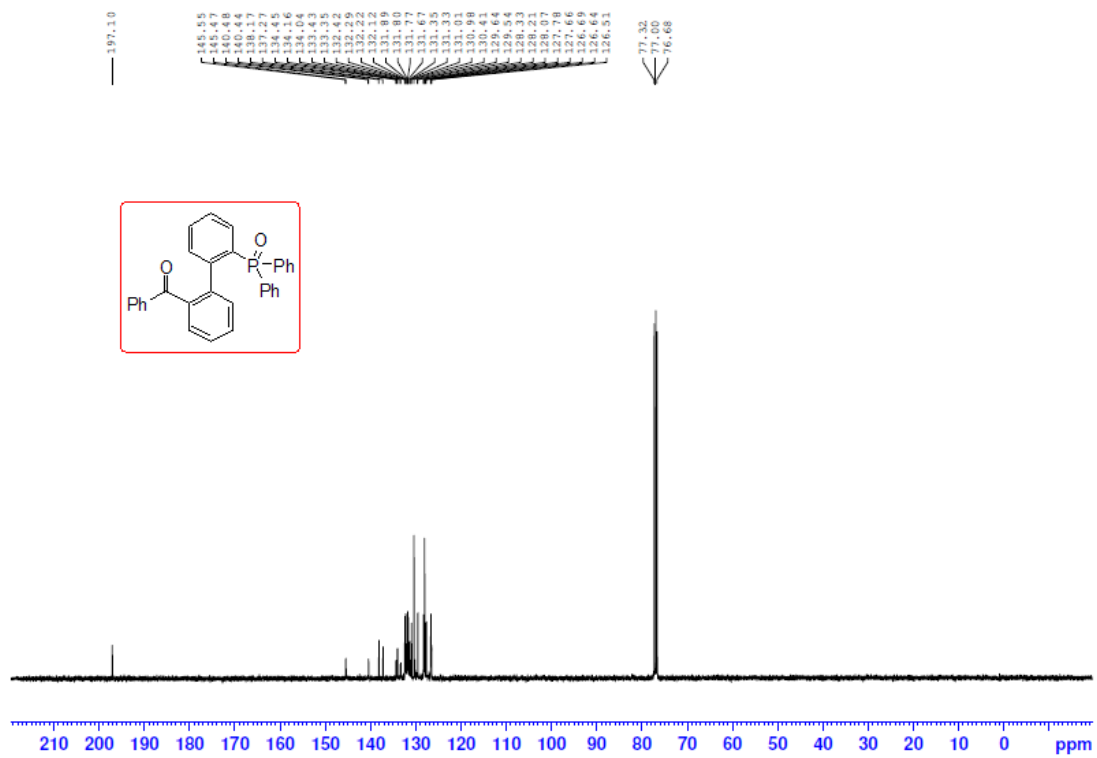

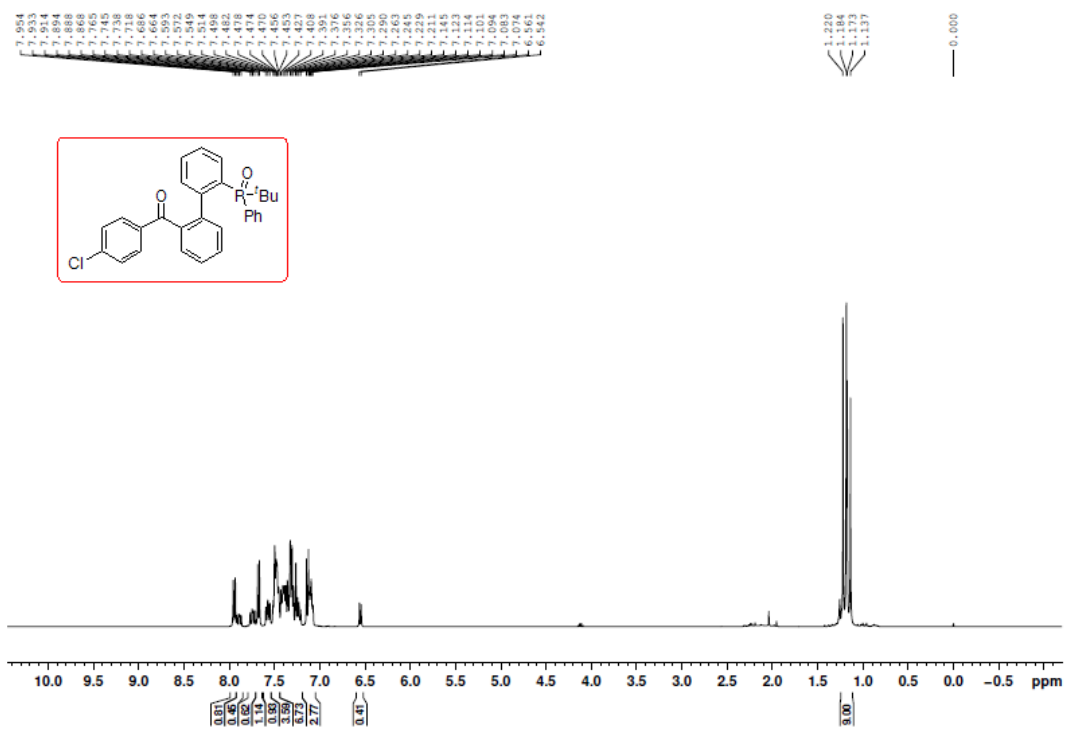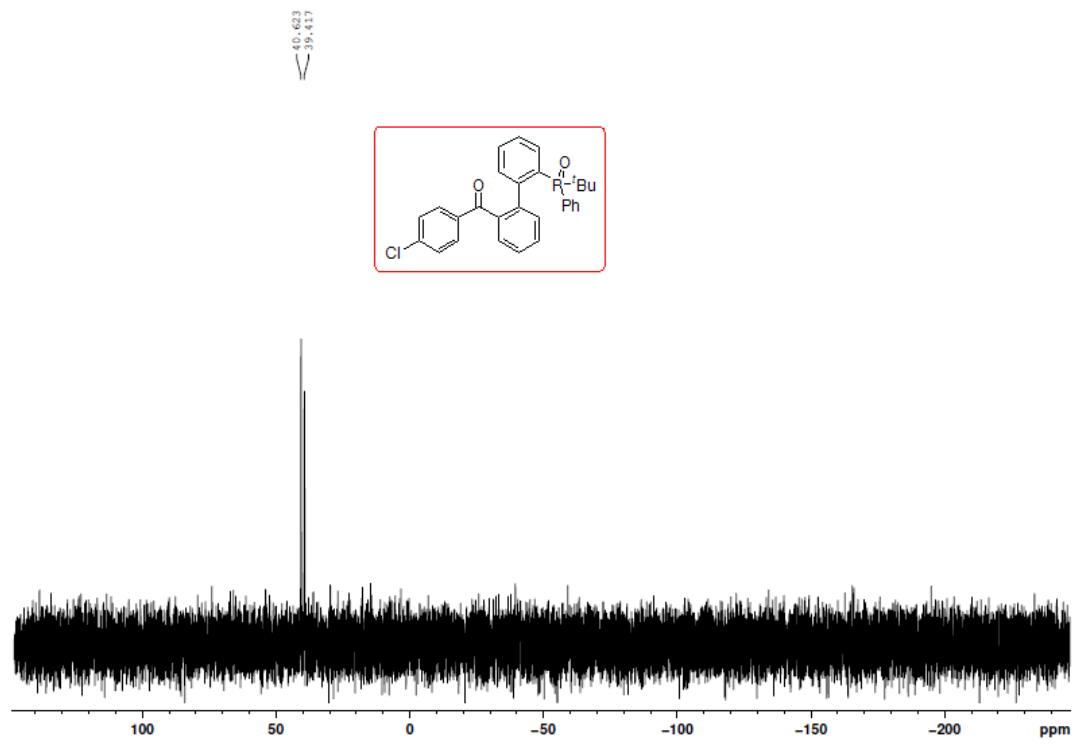



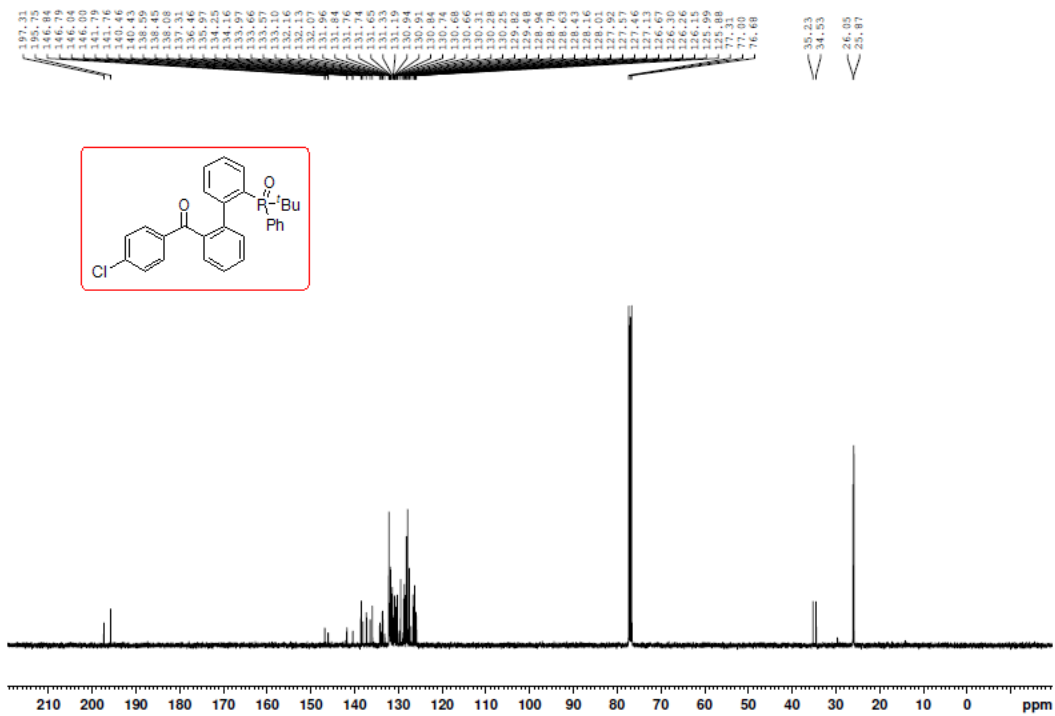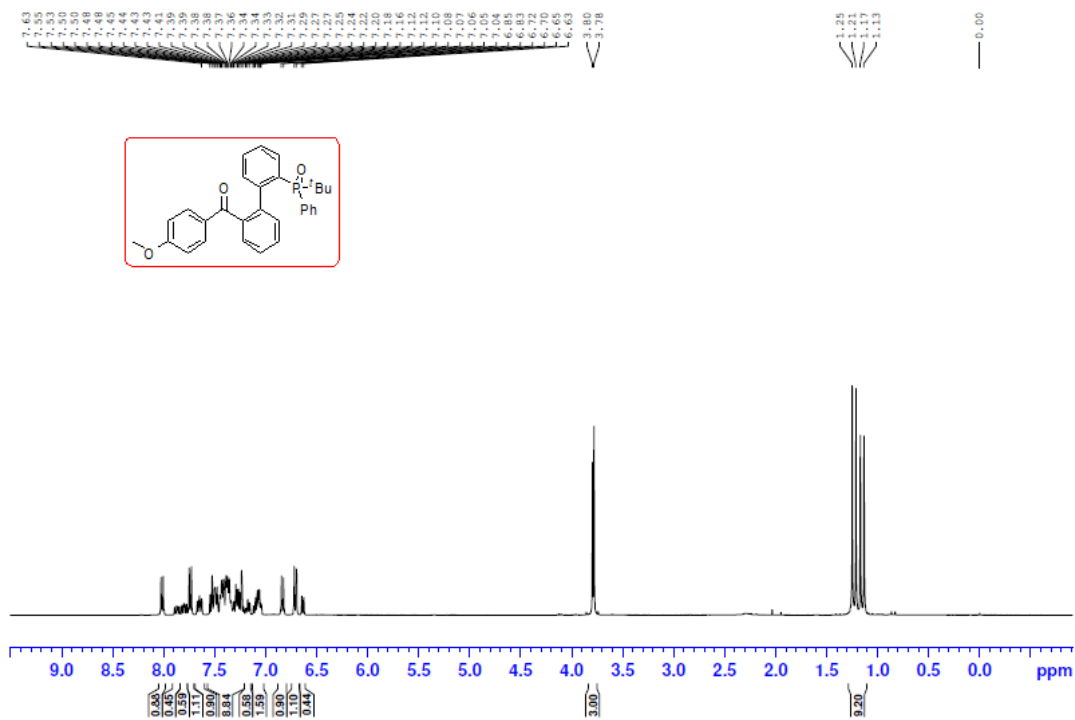

40.67  
39.43

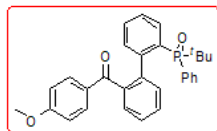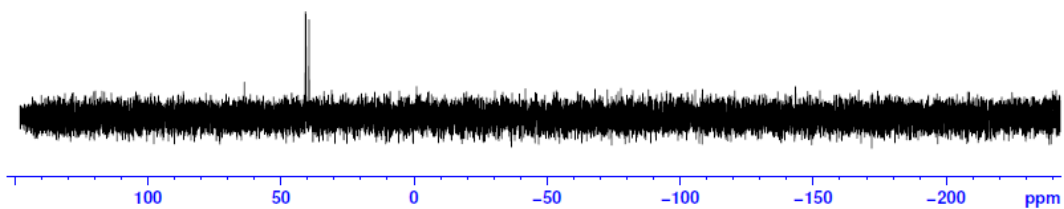

197.23  
195.56  
163.01  
162.01  
146.66  
146.66  
146.60  
146.10  
144.78  
144.78  
141.25  
141.25  
139.91  
139.91  
137.78  
137.25  
134.25  
134.10  
134.10  
133.48  
133.38  
133.38  
133.17  
133.17  
132.12  
132.09  
132.01  
132.01  
131.81  
131.81  
131.76  
131.68  
131.68  
131.59  
131.59  
130.95  
130.88  
130.88  
130.77  
130.77  
130.35  
130.17  
129.84  
129.84  
128.96  
128.78  
128.78  
128.06  
128.06  
128.07  
128.03  
128.00  
128.00  
127.70  
127.70  
127.34  
127.23  
127.23  
126.09  
126.09  
125.97  
125.90  
125.90  
113.12  
113.12  
112.53  
112.53  
77.32  
77.00  
76.00  
55.25  
55.23

35.28  
35.12  
34.58  
34.42  
28.99  
28.97

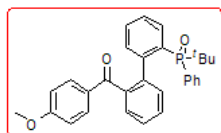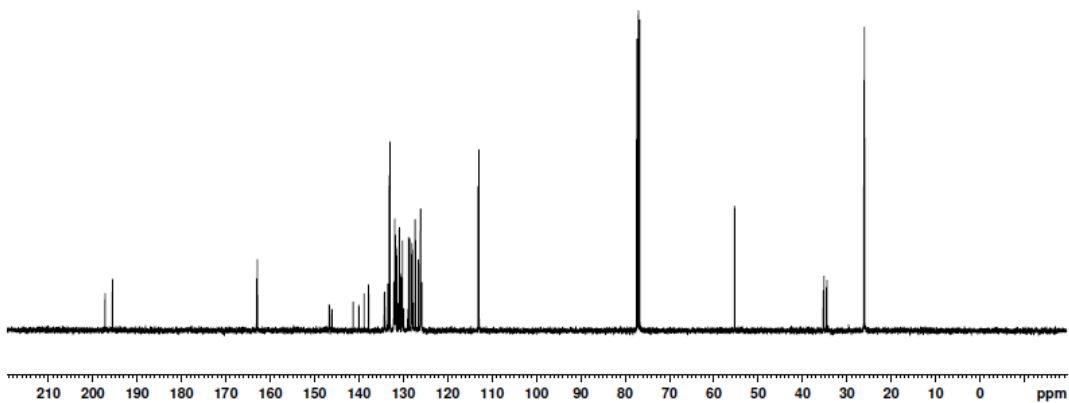

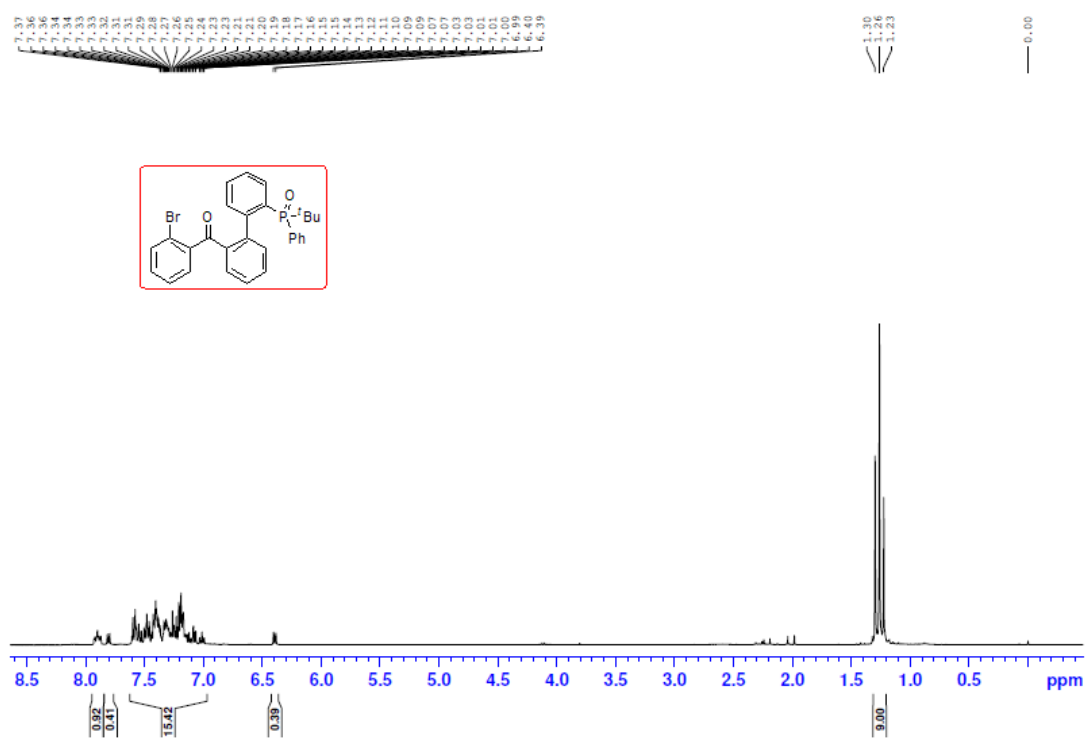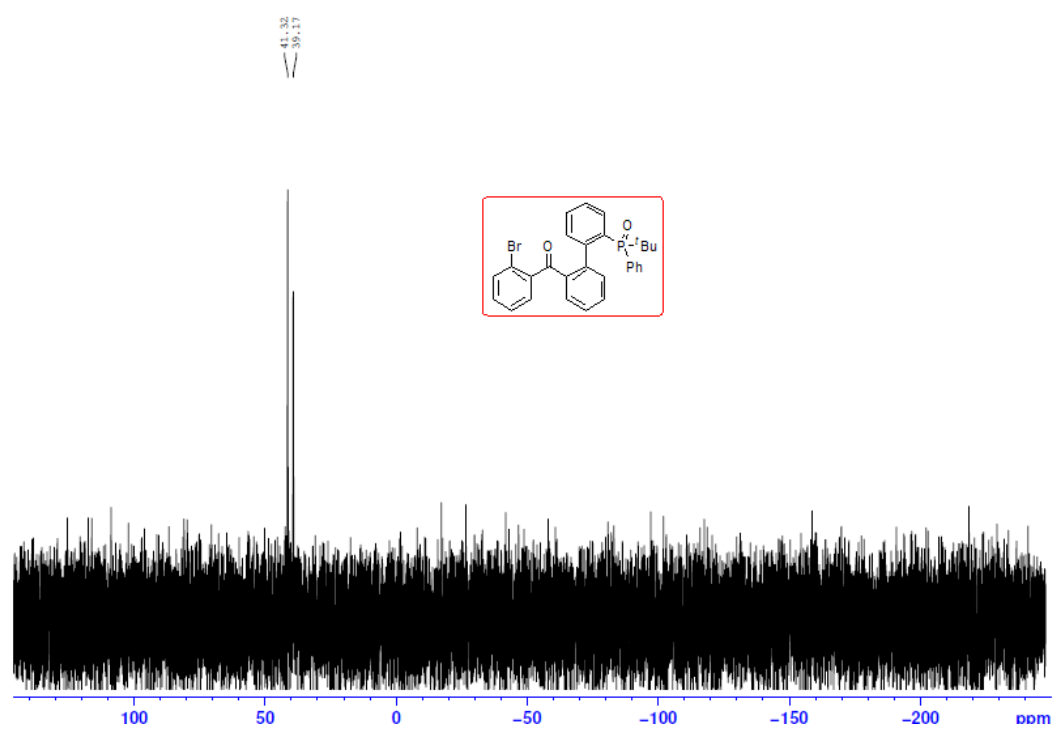

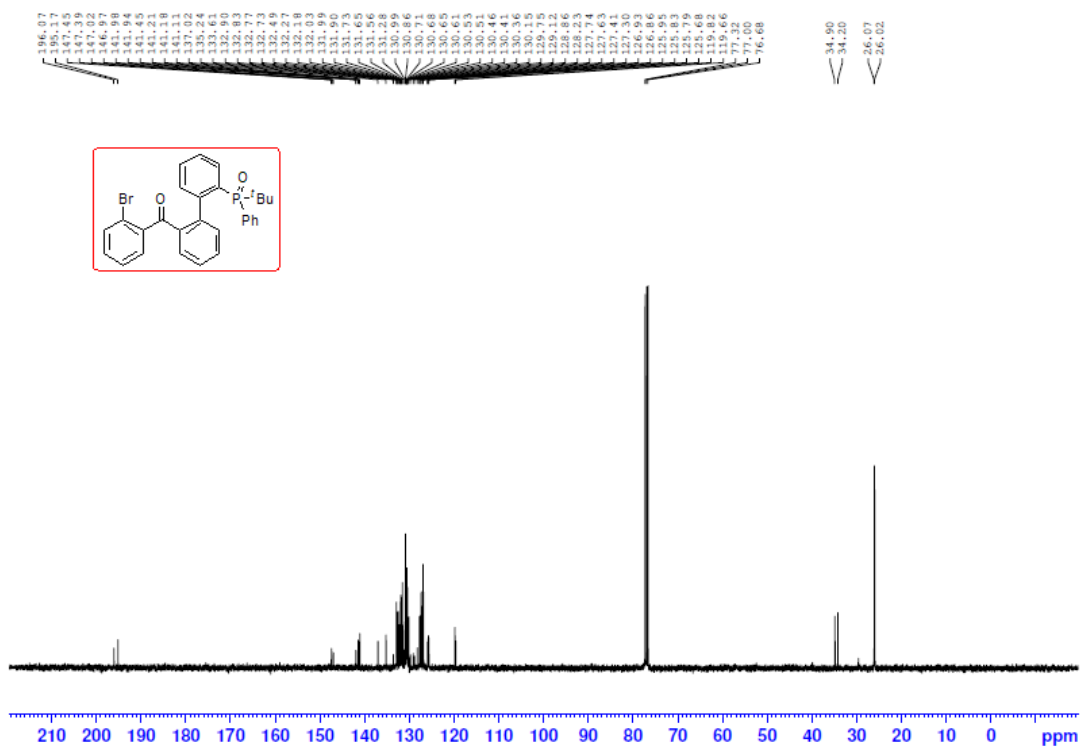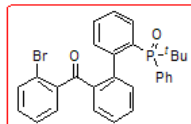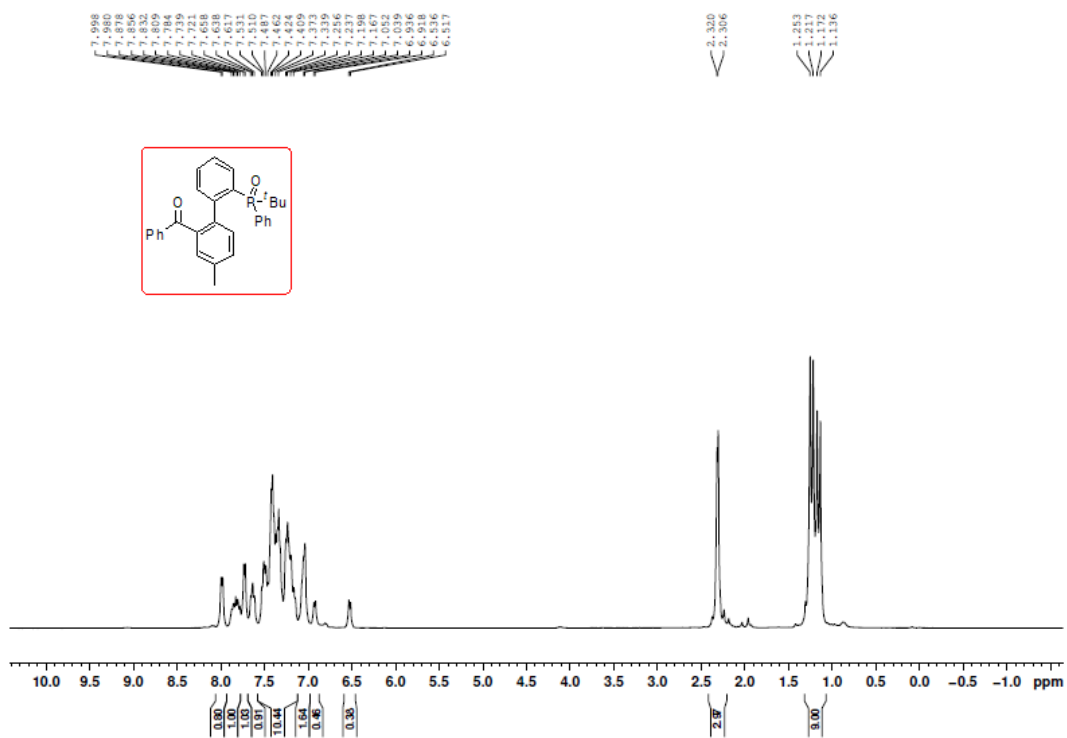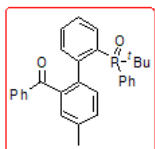

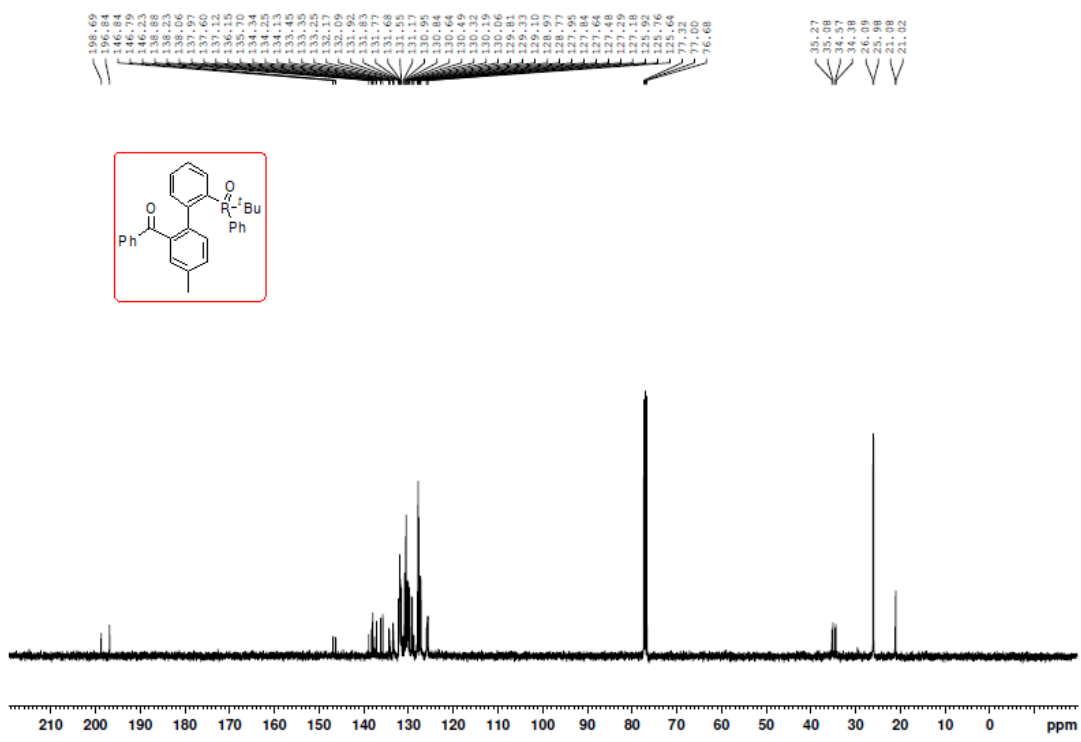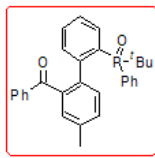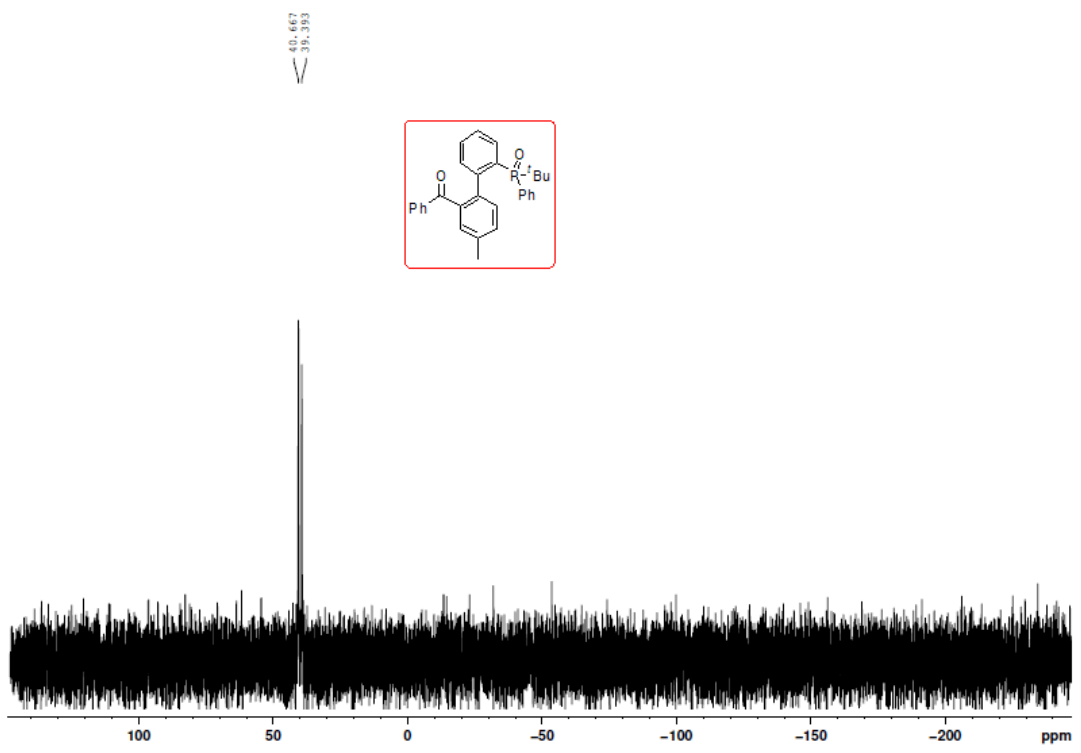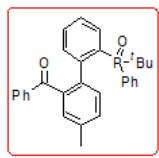

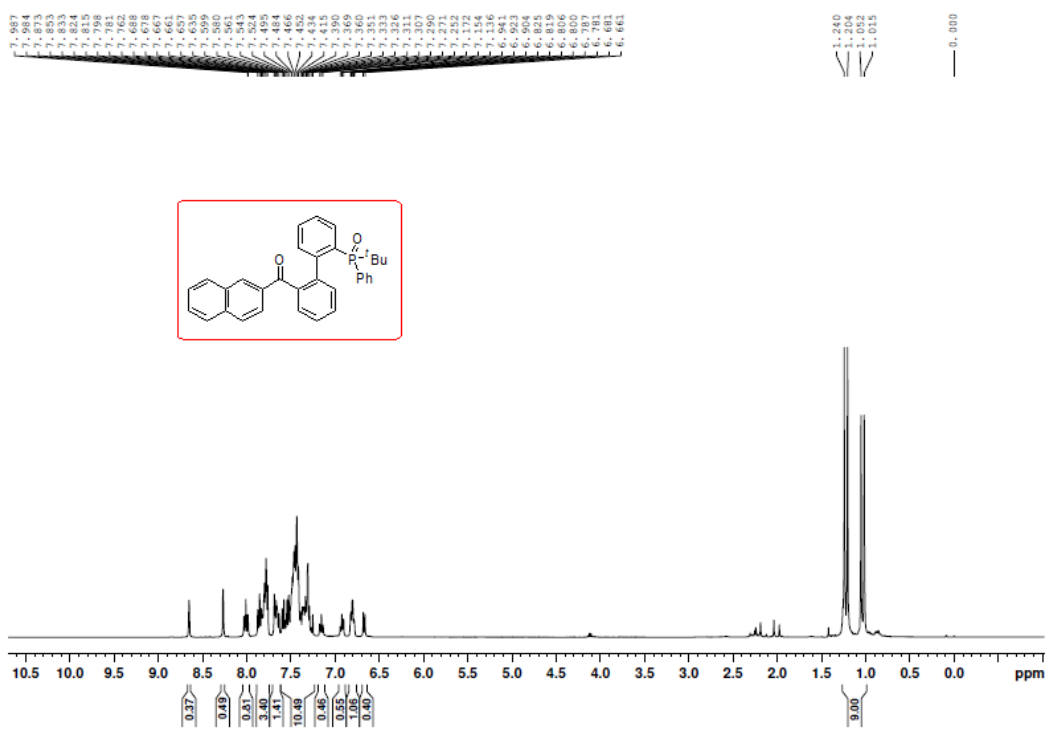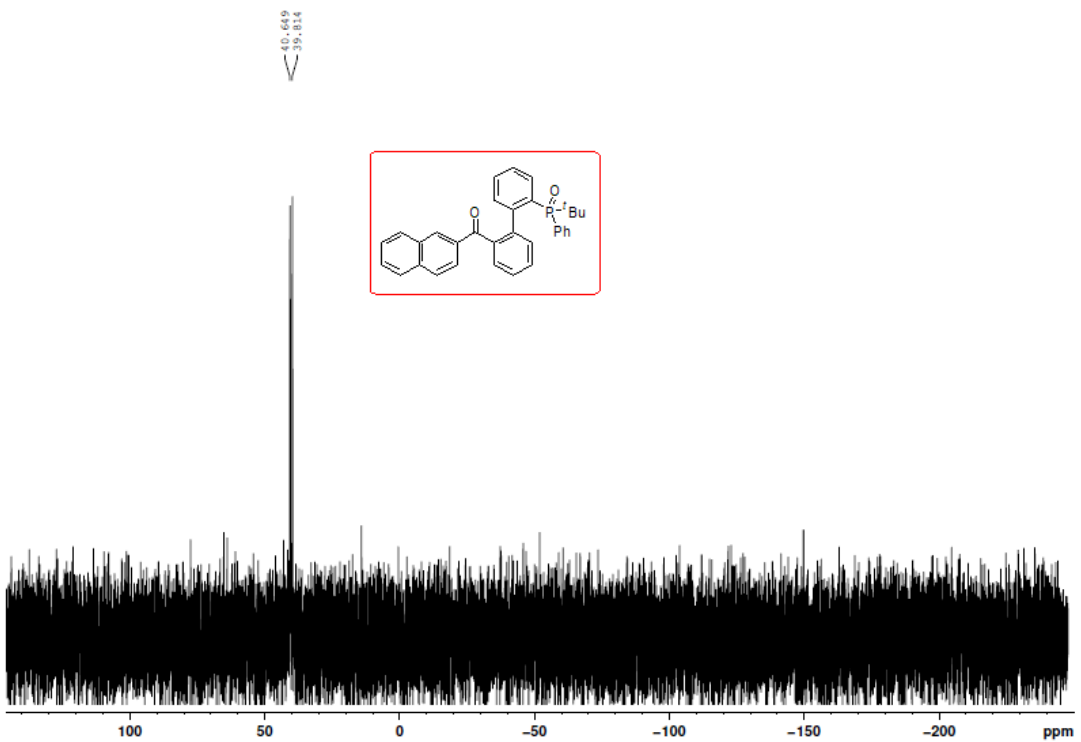

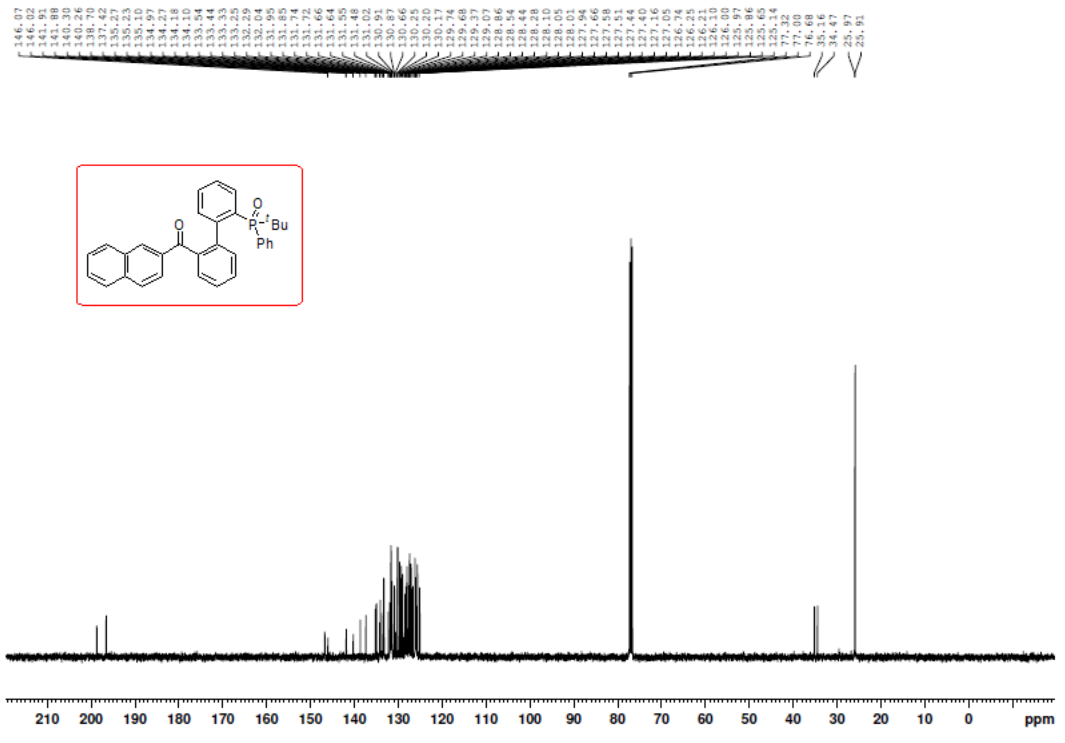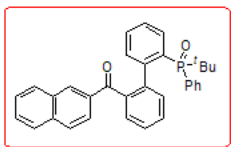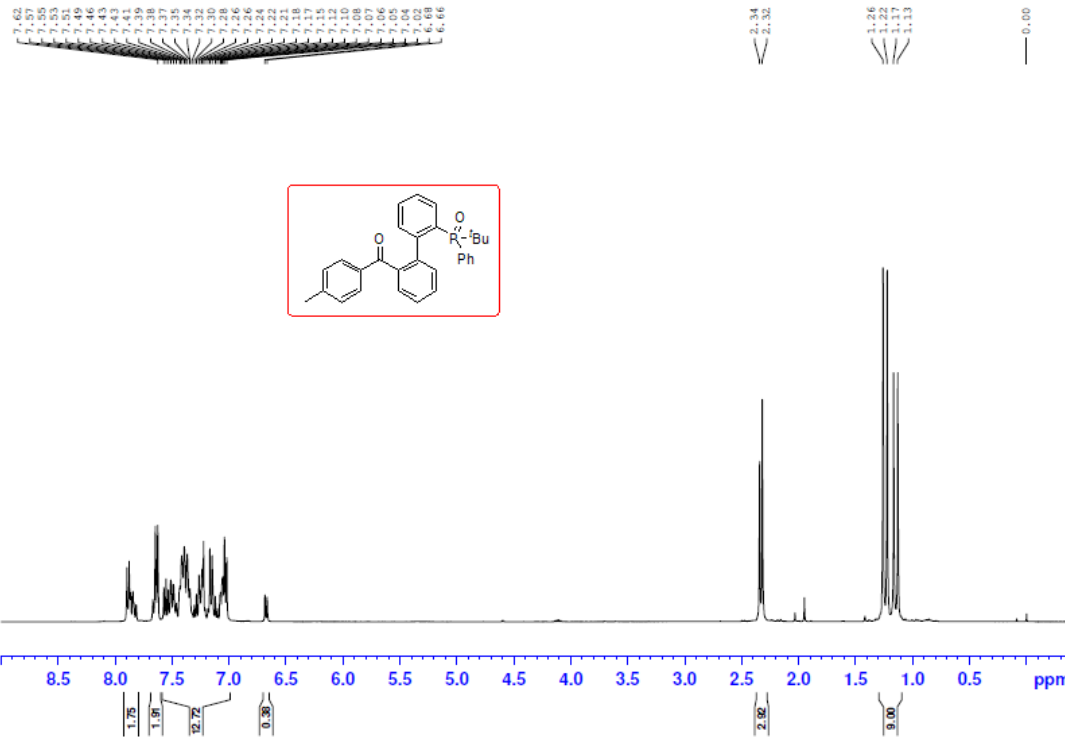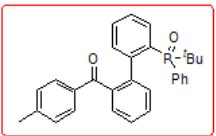

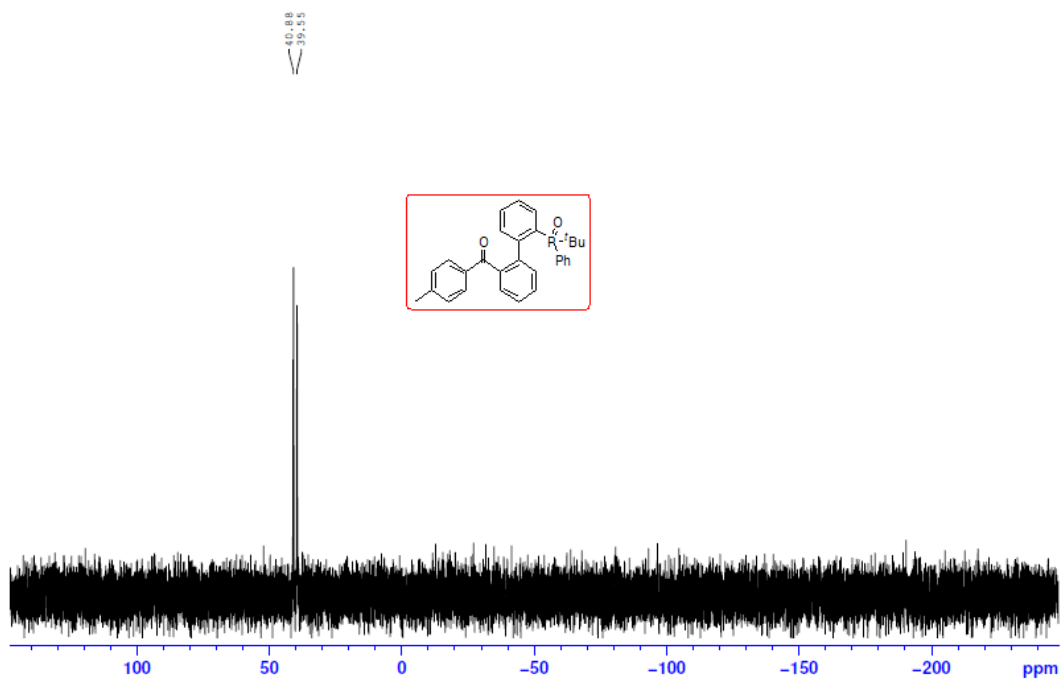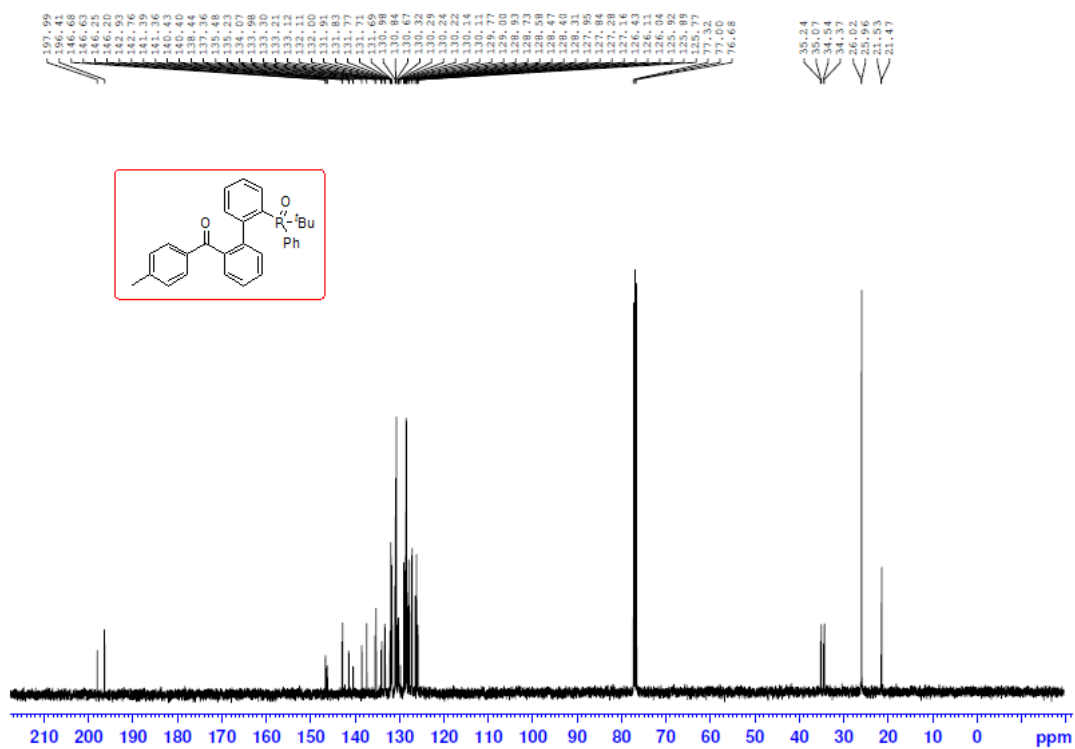



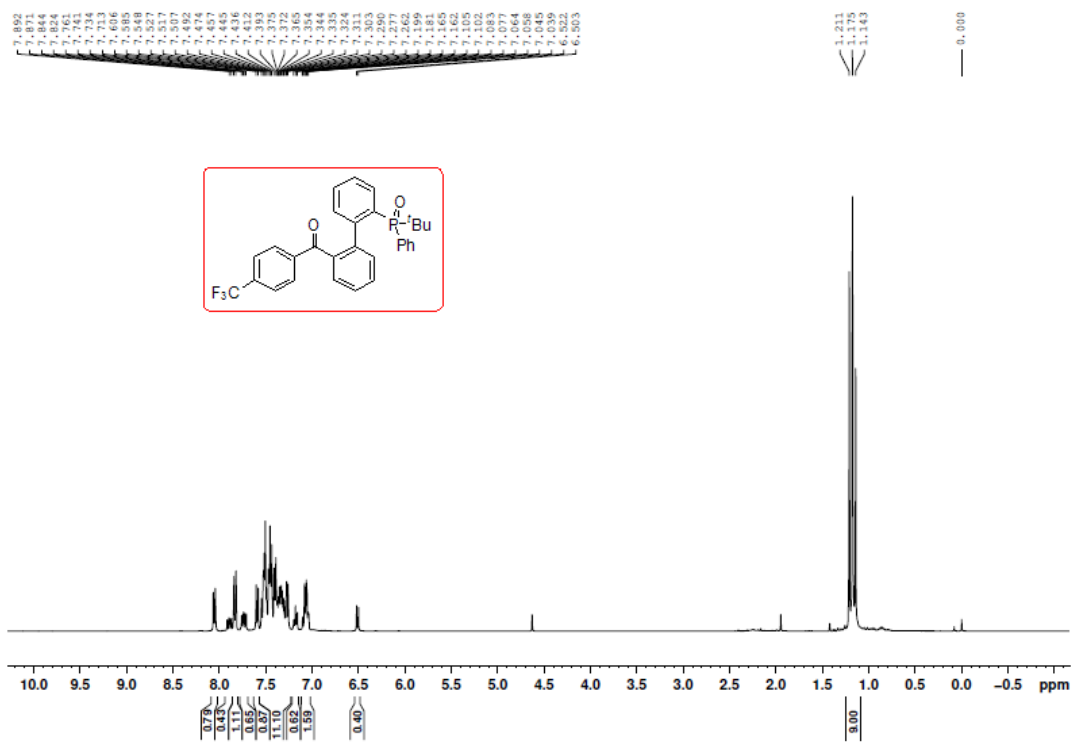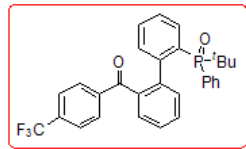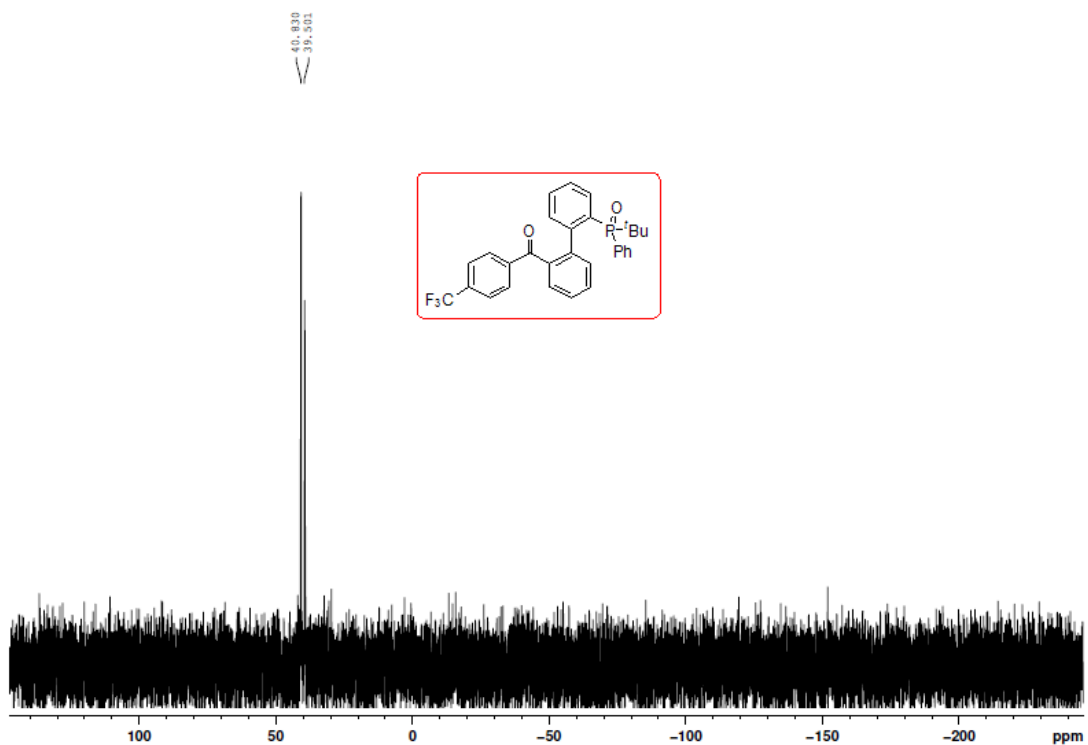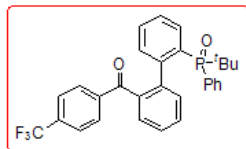

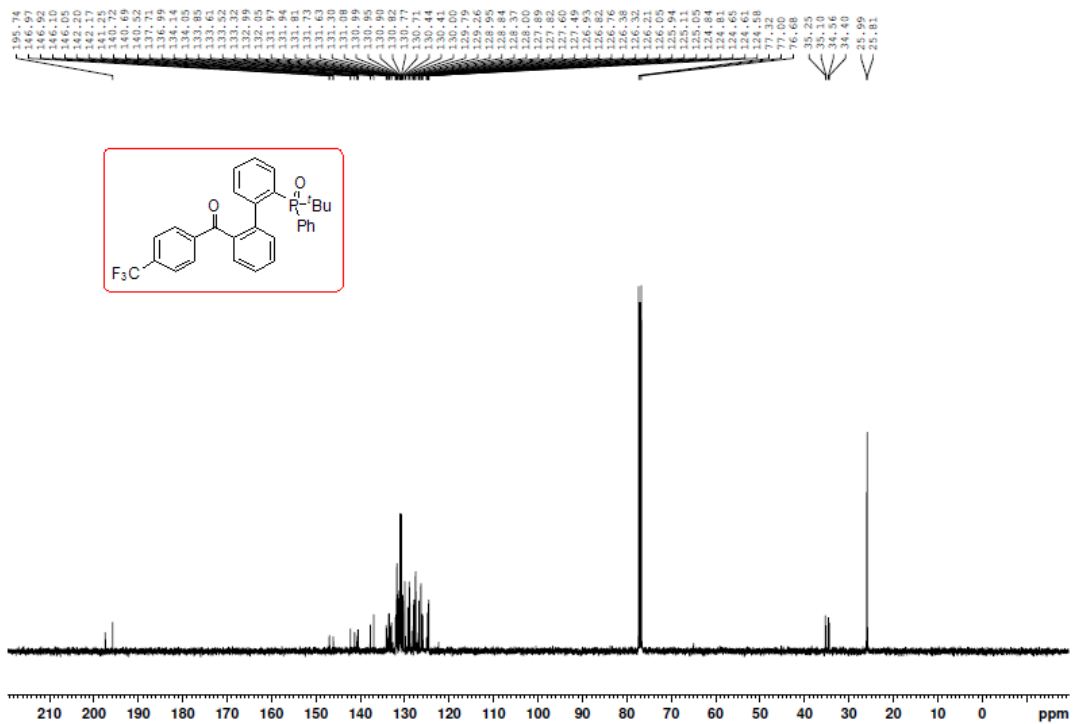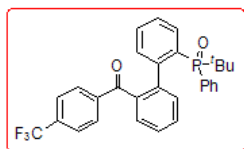

62.93  
62.98

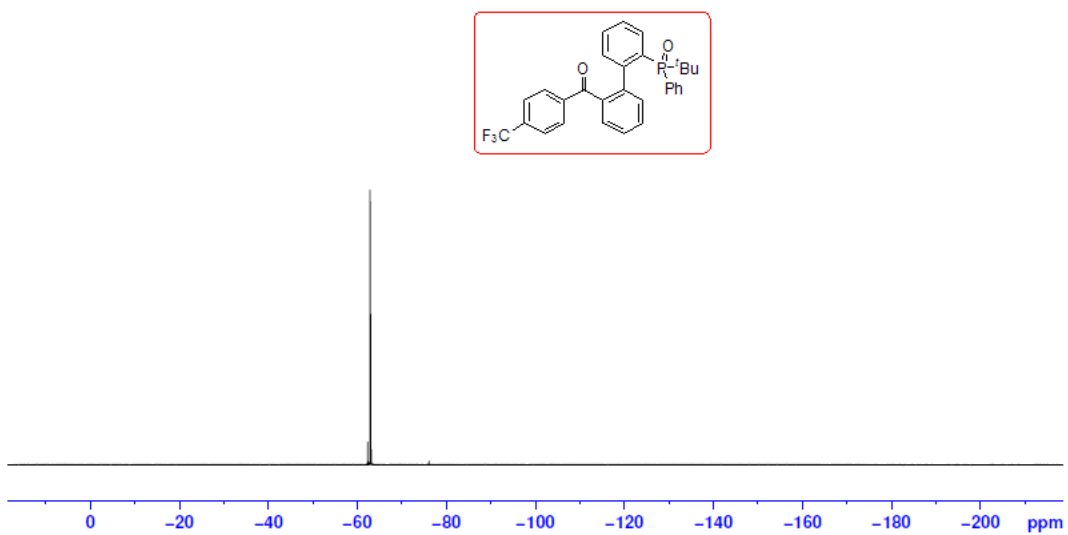

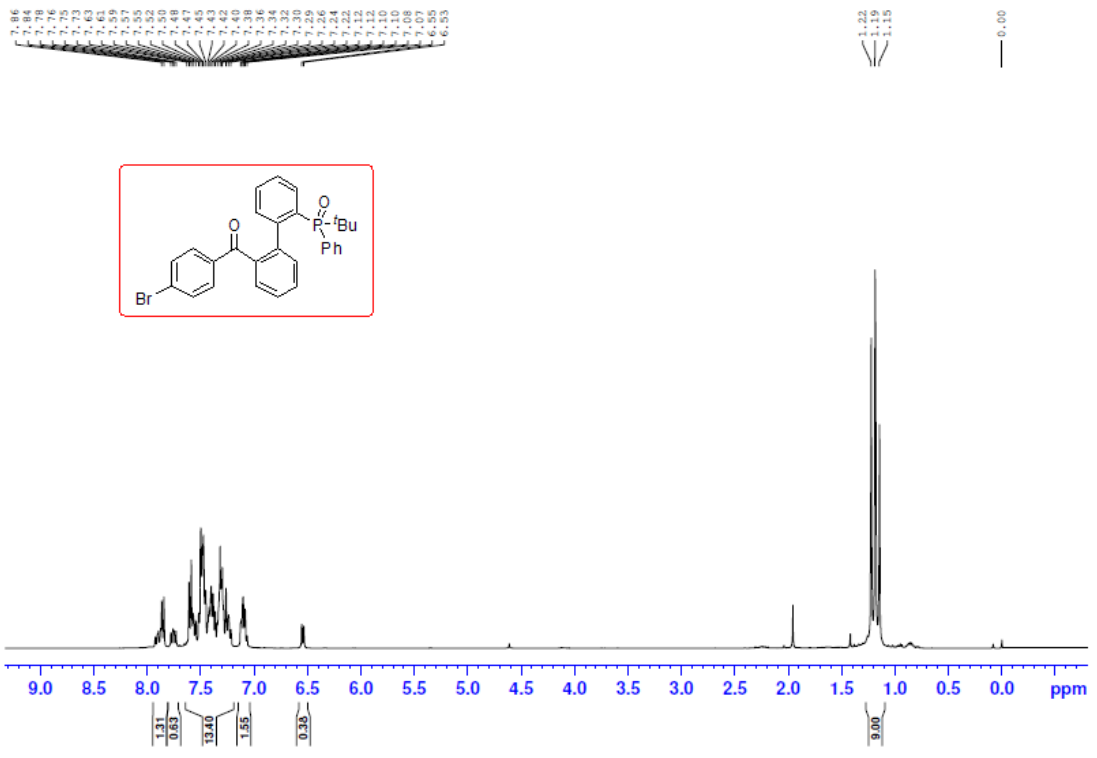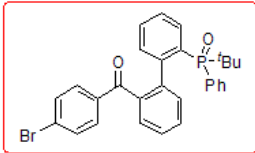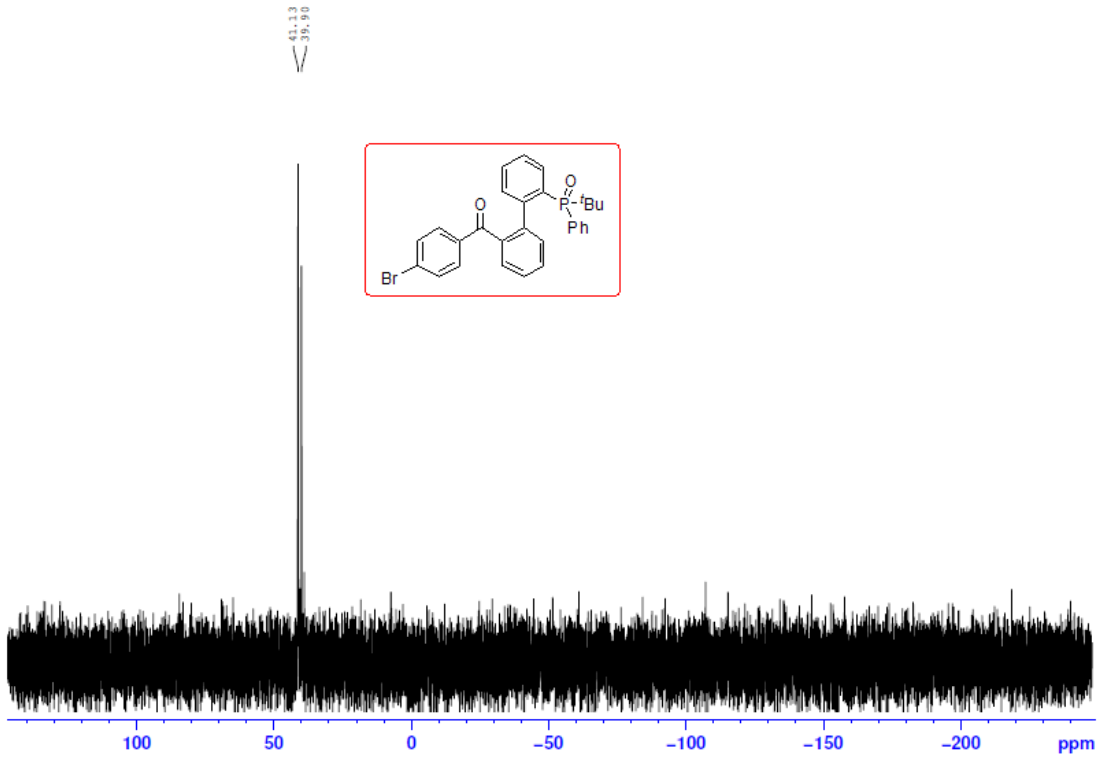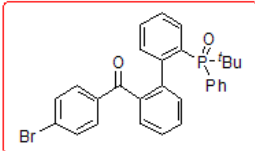

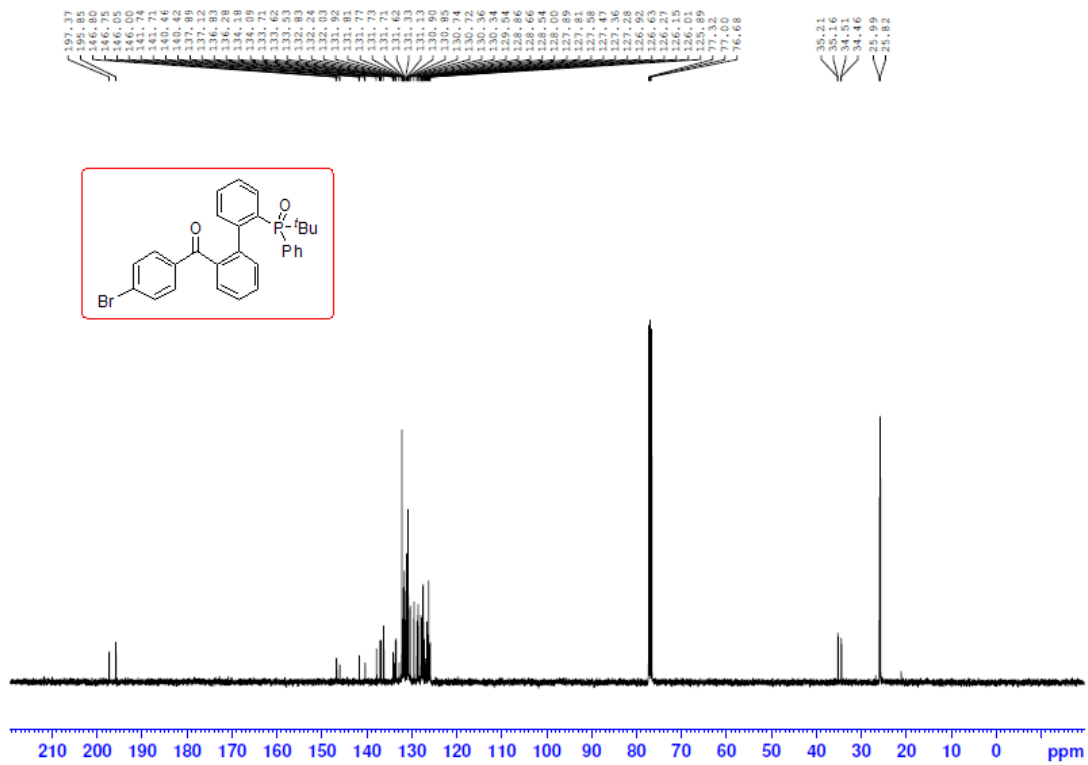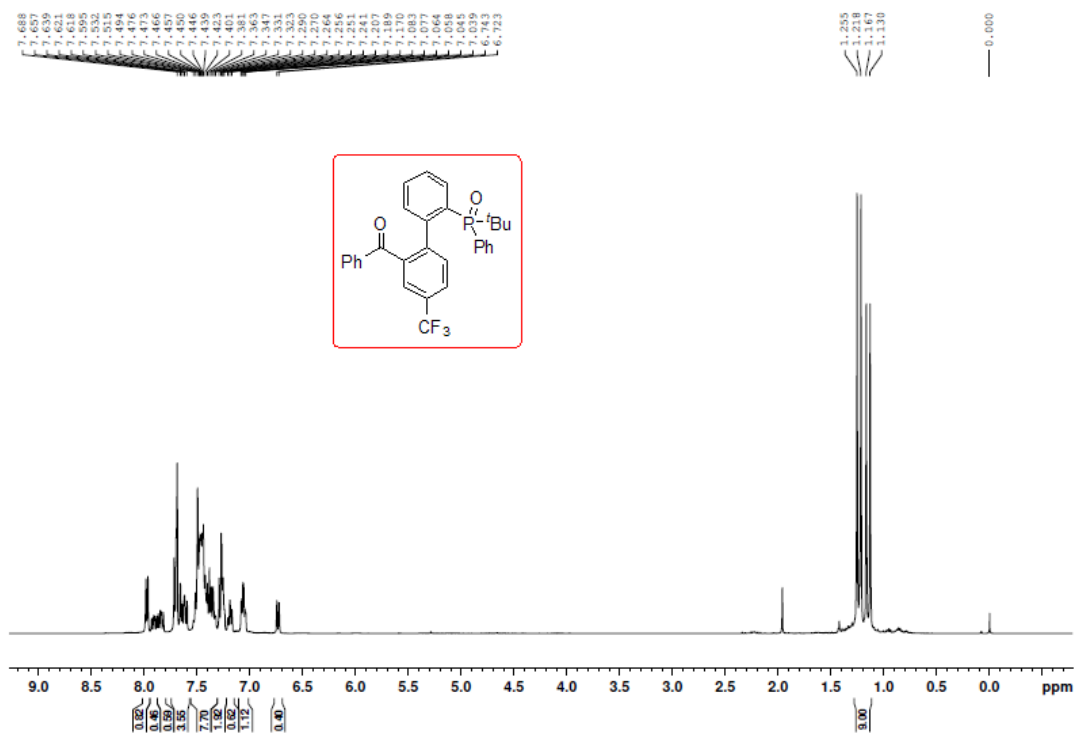

41.19  
39.74

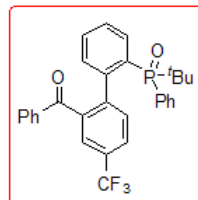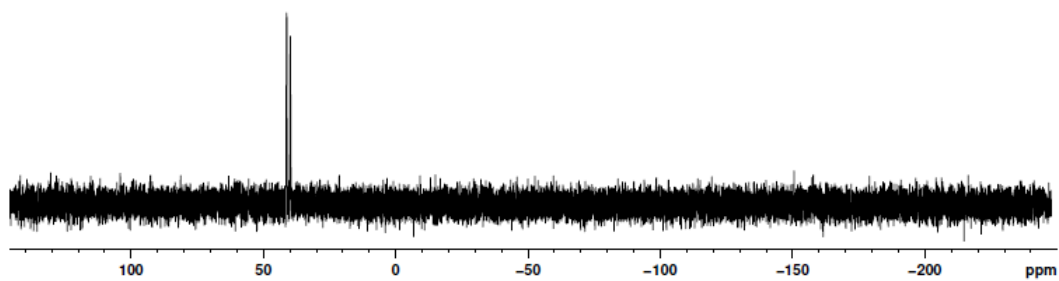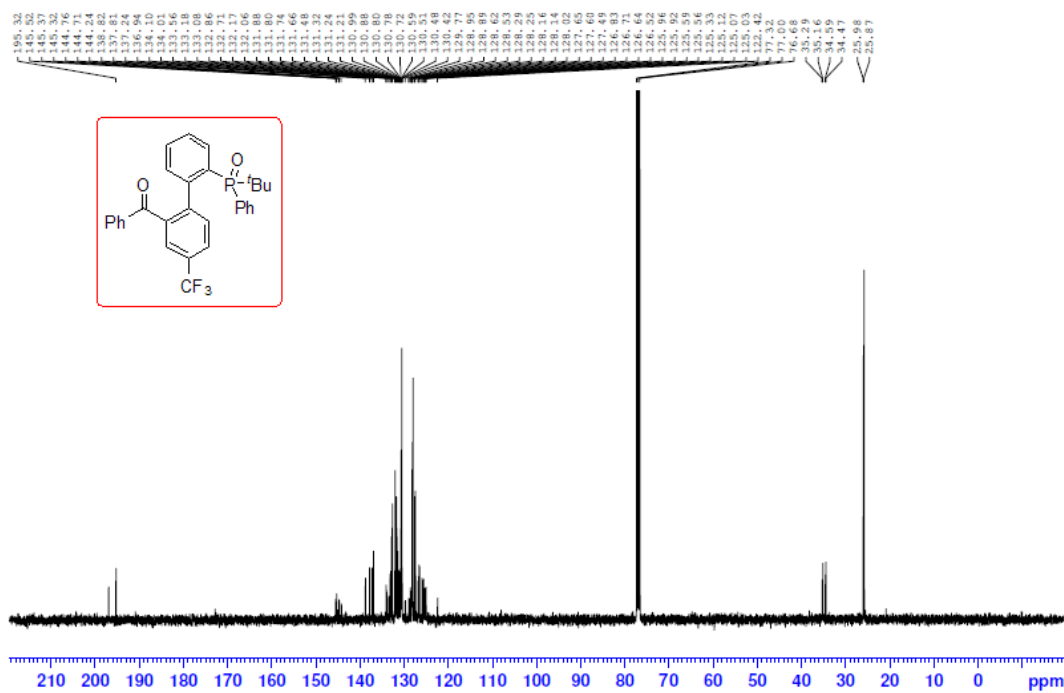

-62.39  
-62.50

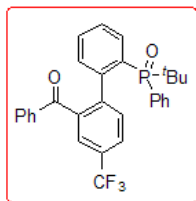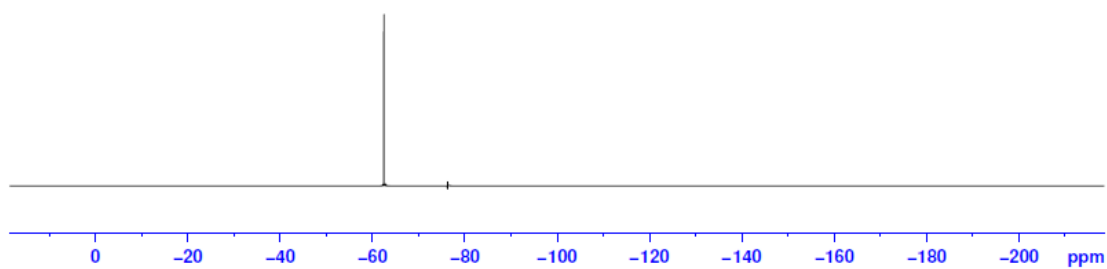

7.64  
7.64  
7.62  
7.62  
7.55  
7.55  
7.52  
7.52  
7.51  
7.51  
7.49  
7.49  
7.47  
7.47  
7.46  
7.46  
7.44  
7.44  
7.41  
7.41  
7.39  
7.39  
7.37  
7.37  
7.36  
7.36  
7.35  
7.35  
7.33  
7.33  
7.29  
7.29  
7.27  
7.27  
7.26  
7.26  
7.25  
7.25  
7.21  
7.21  
7.16  
7.16  
7.14  
7.14  
7.13  
7.13  
7.11  
7.11  
7.07  
7.07  
7.06  
7.06  
7.05  
7.05  
7.03  
7.03  
7.02  
7.02  
6.65  
6.65

2.40

1.26  
1.26  
1.16  
1.16  
1.13  
1.13

0.00

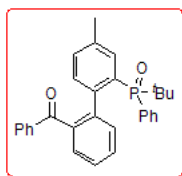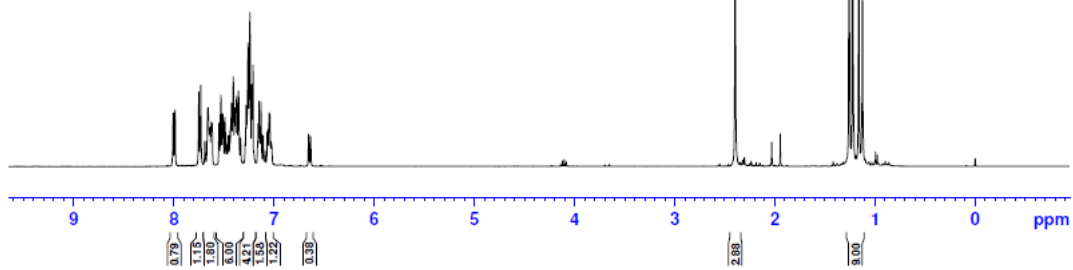

0.79  
1.15  
1.80  
0.00  
1.01  
1.55  
1.22  
0.38

2.88

9.00

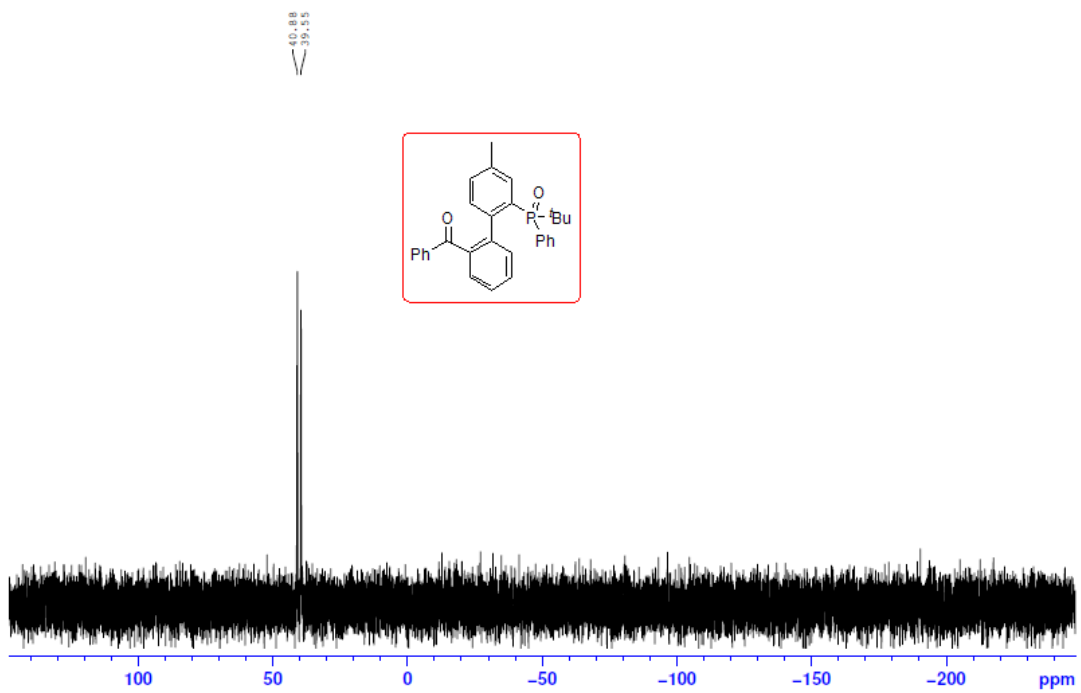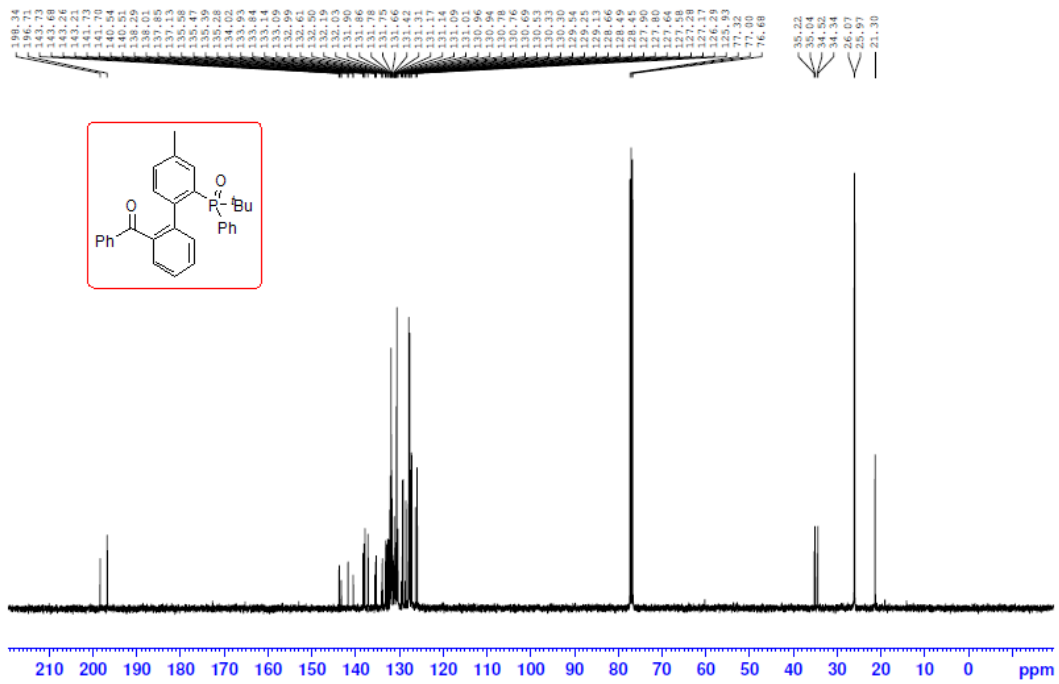

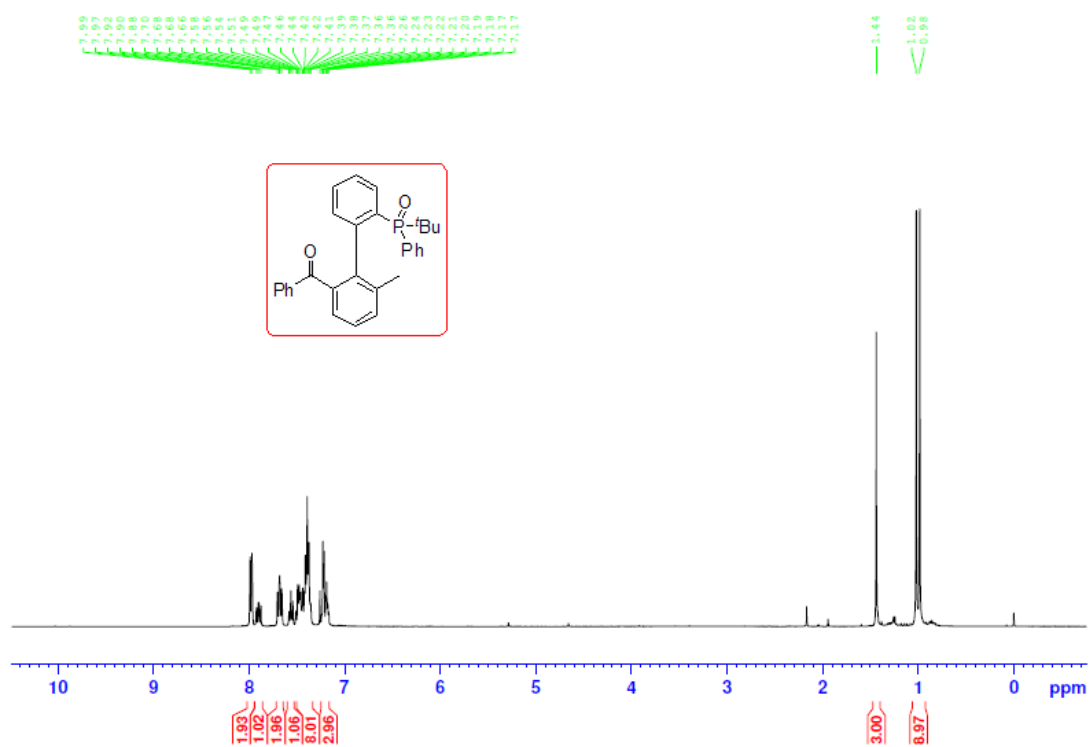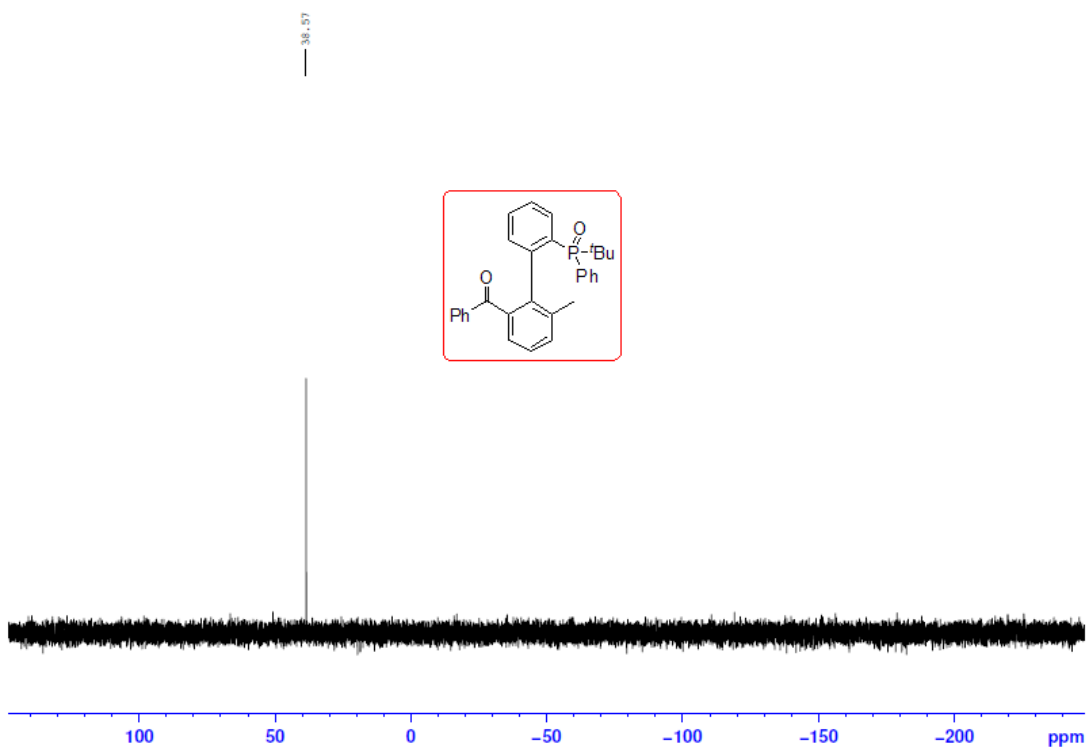



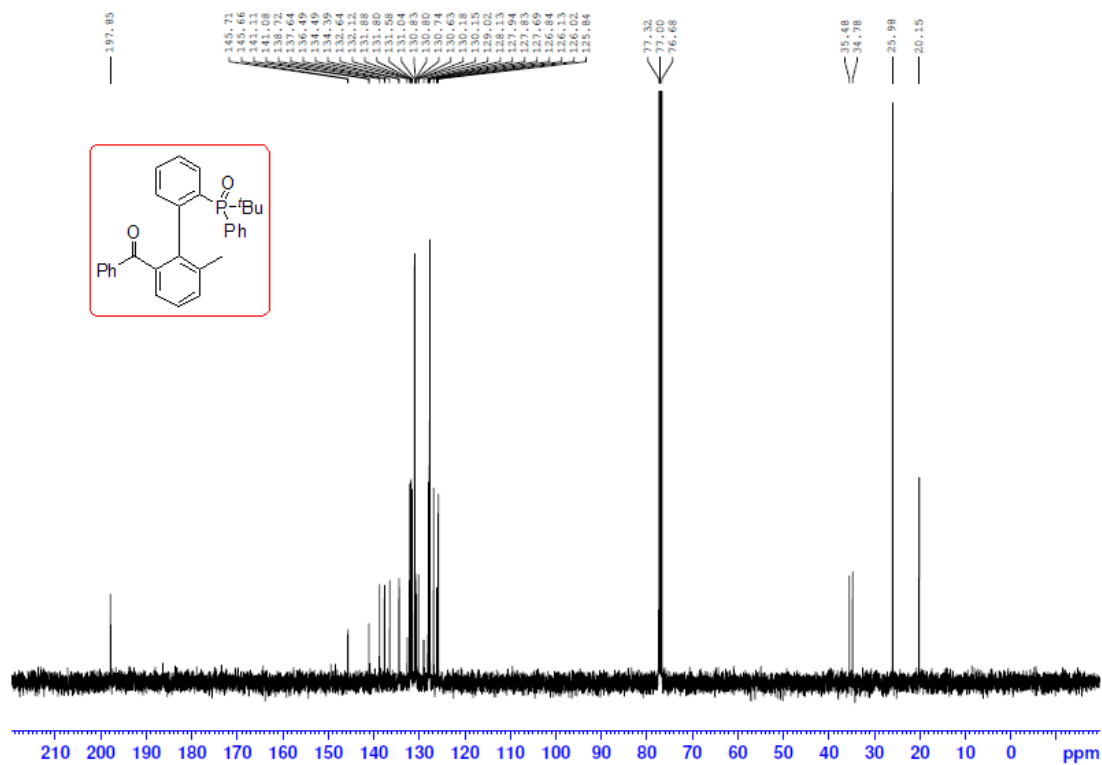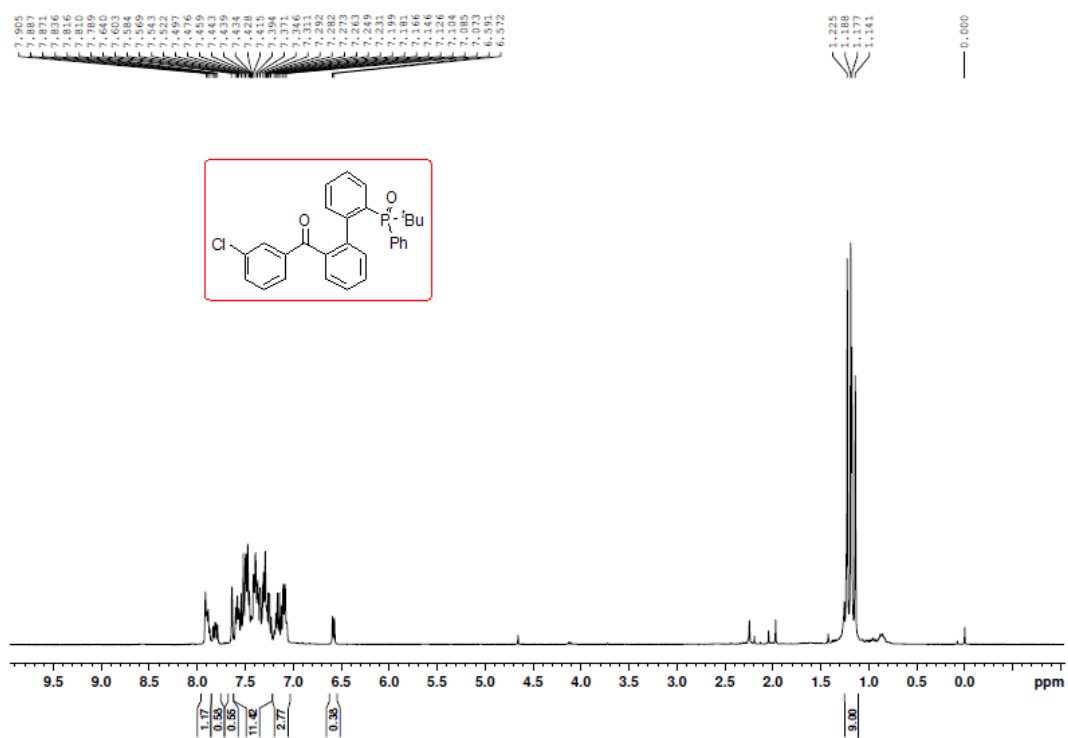



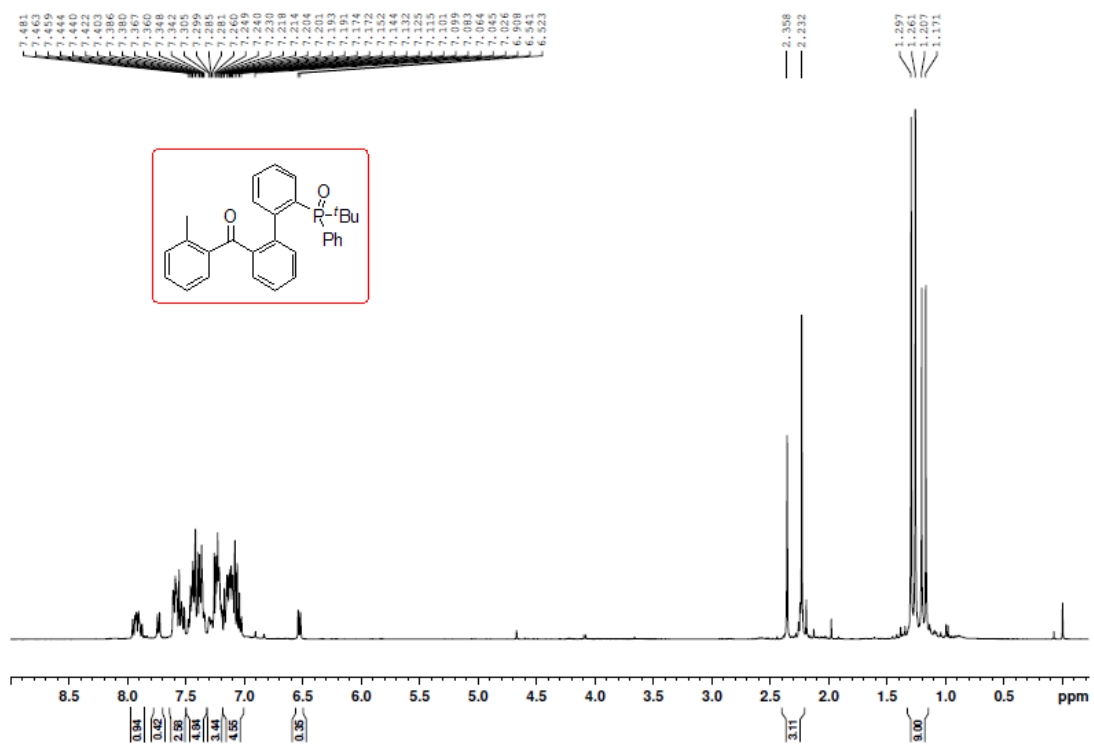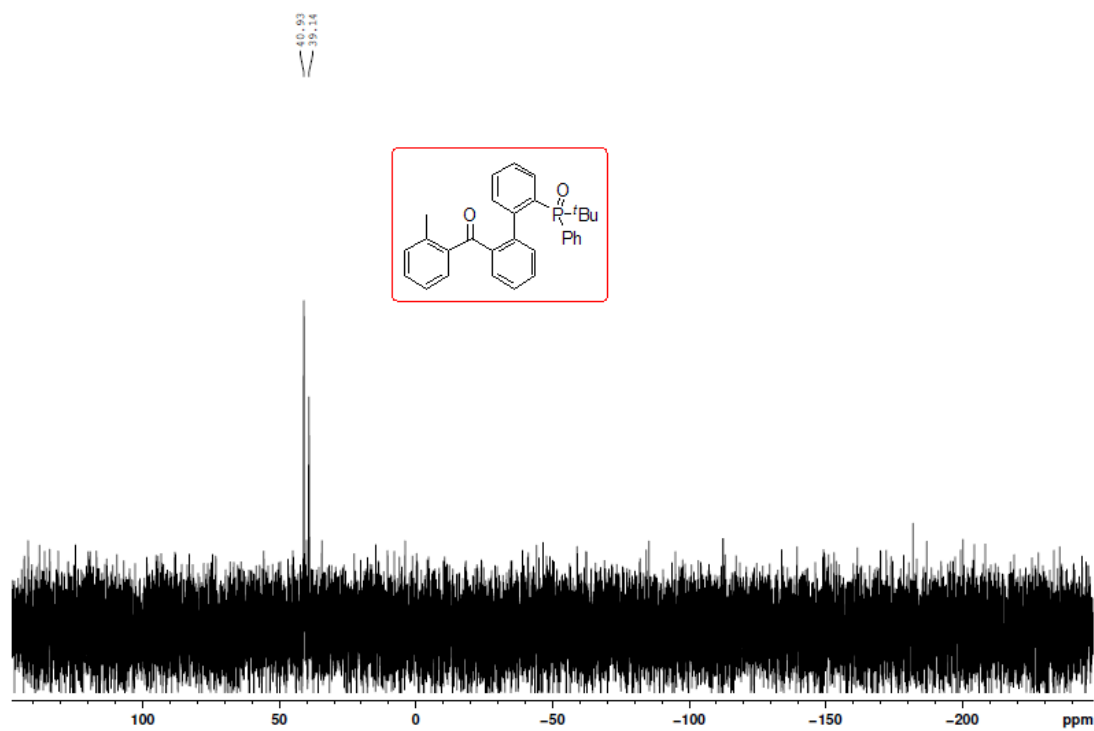

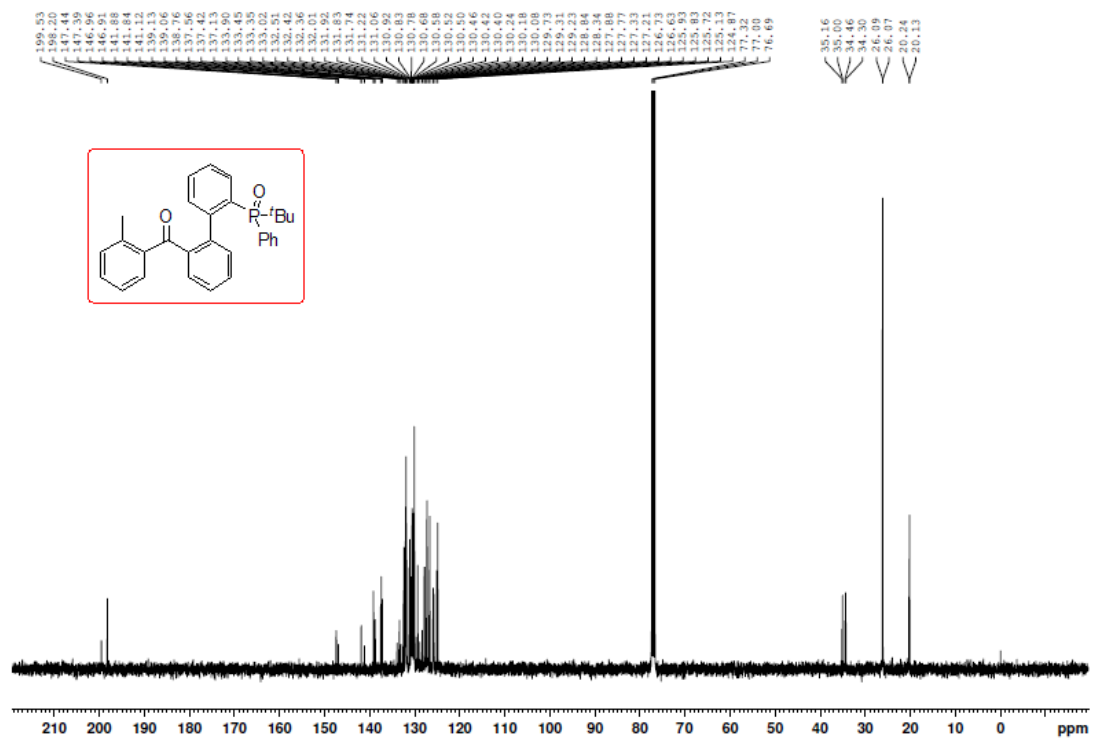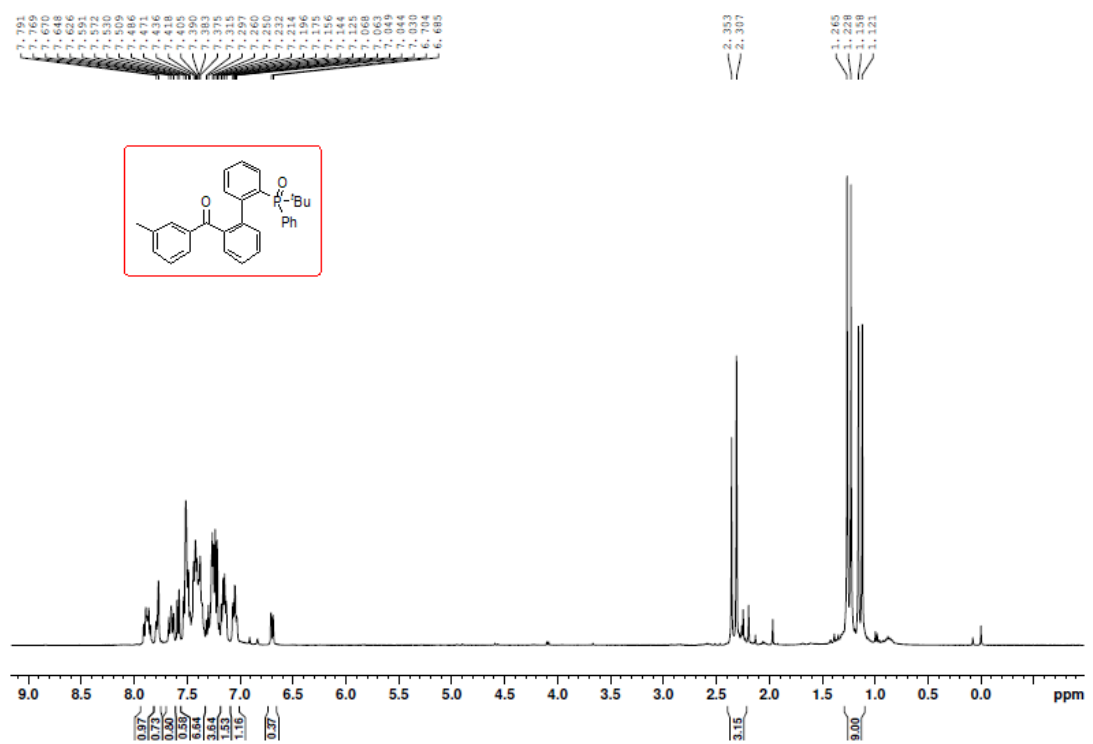

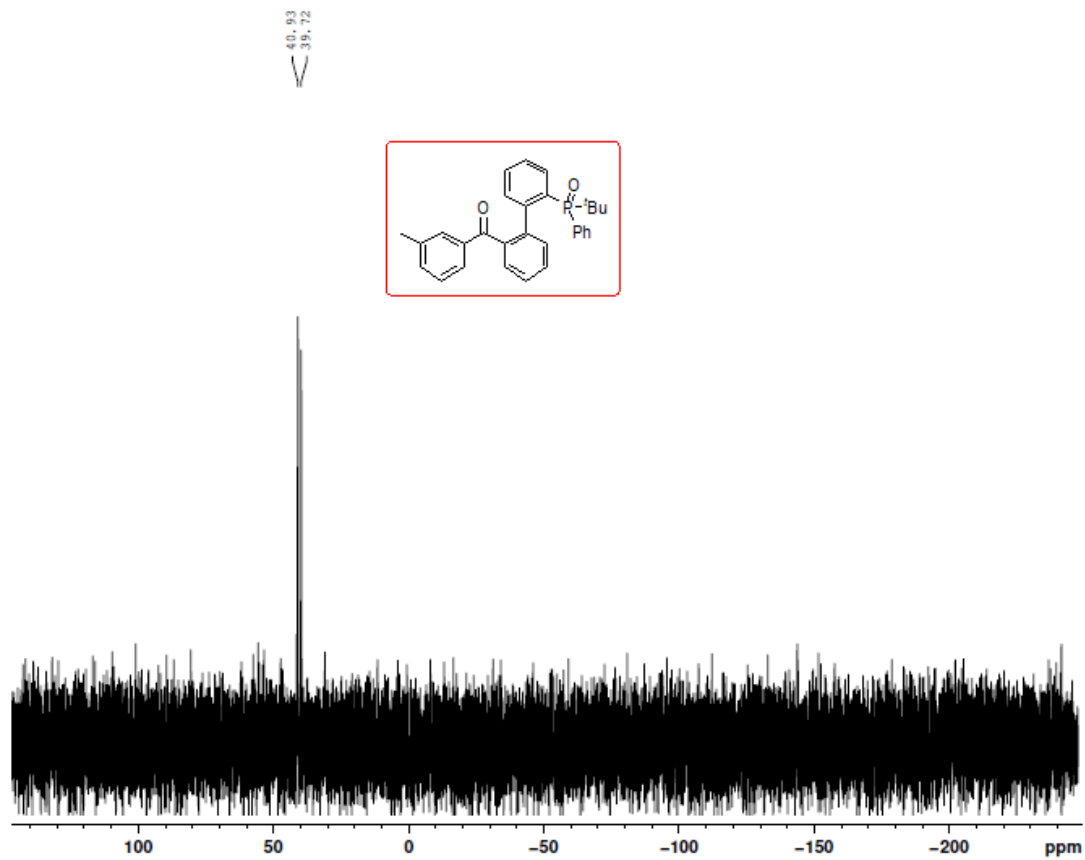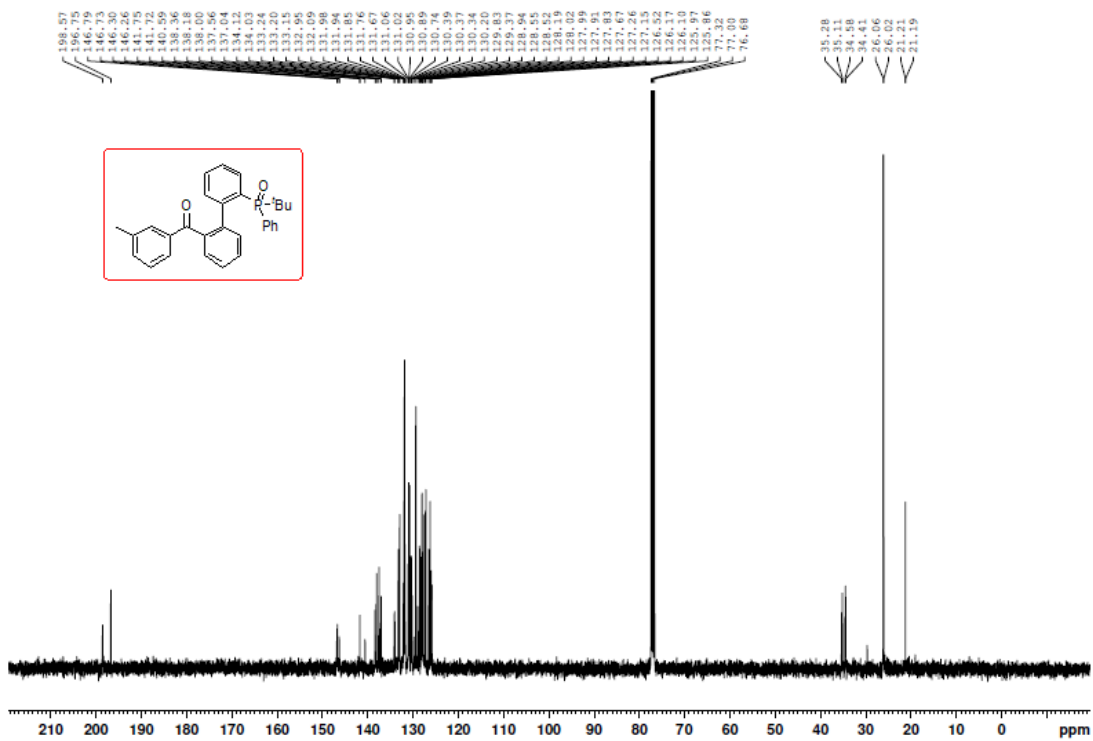

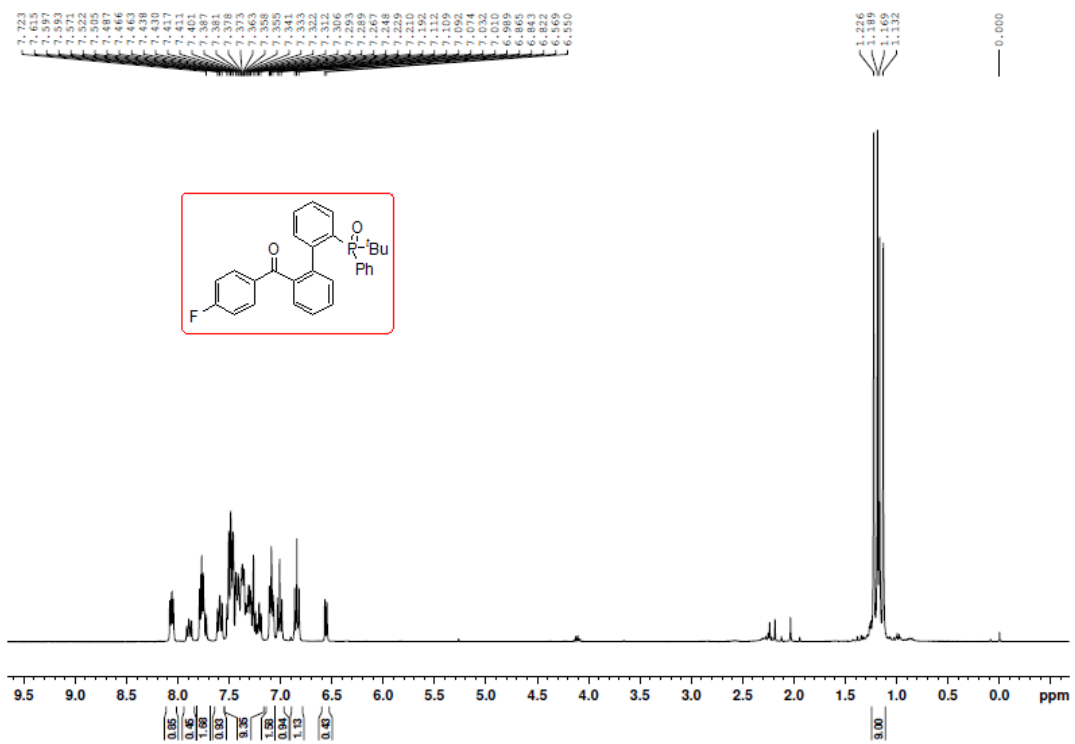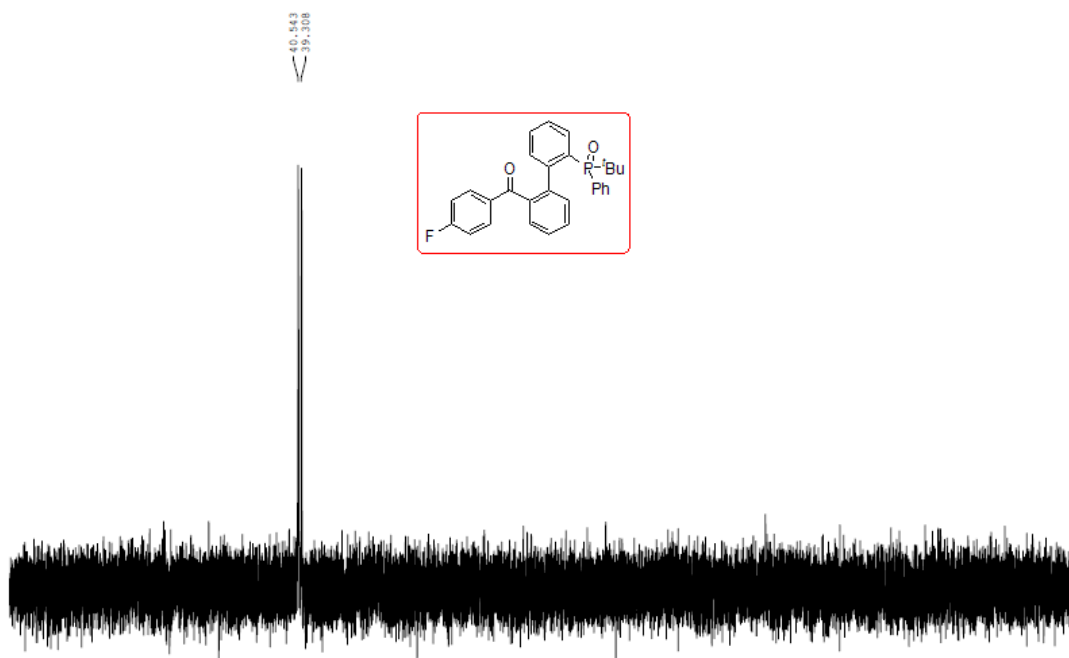

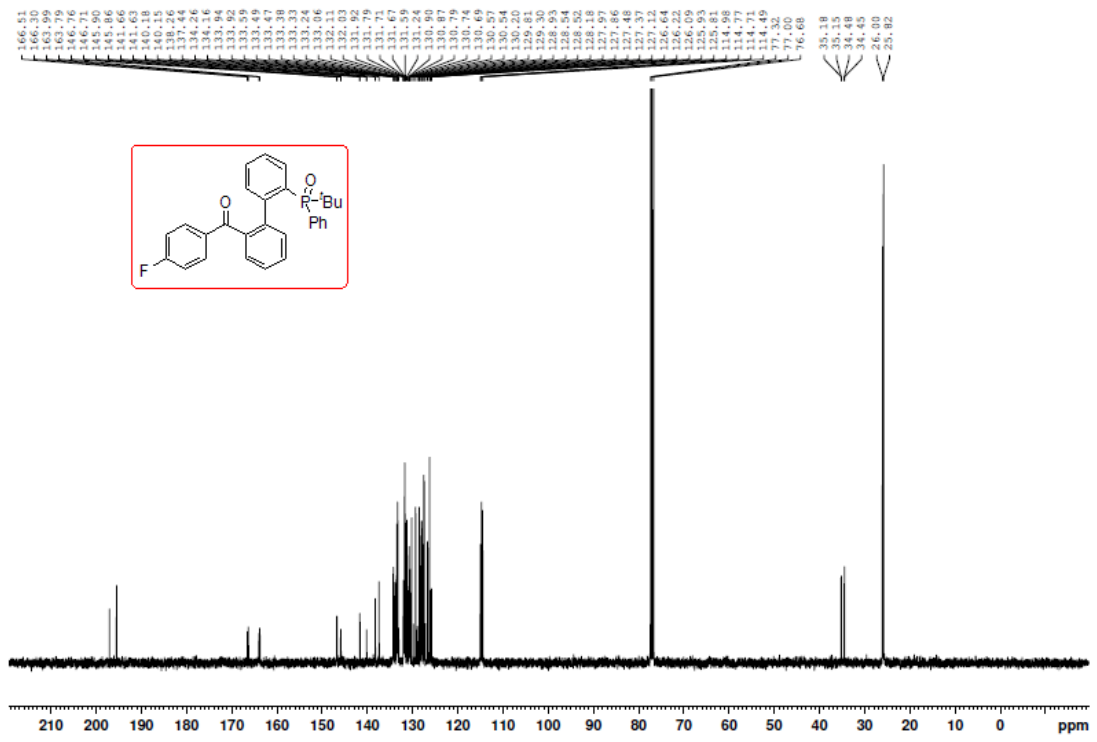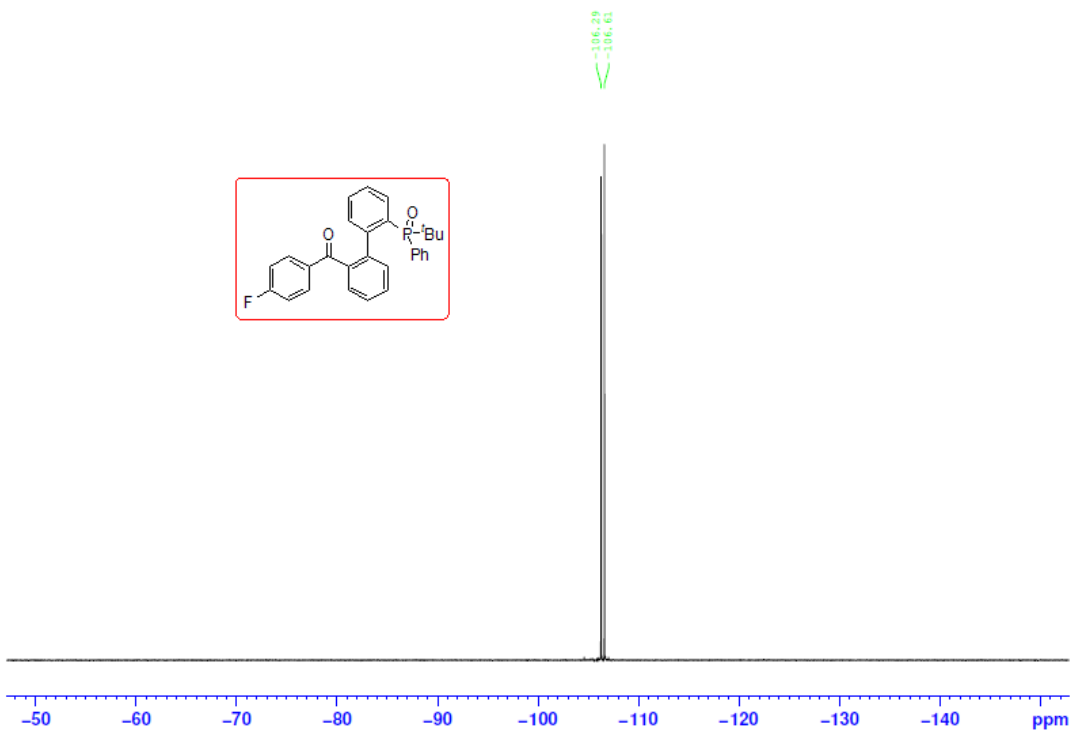









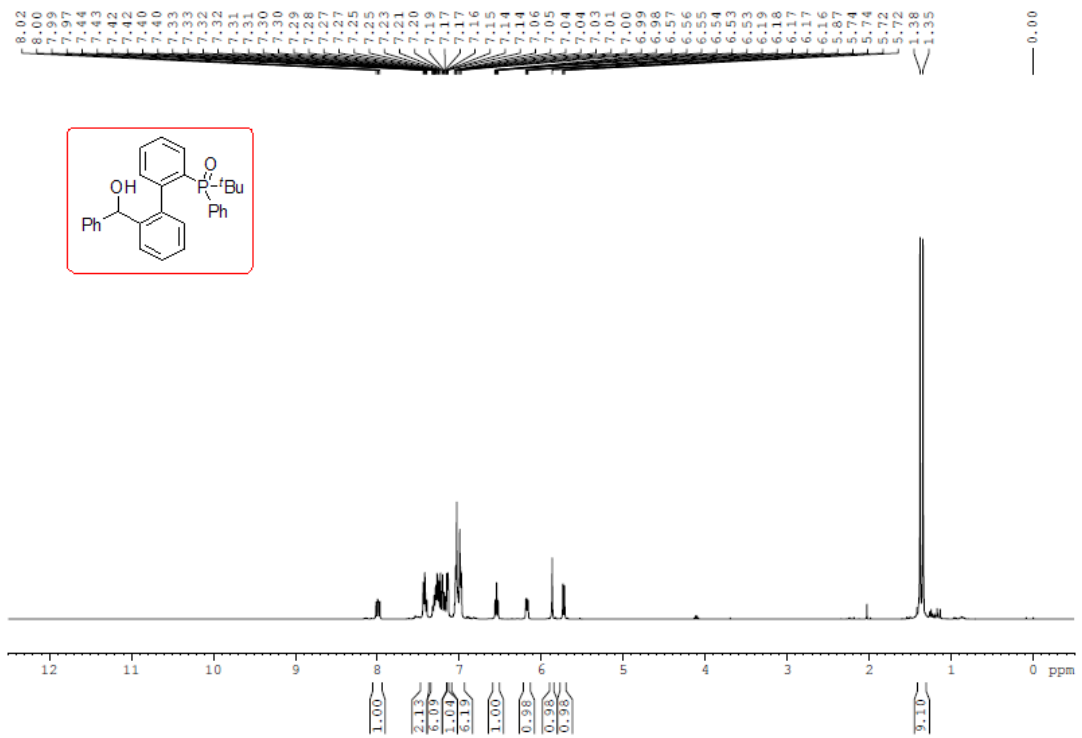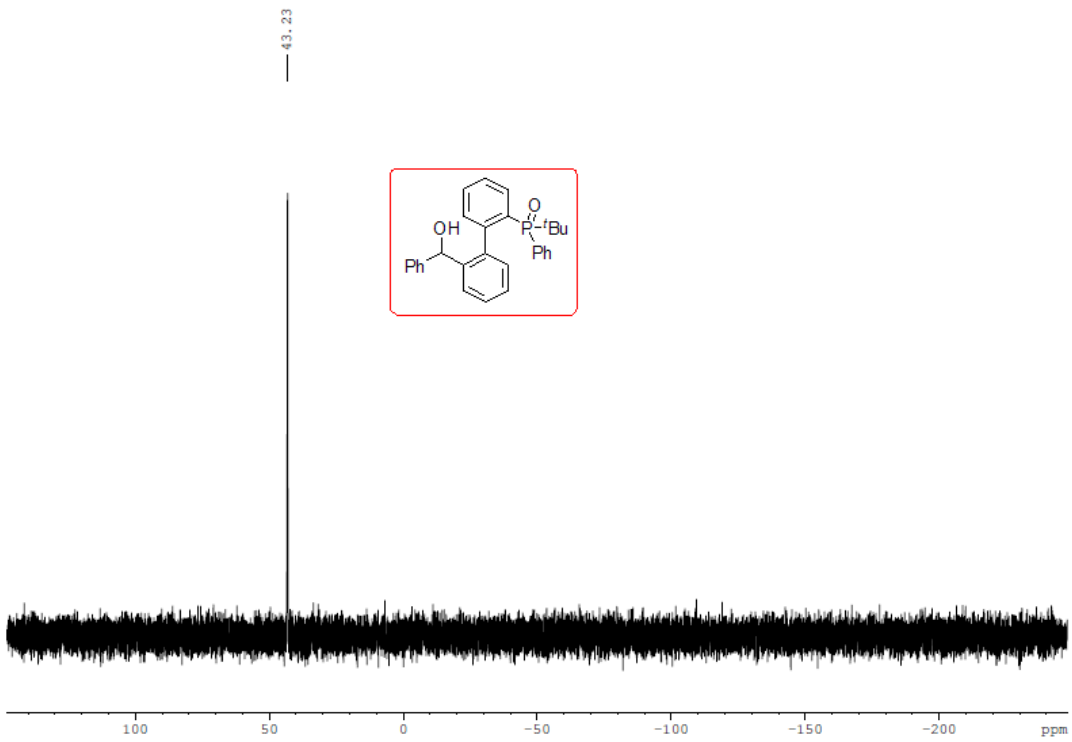

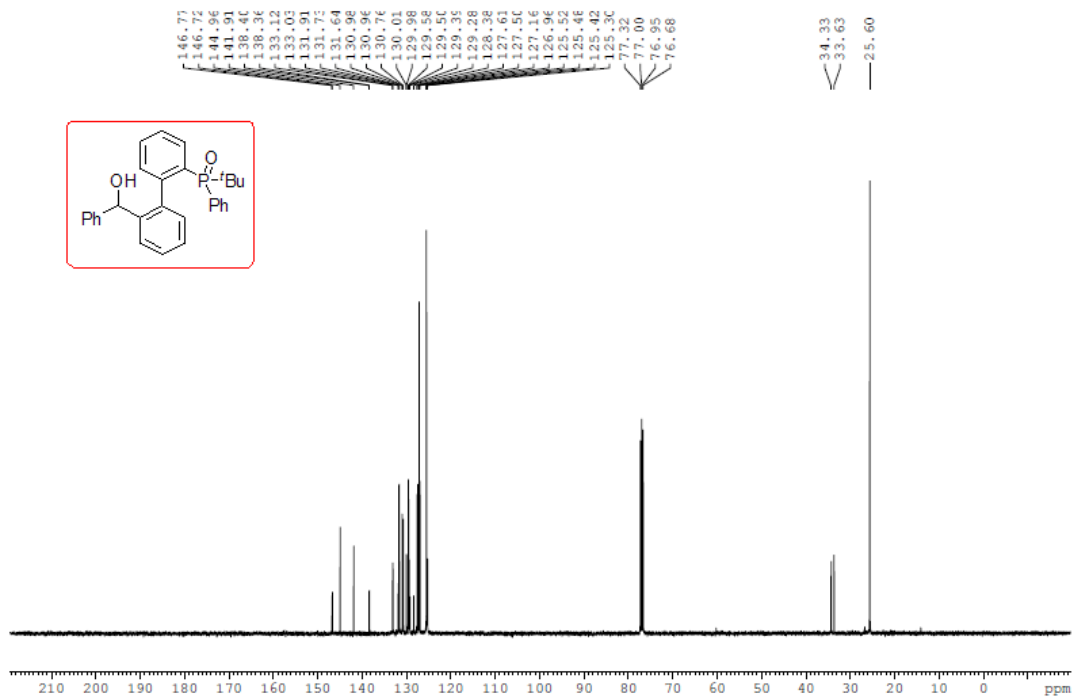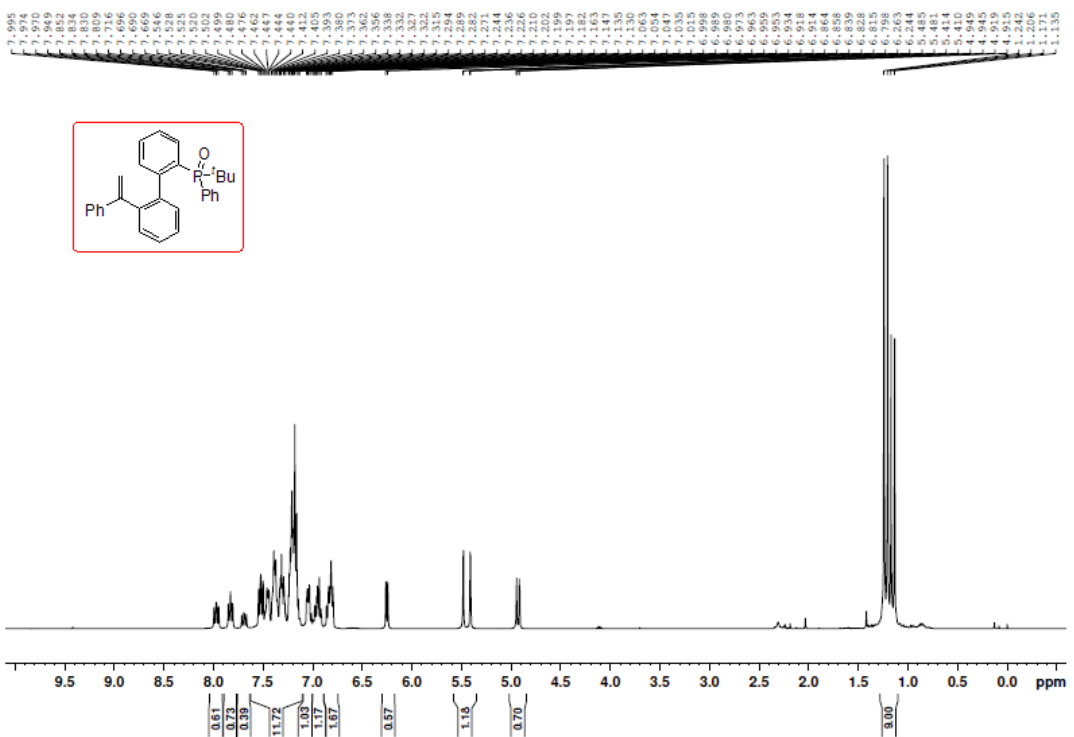

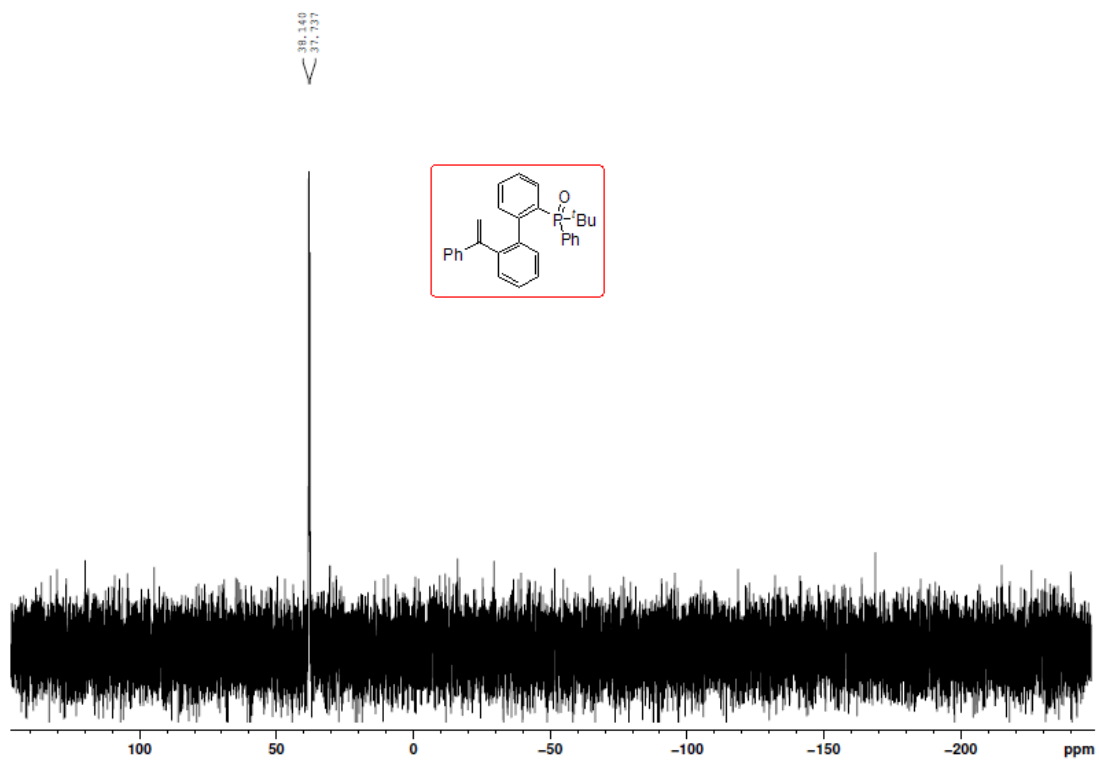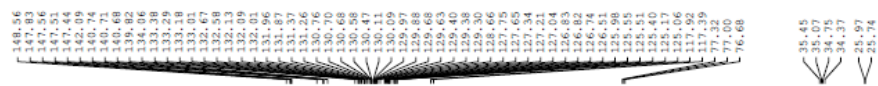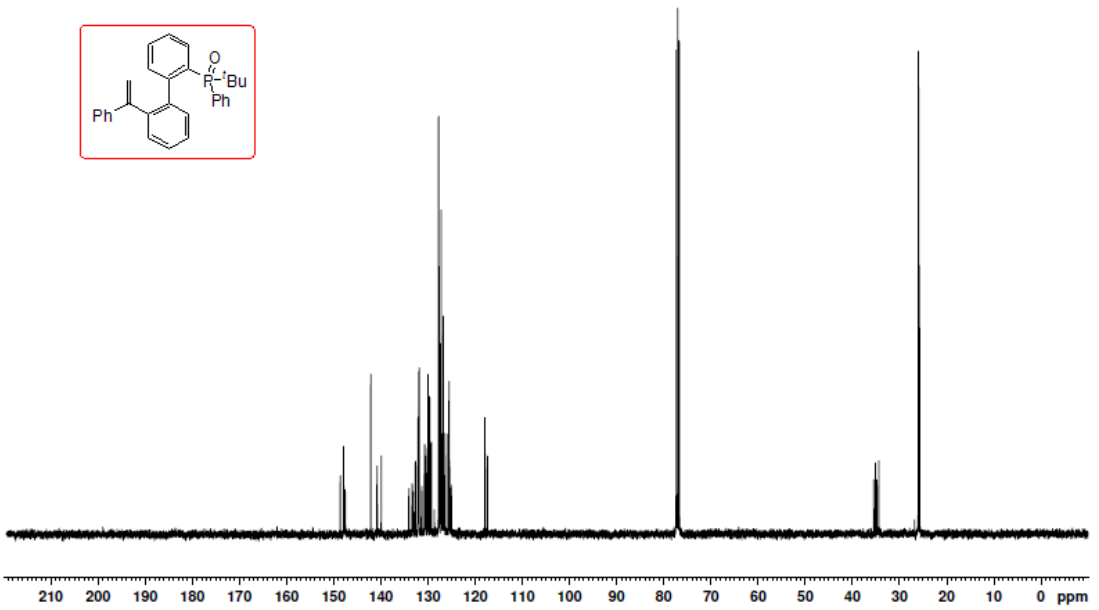

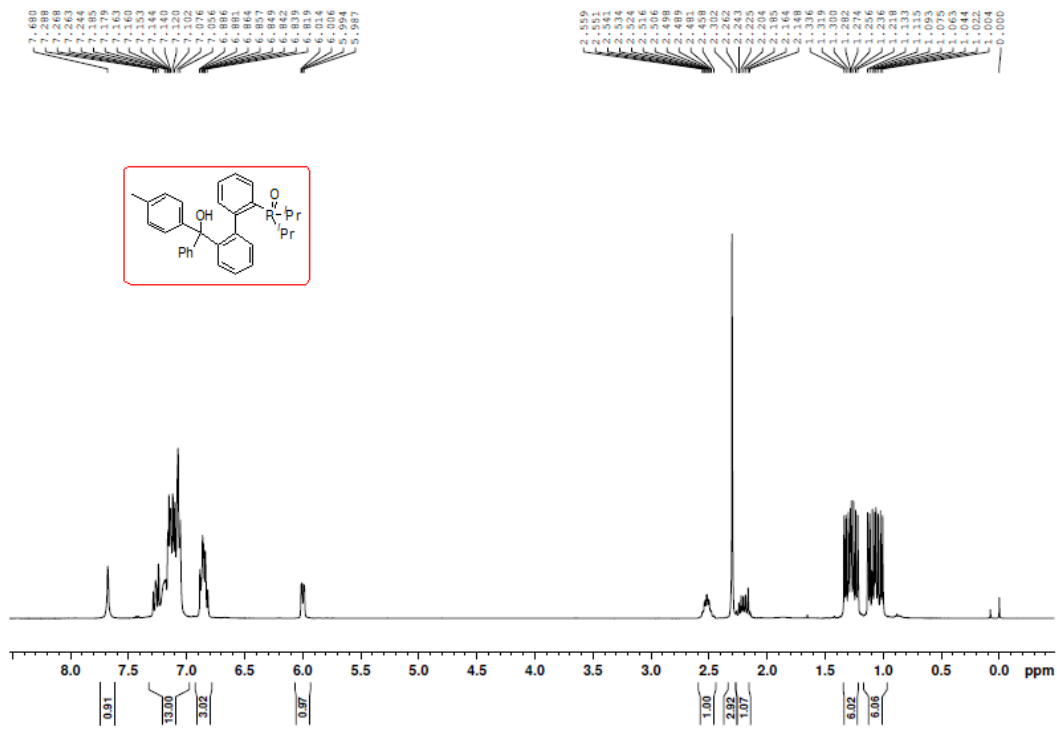

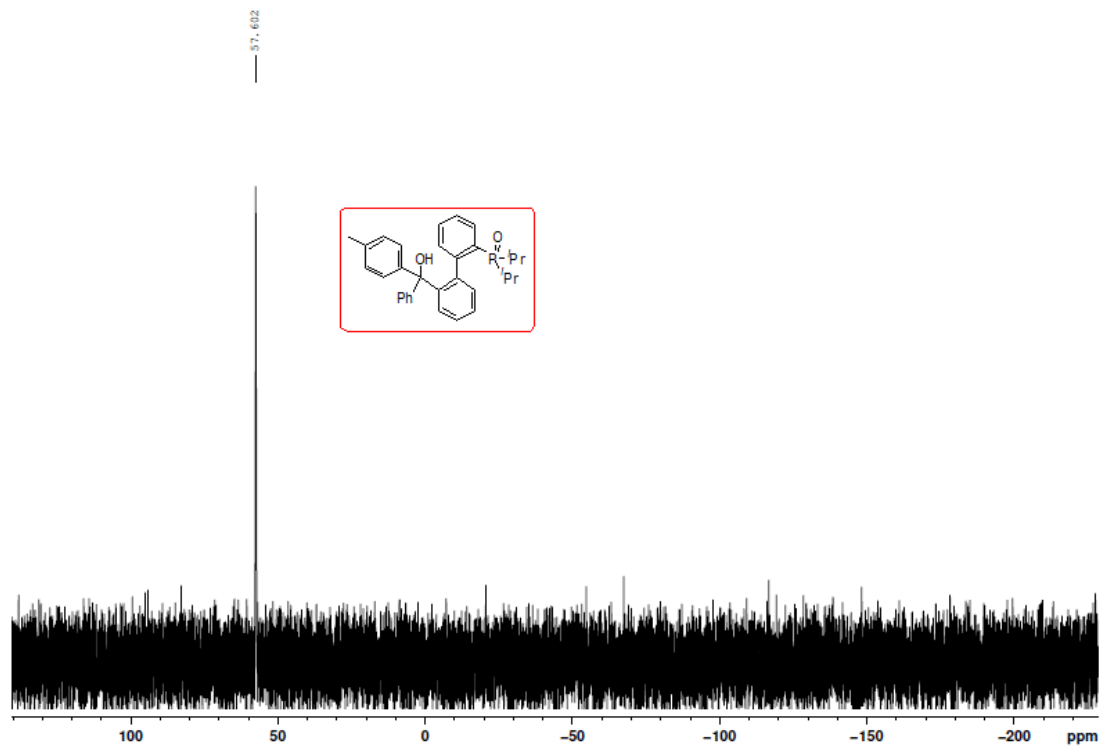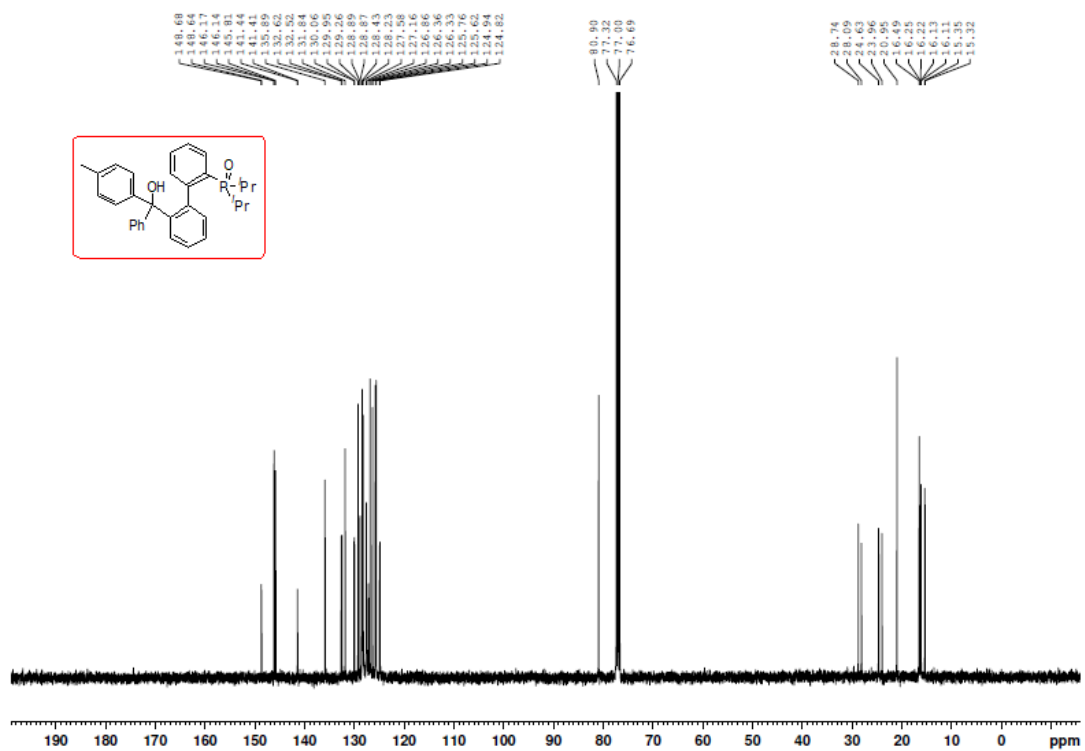

Supplement: c4qo00005f1.pdf [file c4qo00005f1.pdf]
